# Supplementary material
Source: PubMed Central journal article supplement (PMC6760471)

## Supporting Information

### Catalytic Asymmetric Synthesis of Diketopiperazines by Intramolecular Tsuji-Trost Allylation

Matteo Faltracco<sup>†</sup>, Silvia Cotogno<sup>†</sup>, Christophe M. L. Vande Velde<sup>‡</sup> and Eelco Ruijter<sup>\*†</sup>

<sup>†</sup> Department of Chemistry & Pharmaceutical Sciences, Amsterdam Institute for Molecules, Medicines & Systems (AIMMS) Vrije Universiteit Amsterdam, De Boelelaan 1108, 1081 HZ Amsterdam, The Netherlands

<sup>‡</sup> Advanced Reactor Technology, Faculty of Applied Engineering, University of Antwerp, Groenenborgerlaan 171, 2020 Antwerpen, Belgium

Email: [e.ruijter@vu.nl](mailto:e.ruijter@vu.nl)

## Contents

|                                                 |    |
|-------------------------------------------------|----|
| Optimization of reaction conditions .....       | S3 |
| X-Ray crystallography.....                      | S6 |
| Determination of enantiomeric ratio by SFC..... | S7 |
| NMR Spectra .....                               | S8 |



|                 |             |                                  |            |       |                   |      |        |      |
|-----------------|-------------|----------------------------------|------------|-------|-------------------|------|--------|------|
| 42              | Et          | Pd <sub>2</sub> dba <sub>3</sub> | <b>L4</b>  | 0.2   | DMF               | r.t. | -      | -    |
| 43              | Et          | Pd <sub>2</sub> dba <sub>3</sub> | <b>L4</b>  | 0.2   | Diox              | r.t. | 41%    | 88%  |
| 44              | Et          | Pd <sub>2</sub> dba <sub>3</sub> | <b>L4</b>  | 0.2   | MeCN              | r.t. | traces | n.d. |
| 45              | Et          | Pd <sub>2</sub> dba <sub>3</sub> | <b>L4</b>  | 0.2   | Et <sub>2</sub> O | r.t. | 17%    | 84%  |
| 46              | Et          | Pd <sub>2</sub> dba <sub>3</sub> | <b>L4</b>  | 0.2   | MeOtBu            | r.t. | 13%    | 81%  |
| 47              | Et          | Pd <sub>2</sub> dba <sub>3</sub> | <b>L4</b>  | 0.2   | 2-MeTHF           | r.t. | 40%    | 86%  |
| 48              | Et          | Pd <sub>2</sub> dba <sub>3</sub> | <b>L4</b>  | 0.2   | Anisole           | r.t. | 36%    | 84%  |
| 49              | Et          | Pd <sub>2</sub> dba <sub>3</sub> | <b>L4</b>  | 0.2   | DCM/Diox 1:1      | r.t. | 41%    | 87%  |
| 50              | Et          | Pd <sub>2</sub> dba <sub>3</sub> | <b>L4</b>  | 0.2   | DCM/Diox 2:1      | r.t. | 48%    | 86%  |
| 51              | Et          | Pd <sub>2</sub> dba <sub>3</sub> | <b>L4</b>  | 0.2   | DCM/Diox 4:1      | r.t. | 55%    | 86%  |
| 52              | Et          | Pd <sub>2</sub> dba <sub>3</sub> | <b>L4</b>  | 0.2   | DCM/Diox 8:1      | r.t. | 40%    | 85%  |
| 53 <sup>k</sup> | Et          | Pd <sub>2</sub> dba <sub>3</sub> | <b>L4</b>  | 0.2   | Diox              | r.t. | 31%    | 92%  |
| 54 <sup>l</sup> | Et          | Pd <sub>2</sub> dba <sub>3</sub> | <b>L4</b>  | 0.2   | Diox              | r.t. | 11%    | n.d. |
| 55              | Et          | Pd <sub>2</sub> dba <sub>3</sub> | <b>L4</b>  | 0.2   | DCM               | 0°C  | 22%    | 60%  |
| 56              | Et          | Pd <sub>2</sub> dba <sub>3</sub> | <b>L4</b>  | 0.5   | Diox              | r.t. | 21%    | 86%  |
| 57              | Et          | Pd <sub>2</sub> dba <sub>3</sub> | <b>L4</b>  | 0.1   | Diox              | r.t. | 54%    | 89%  |
| 58              | Et          | Pd <sub>2</sub> dba <sub>3</sub> | <b>L4</b>  | 0.05  | Diox              | r.t. | 53%    | 90%  |
| 59              | Et          | Pd <sub>2</sub> dba <sub>3</sub> | <b>L4</b>  | 0.025 | Diox              | r.t. | 86%    | 94%  |
| 60              | Et          | Pd <sub>2</sub> dba <sub>3</sub> | <b>L4</b>  | 0.01  | Diox              | r.t. | 56%    | 94%  |
| 61              | Et          | Pd <sub>2</sub> dba <sub>3</sub> | <b>L10</b> | 0.025 | Diox              | r.t. | -      | -    |
| 62              | Et          | Pd <sub>2</sub> dba <sub>3</sub> | <b>L11</b> | 0.025 | Diox              | r.t. | -      | -    |
| 63              | Et          | Pd <sub>2</sub> dba <sub>3</sub> | <b>L12</b> | 0.025 | Diox              | r.t. | 46%    | 91%  |
| 64              | Et          | Pd <sub>2</sub> dba <sub>3</sub> | <b>L13</b> | 0.025 | Diox              | r.t. | 49%    | 42%  |
| 65              | Et          | Pd <sub>2</sub> dba <sub>3</sub> | <b>L14</b> | 0.025 | Diox              | r.t. | 81%    | 41%  |
| 66              | Et          | Pd <sub>2</sub> dba <sub>3</sub> | <b>L15</b> | 0.025 | Diox              | r.t. | 88%    | 90%  |
| 67              | Me          | Pd <sub>2</sub> dba <sub>3</sub> | <b>L4</b>  | 0.025 | Diox              | r.t. | 80%    | 88%  |
| 68              | <i>t</i> Bu | Pd <sub>2</sub> dba <sub>3</sub> | <b>L4</b>  | 0.025 | Diox              | r.t. | 38%    | 78%  |
| 69 <sup>m</sup> | Et          | Pd <sub>2</sub> dba <sub>3</sub> | <b>L4</b>  | 0.025 | Diox              | r.t. | -      | -    |
| 70 <sup>n</sup> | Et          | Pd <sub>2</sub> dba <sub>3</sub> | <b>L4</b>  | 0.025 | Diox              | r.t. | -      | -    |
| 71 <sup>o</sup> | Et          | Pd <sub>2</sub> dba <sub>3</sub> | <b>L4</b>  | 0.025 | Diox              | r.t. | -      | -    |

<sup>a</sup>Reactions were performed using **2a** (0.20 mmol), Pd source (10 mol%), ligand (20 mol% for monodentate ligands and 10% for bidentate ligands) for 24h, unless stated otherwise. <sup>b</sup> Isolated yield. <sup>c</sup> Determined by chiral SFC. <sup>d</sup> Reaction performed using 20 mol % of **L1**, **L2** and **L3**. <sup>e</sup> Reaction performed using 40 mol % of **L4**. <sup>f</sup> Reaction performed using 10 mol % of **L4**. <sup>g</sup> Reaction performed using 10 mol% of **L4**. <sup>h</sup> Reaction performed using 15 mol % of **L4**. <sup>i</sup> Reaction performed using 40 mol% of **L4**. <sup>j</sup> Reaction time 120 h. <sup>k</sup> Reaction performed using 20 mol % catalyst loading and 40 mol% of **L4**. <sup>l</sup> Addition of catalyst/ligand complex over 24h. <sup>m</sup> Reaction performed using 1 eq. of *n*Bu<sub>4</sub>NCl. <sup>n</sup> Reaction performed using 1 eq. of *n*Bu<sub>4</sub>NF. <sup>o</sup> Reaction performed using 1 eq. of LiCl.

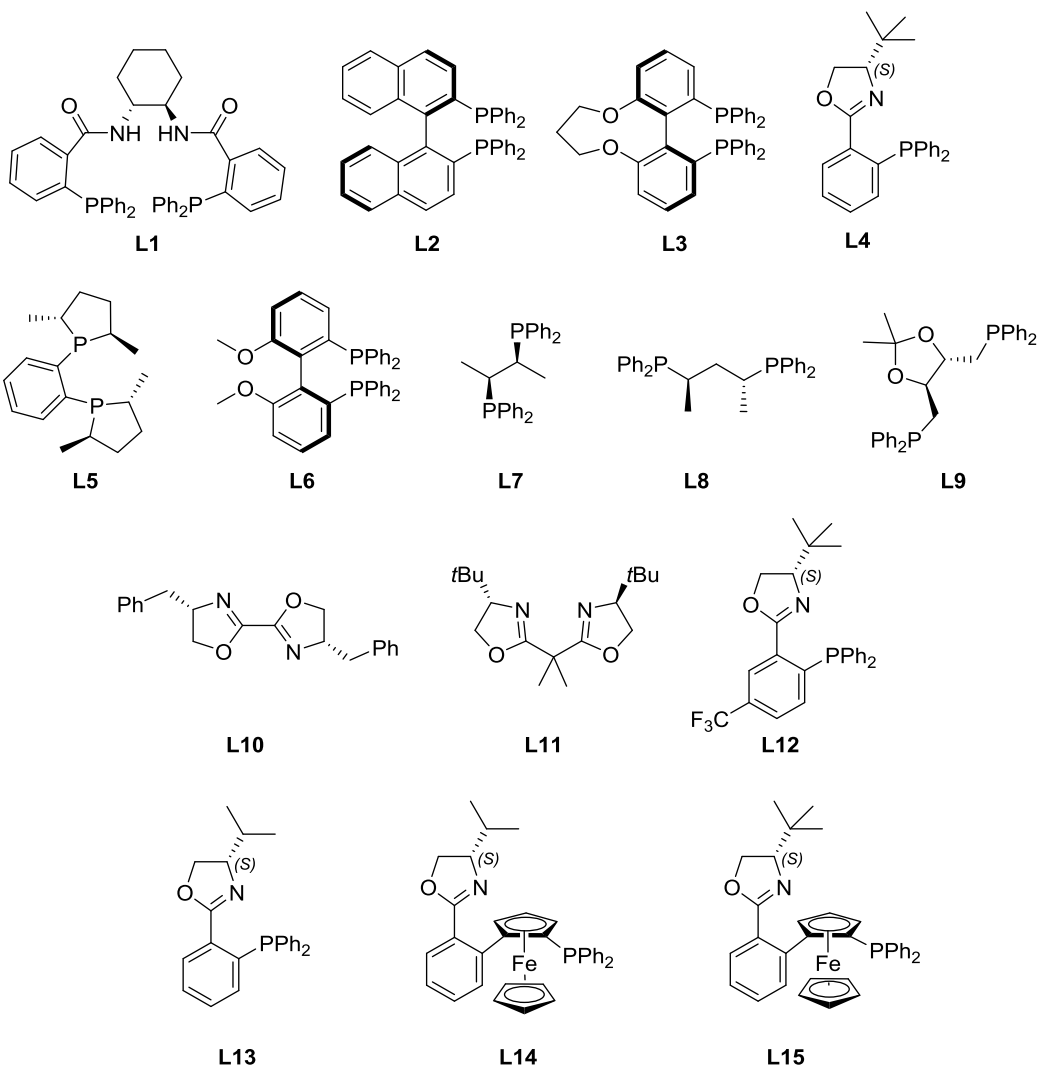

## X-Ray crystallography

Crystals of **7** suitable for single crystal X-ray diffraction were obtained from recrystallization by slow solvent evaporation from cyclohexane. Crystals were mounted on a borate glass capillary on an Agilent Supernova Kappa diffractometer with Cu microsource, and cooled to 100.0(1)K for intensity measurement by 0.5° omega scans. Intensity data were scaled and corrected for absorption by CrysAlisPro 1.171.39.45i.

The structure was solved with SHELXT (Sheldrick, 2015a) and refined with SHELXL 2016/4 (Sheldrick, 2015b). The space group was found to be  $P2_1$ , and the Flack parameter refined to -0.02(17) for absolute configuration *R*, with a Friedel pair coverage of 82%. (Figure 1)

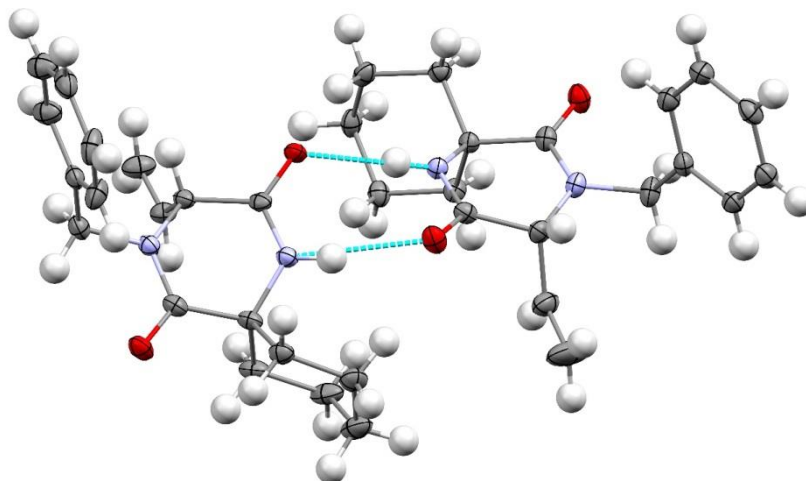

ORTEP plot of **7** with displacement ellipsoids at the 30% level and H atoms represented as spheres of arbitrary radius.

The structure forms N-H ...O hydrogen bonded pairs between the 2,5-pyrazinediones of the two non-symmetry equivalent molecules. The structure can thus be described as two sets of U-shaped channels consisting of dimers running along the *a* axis, in which both non-symmetry equivalent molecules have the *R*-configuration.

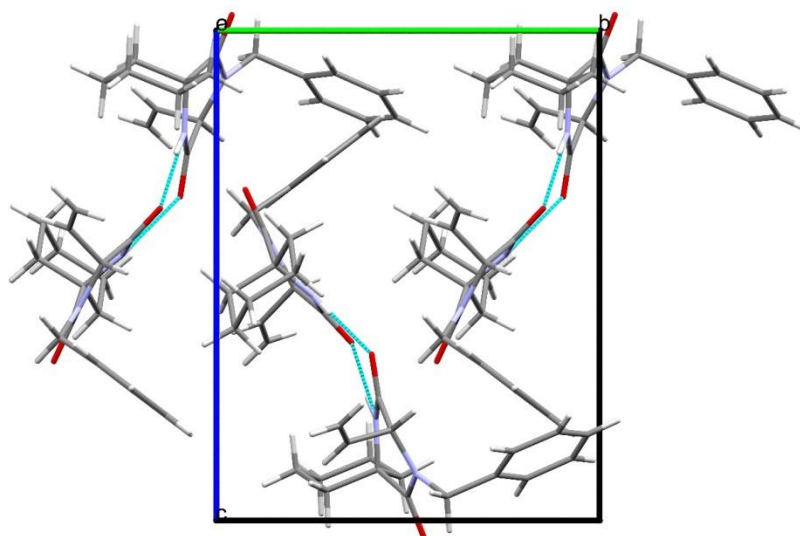

View of the structure along the *a* direction. Hydrogen bonds between the non-symmetry equivalent molecules are indicated by cyan dotted lines.

# Determination of enantiomeric ratio by SFC

==== Shimadzu LabSolutions Browser Report ====

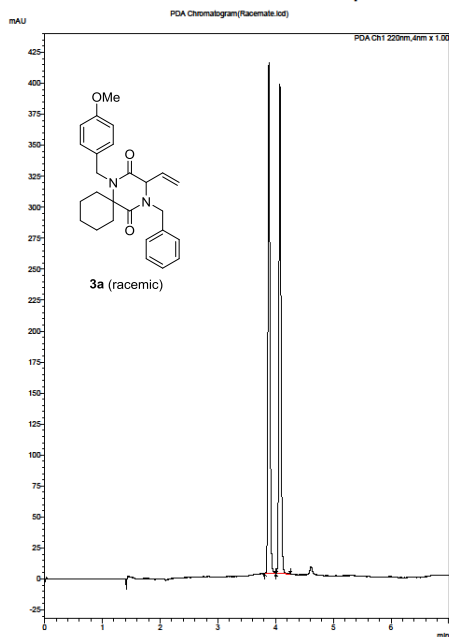

| PDA Ch1 220nm |           |         |         |
|---------------|-----------|---------|---------|
| Peak#         | Ret. Time | Area    | Area%   |
| 1             | 3.884     | 981263  | 49.889  |
| 2             | 4.075     | 985629  | 50.111  |
| Total         |           | 1966892 | 100.000 |

==== Shimadzu LabSolutions Browser Report ====

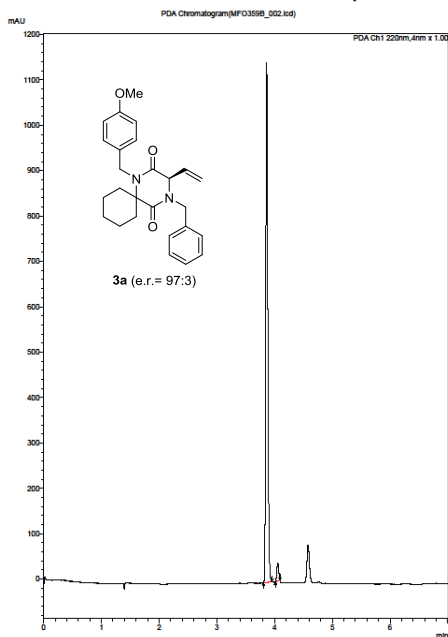

| PDA Ch1 272nm |           |        |         |
|---------------|-----------|--------|---------|
| Peak#         | Ret. Time | Area   | Area%   |
| 1             | 3.863     | 256464 | 96.916  |
| 2             | 4.055     | 8160   | 3.084   |
| Total         |           | 264624 | 100.000 |

# NMR Spectra

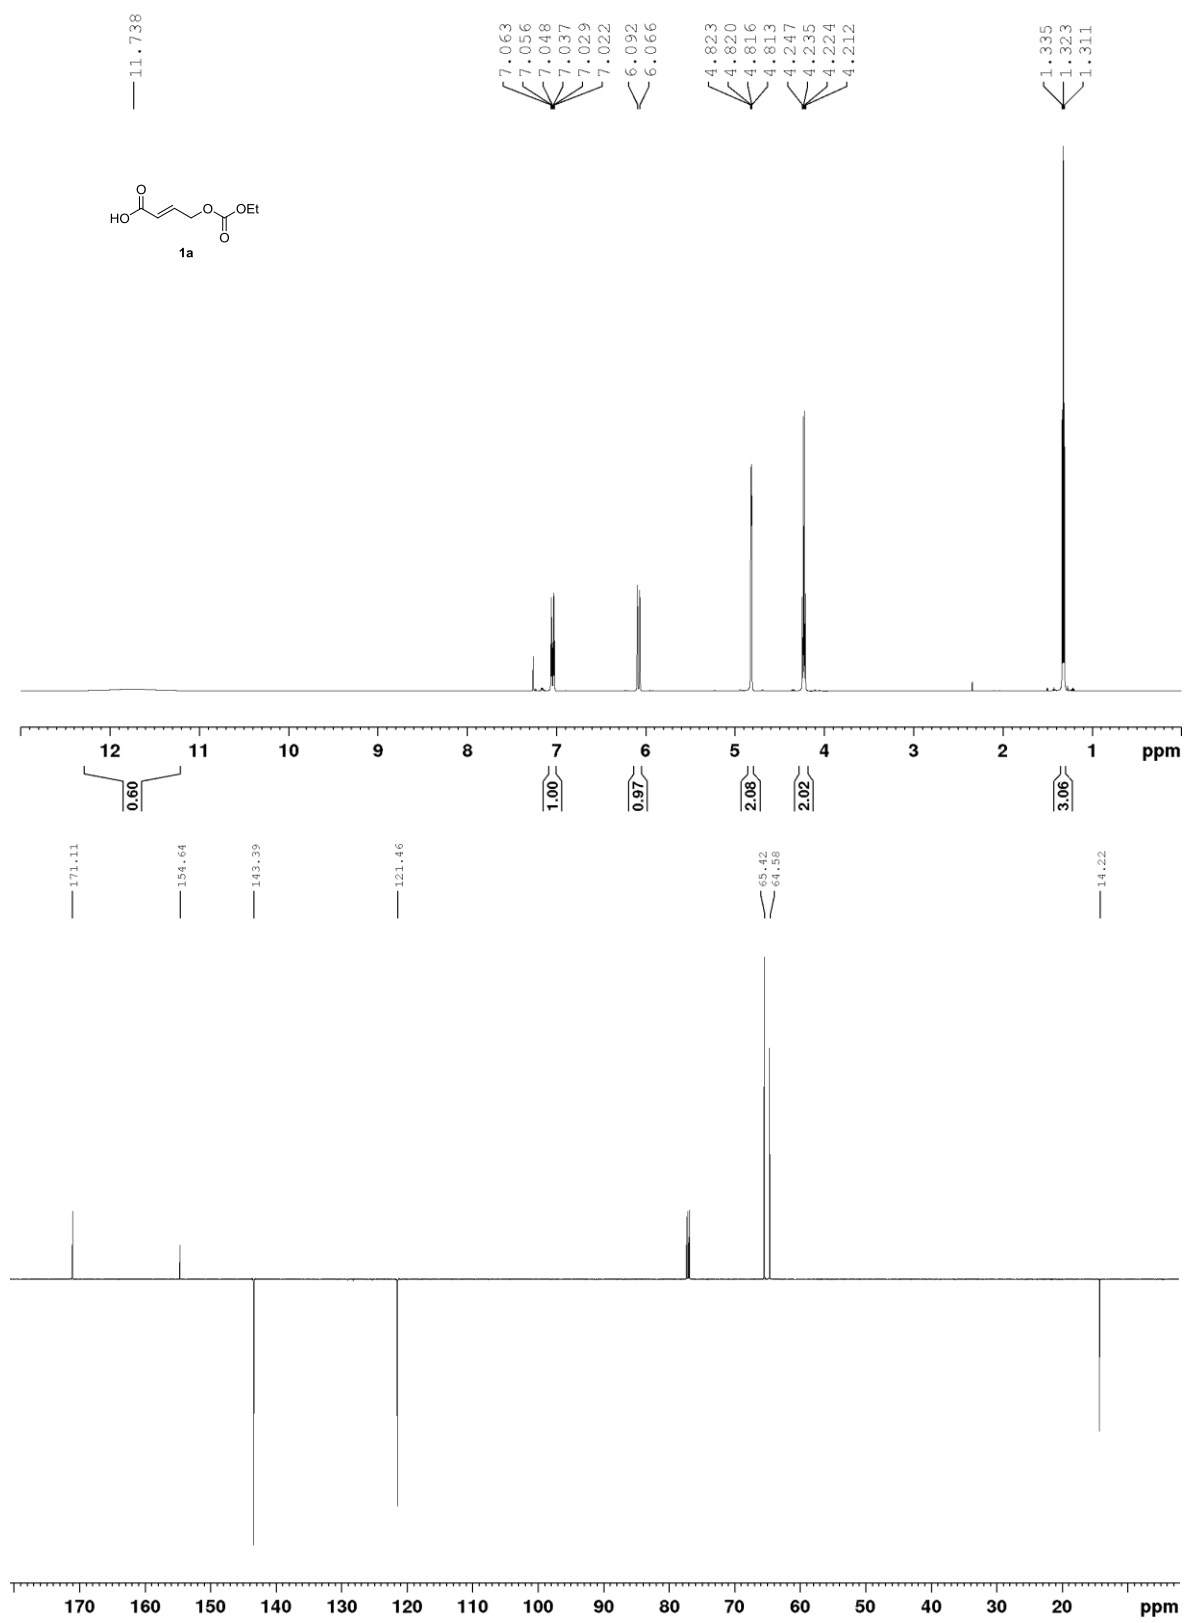



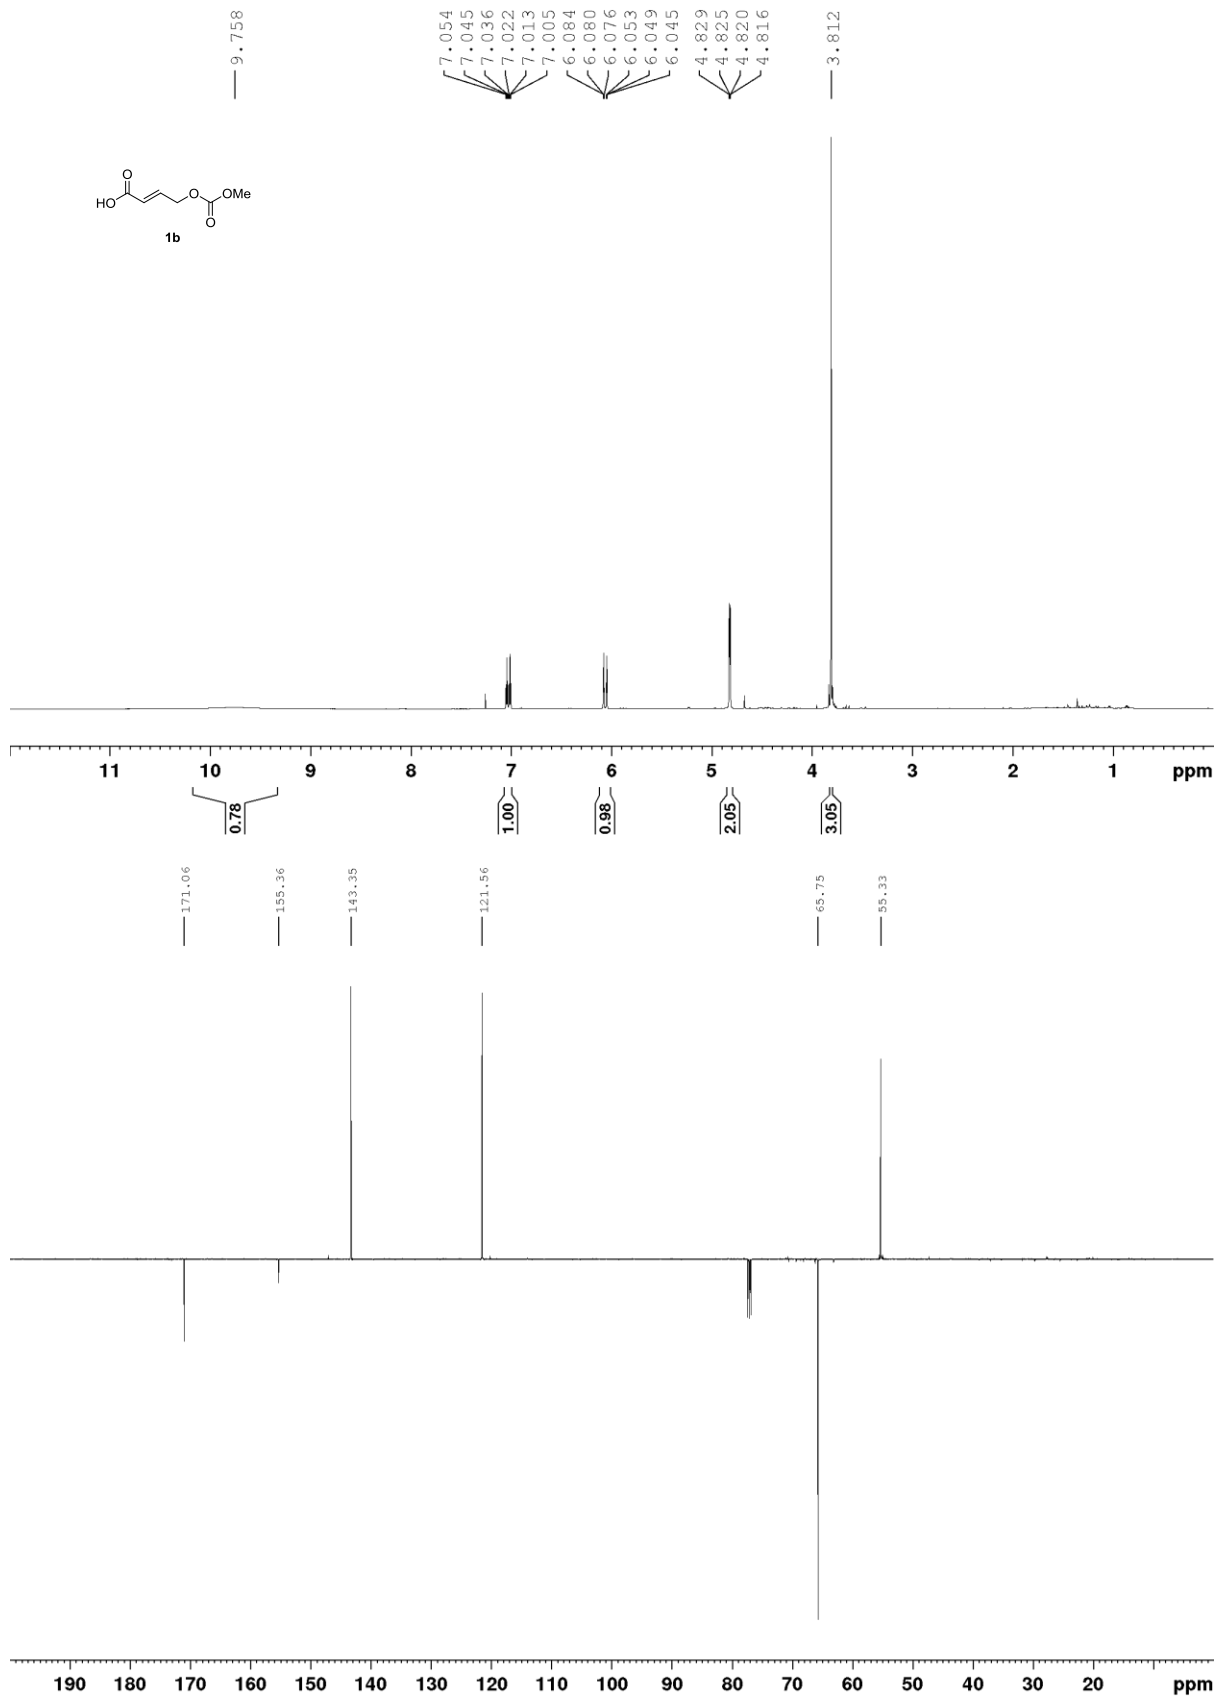

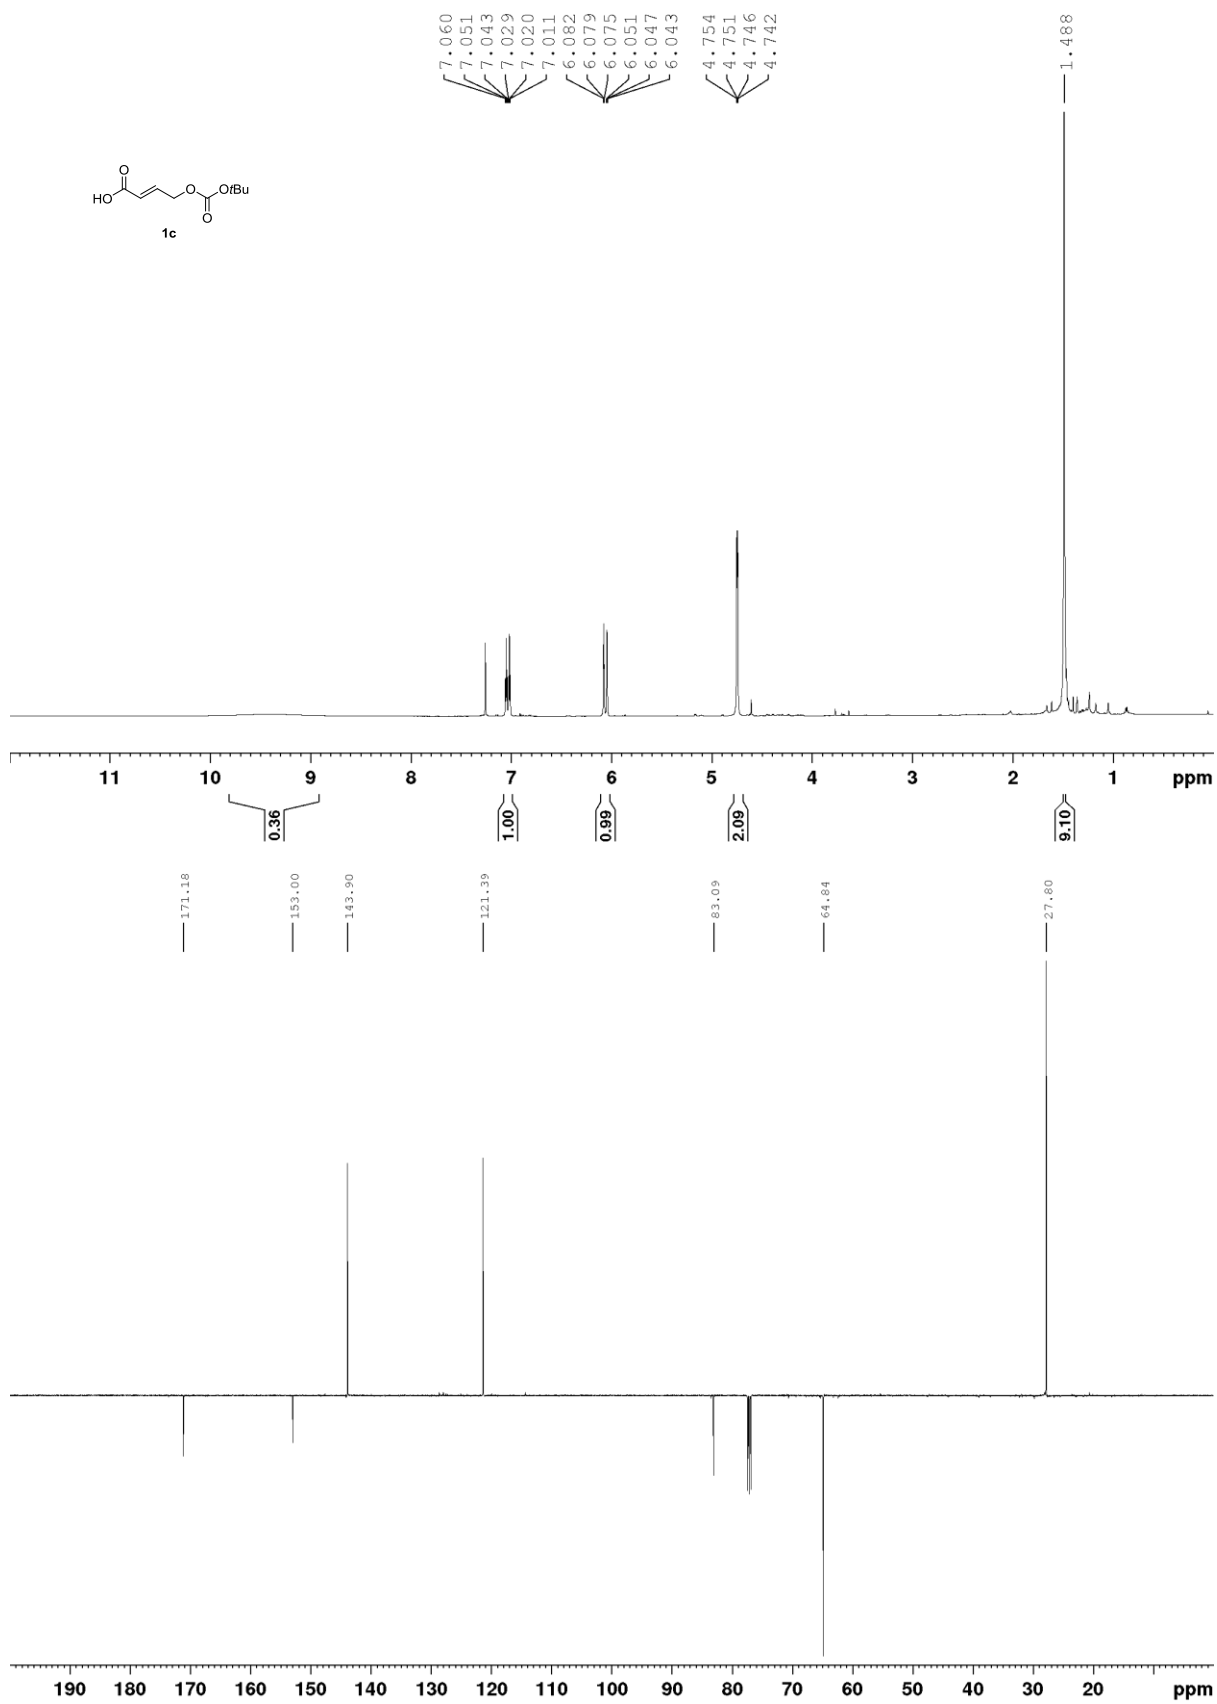

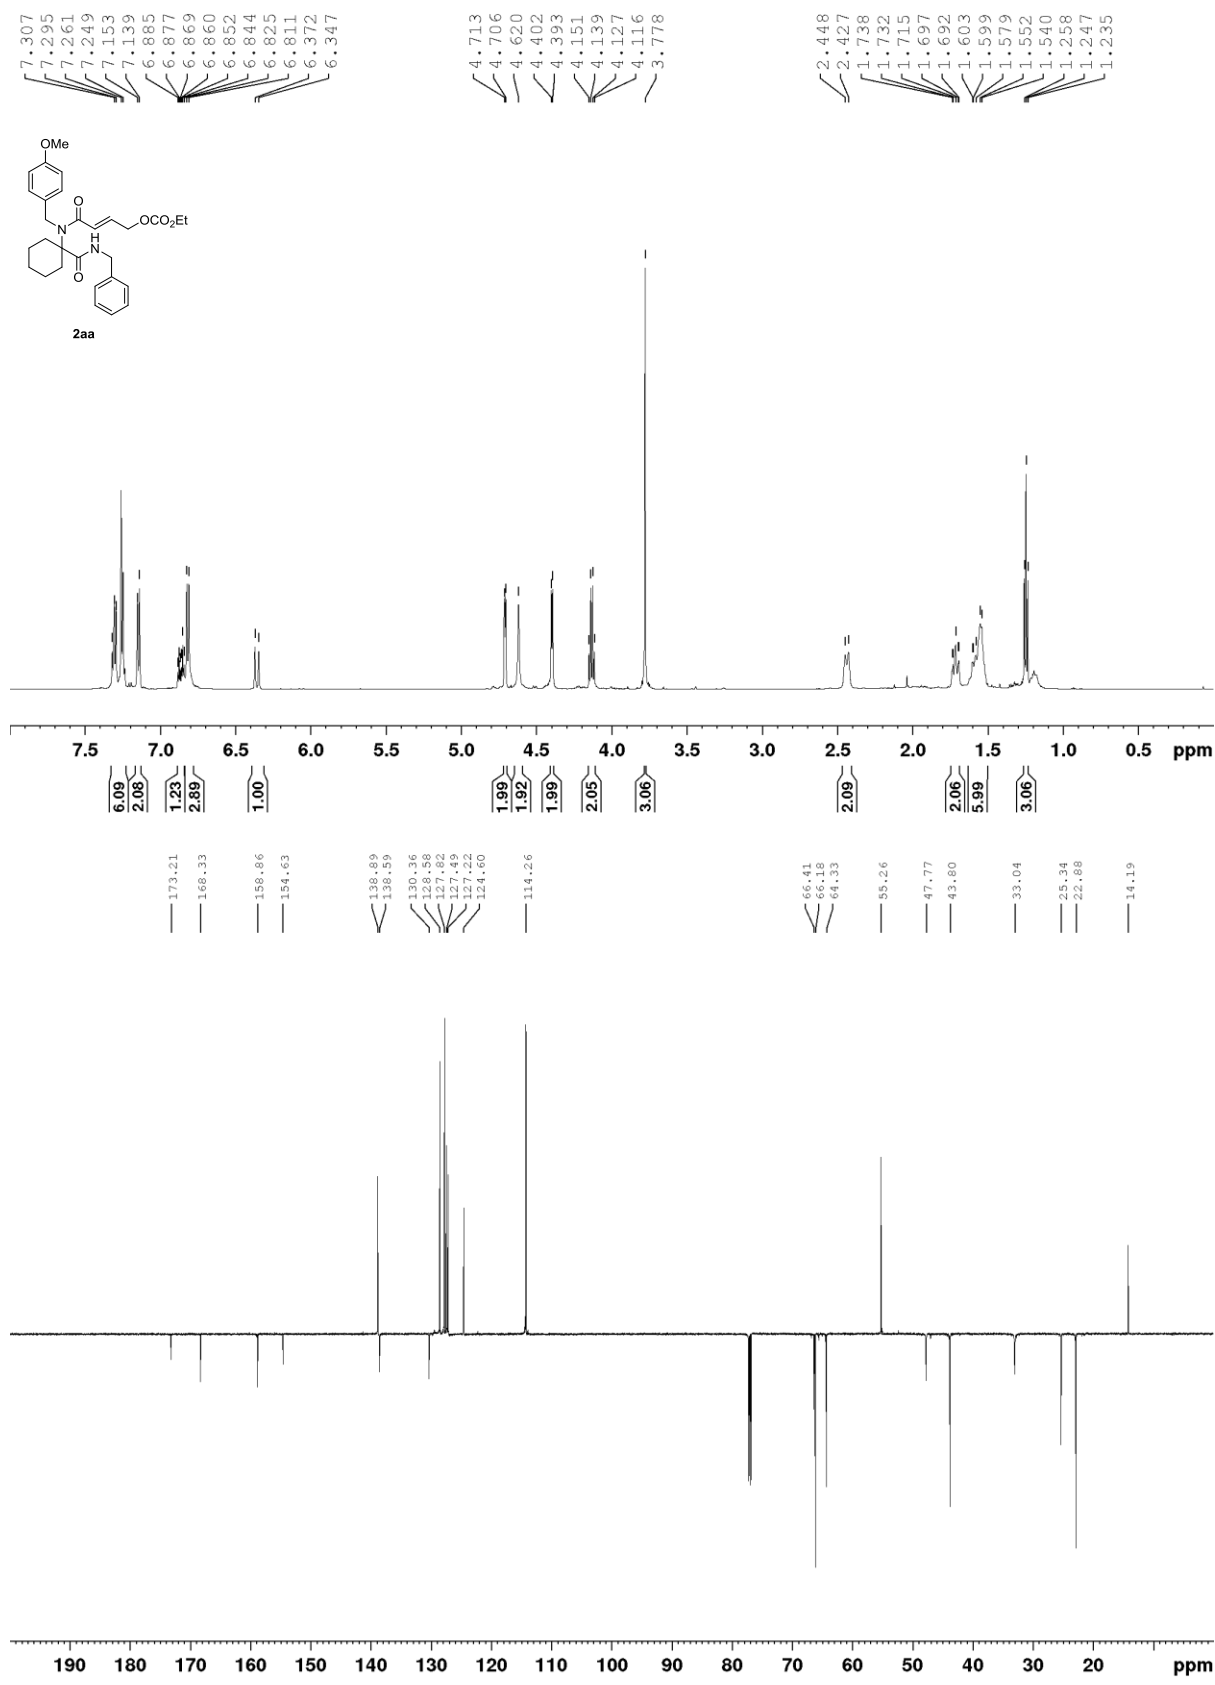

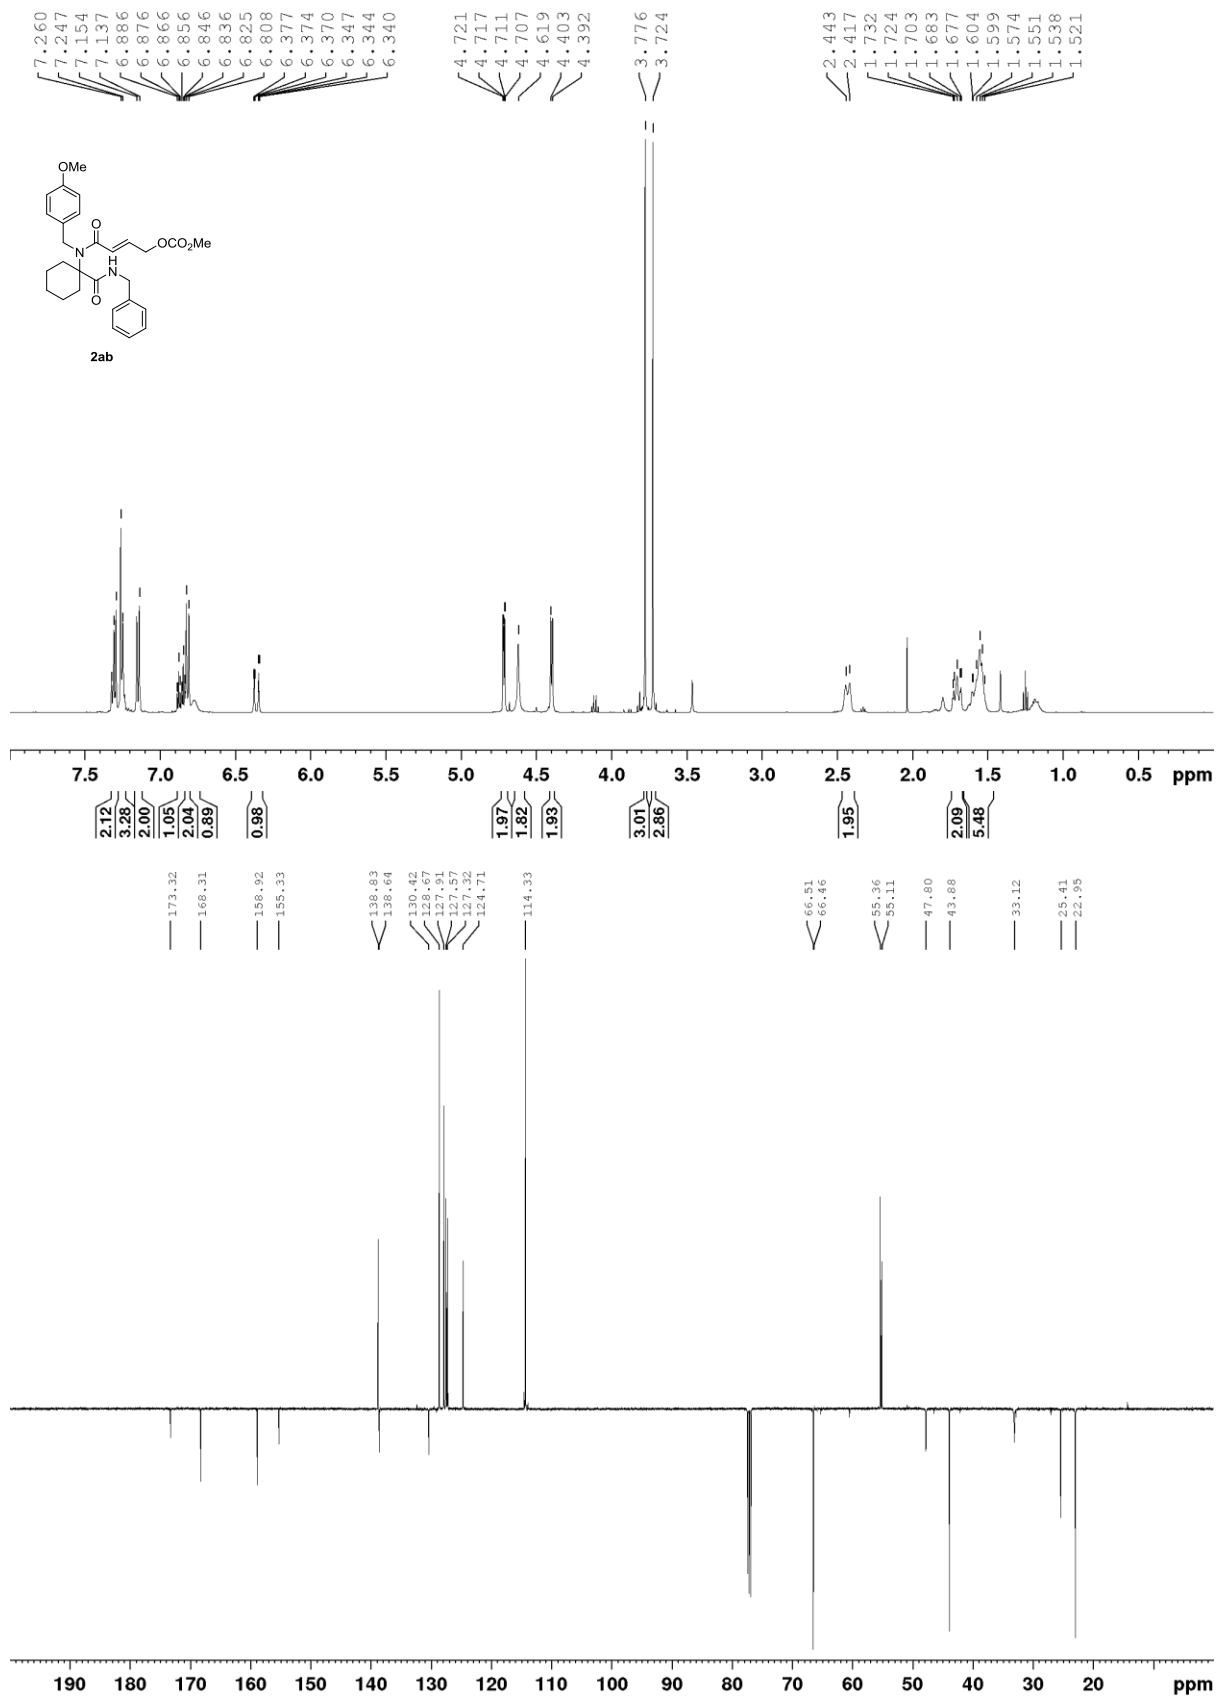

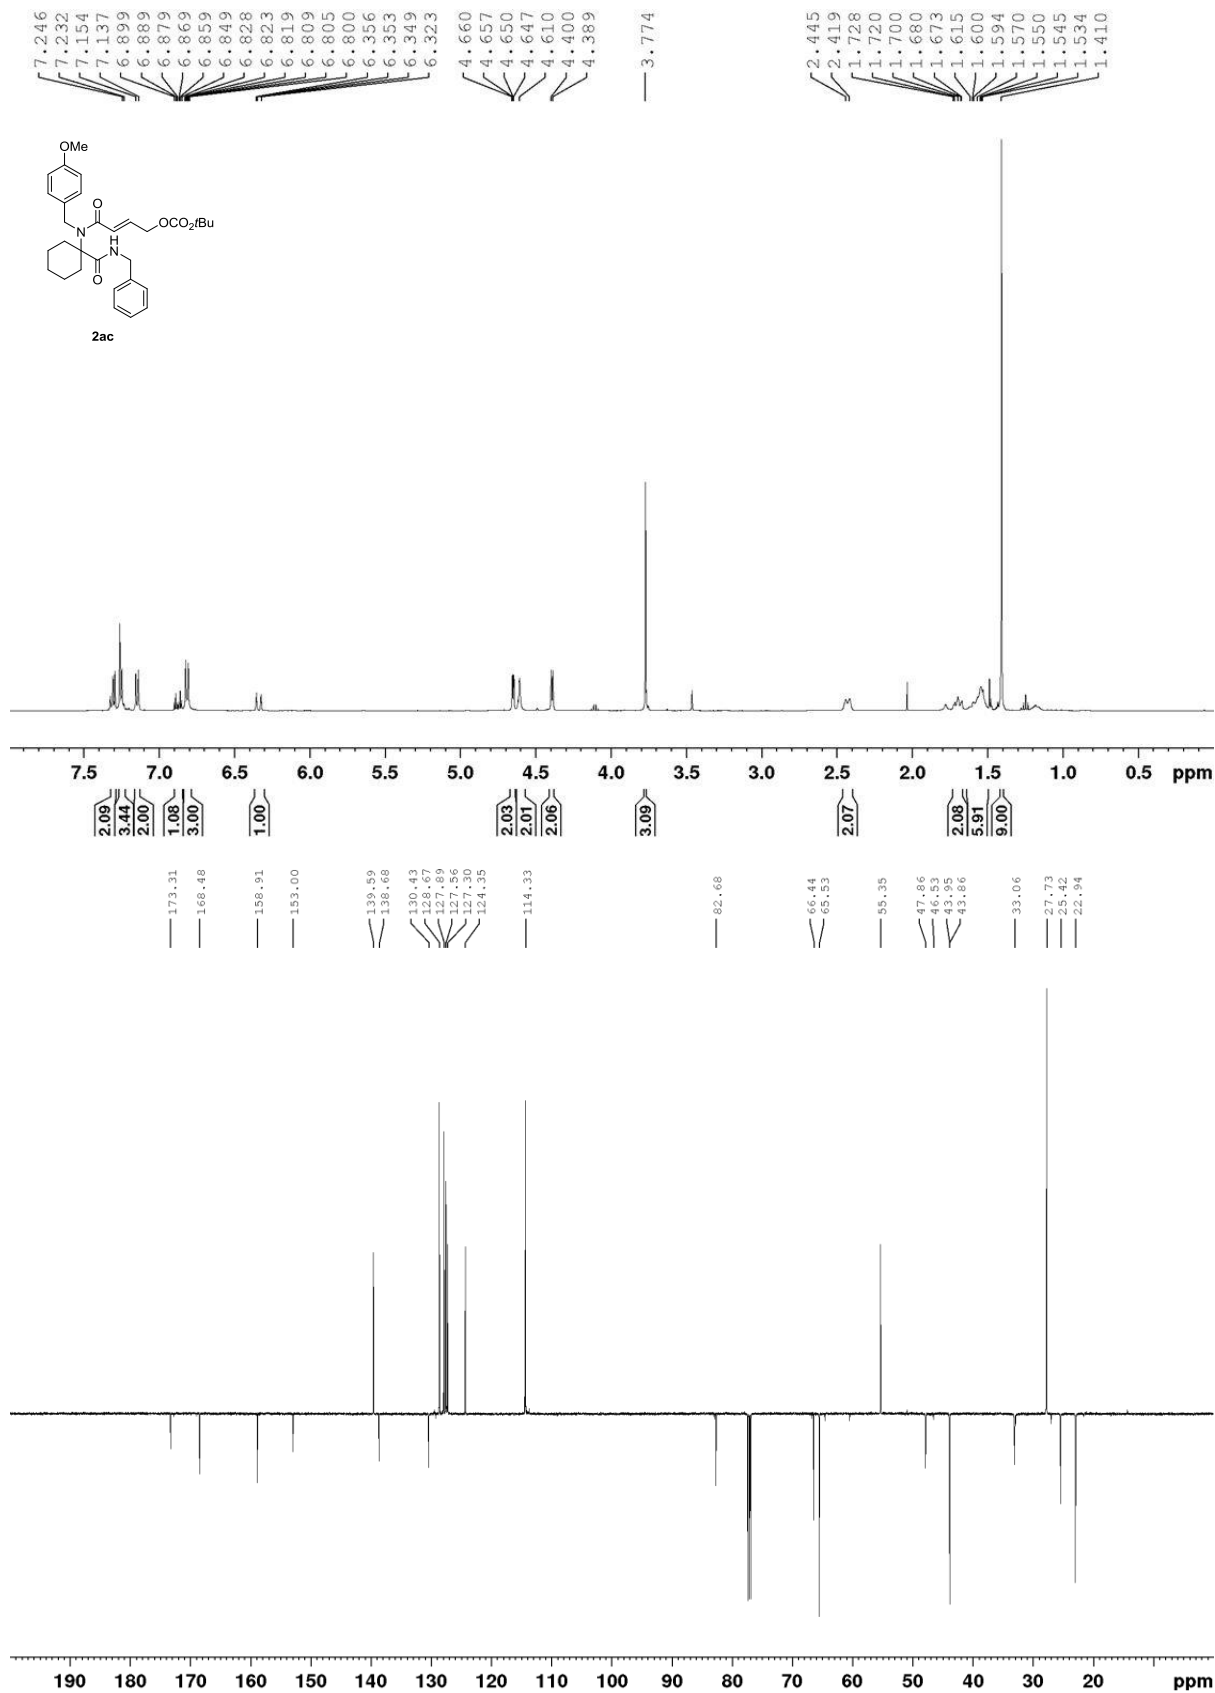

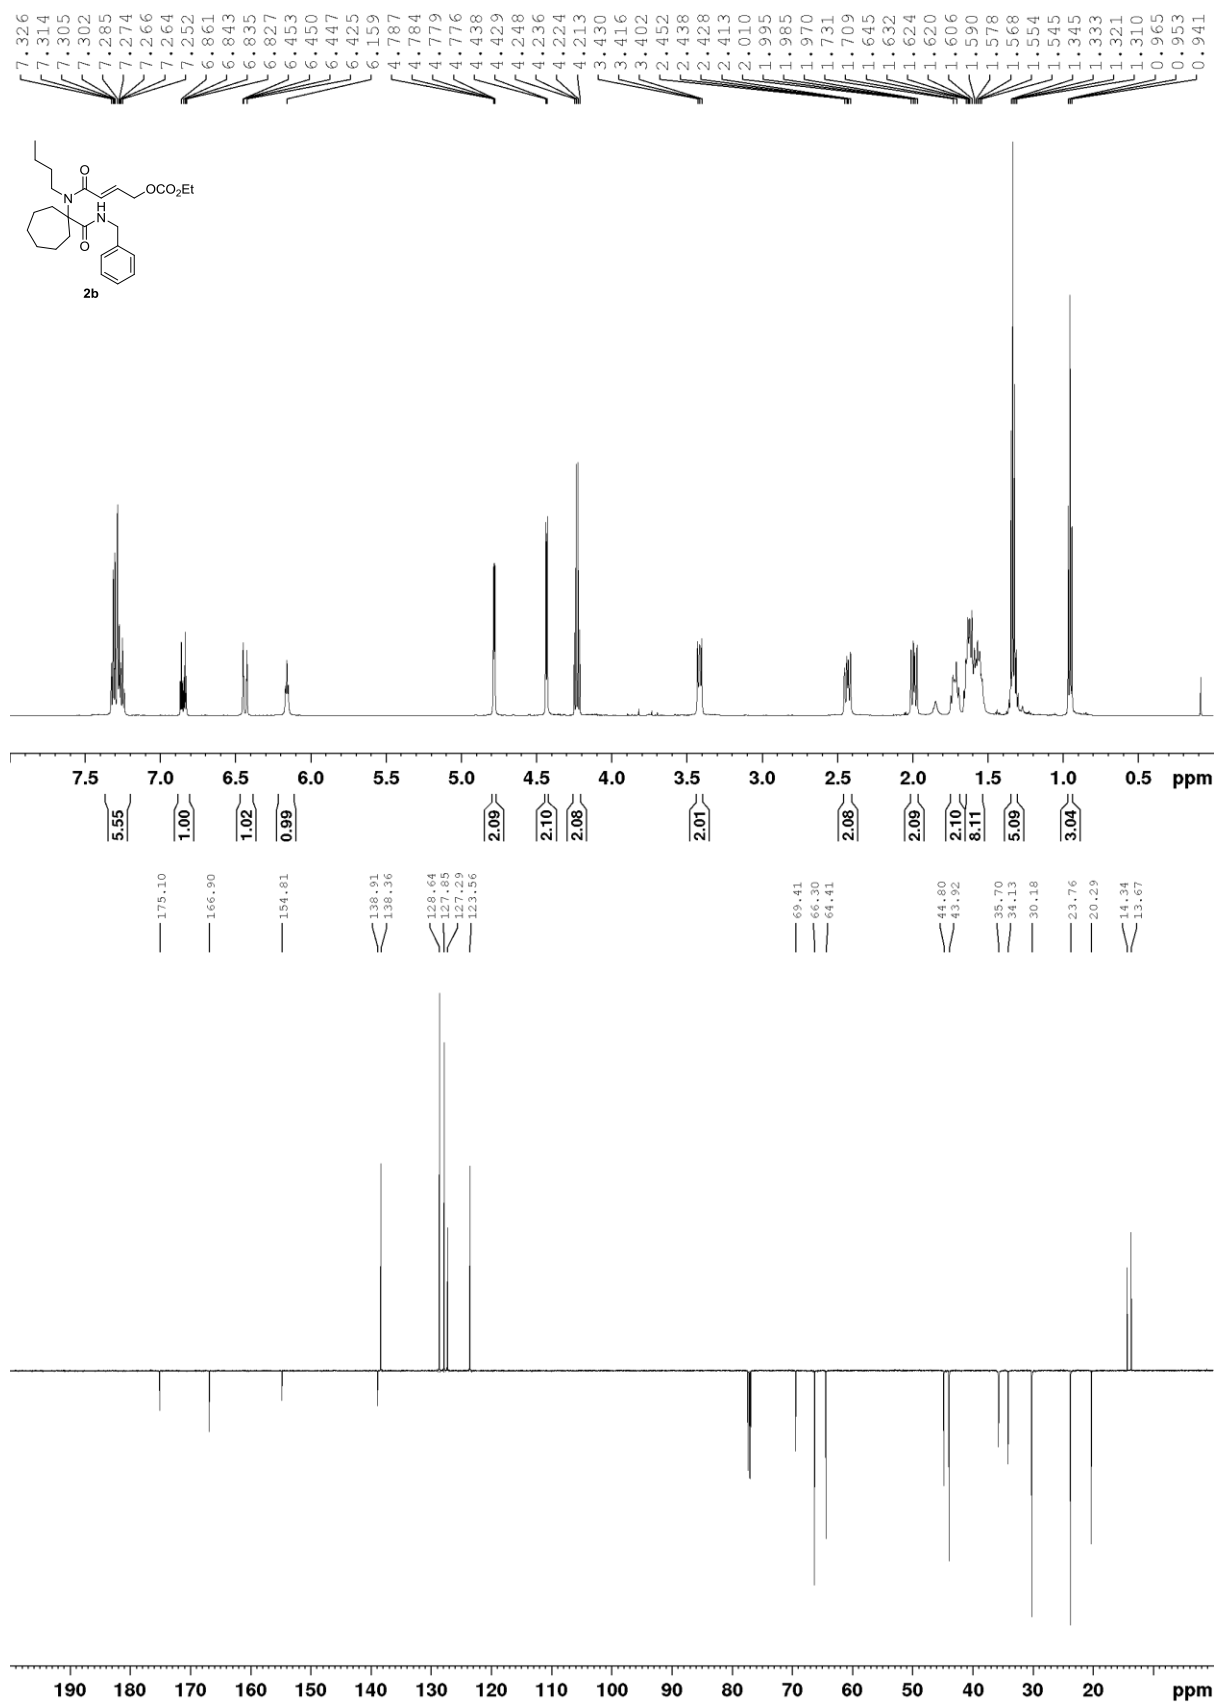

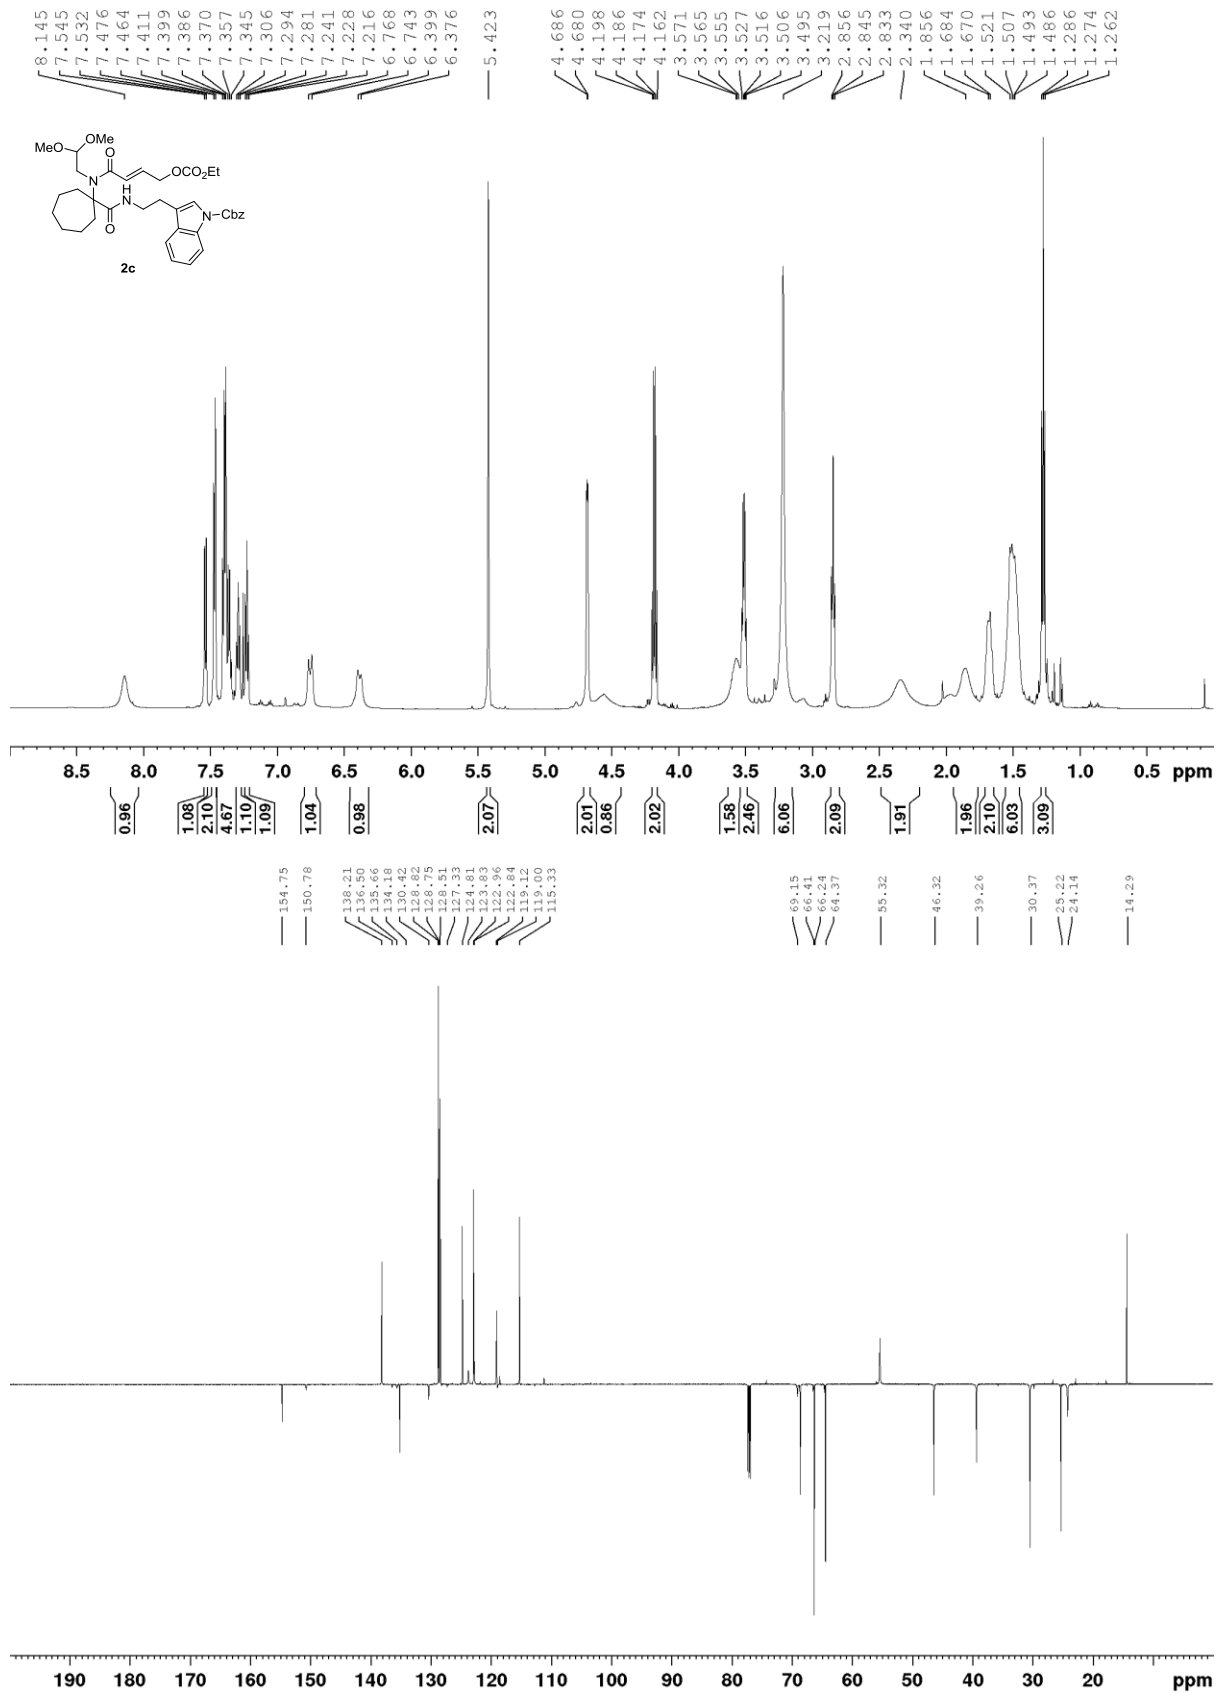

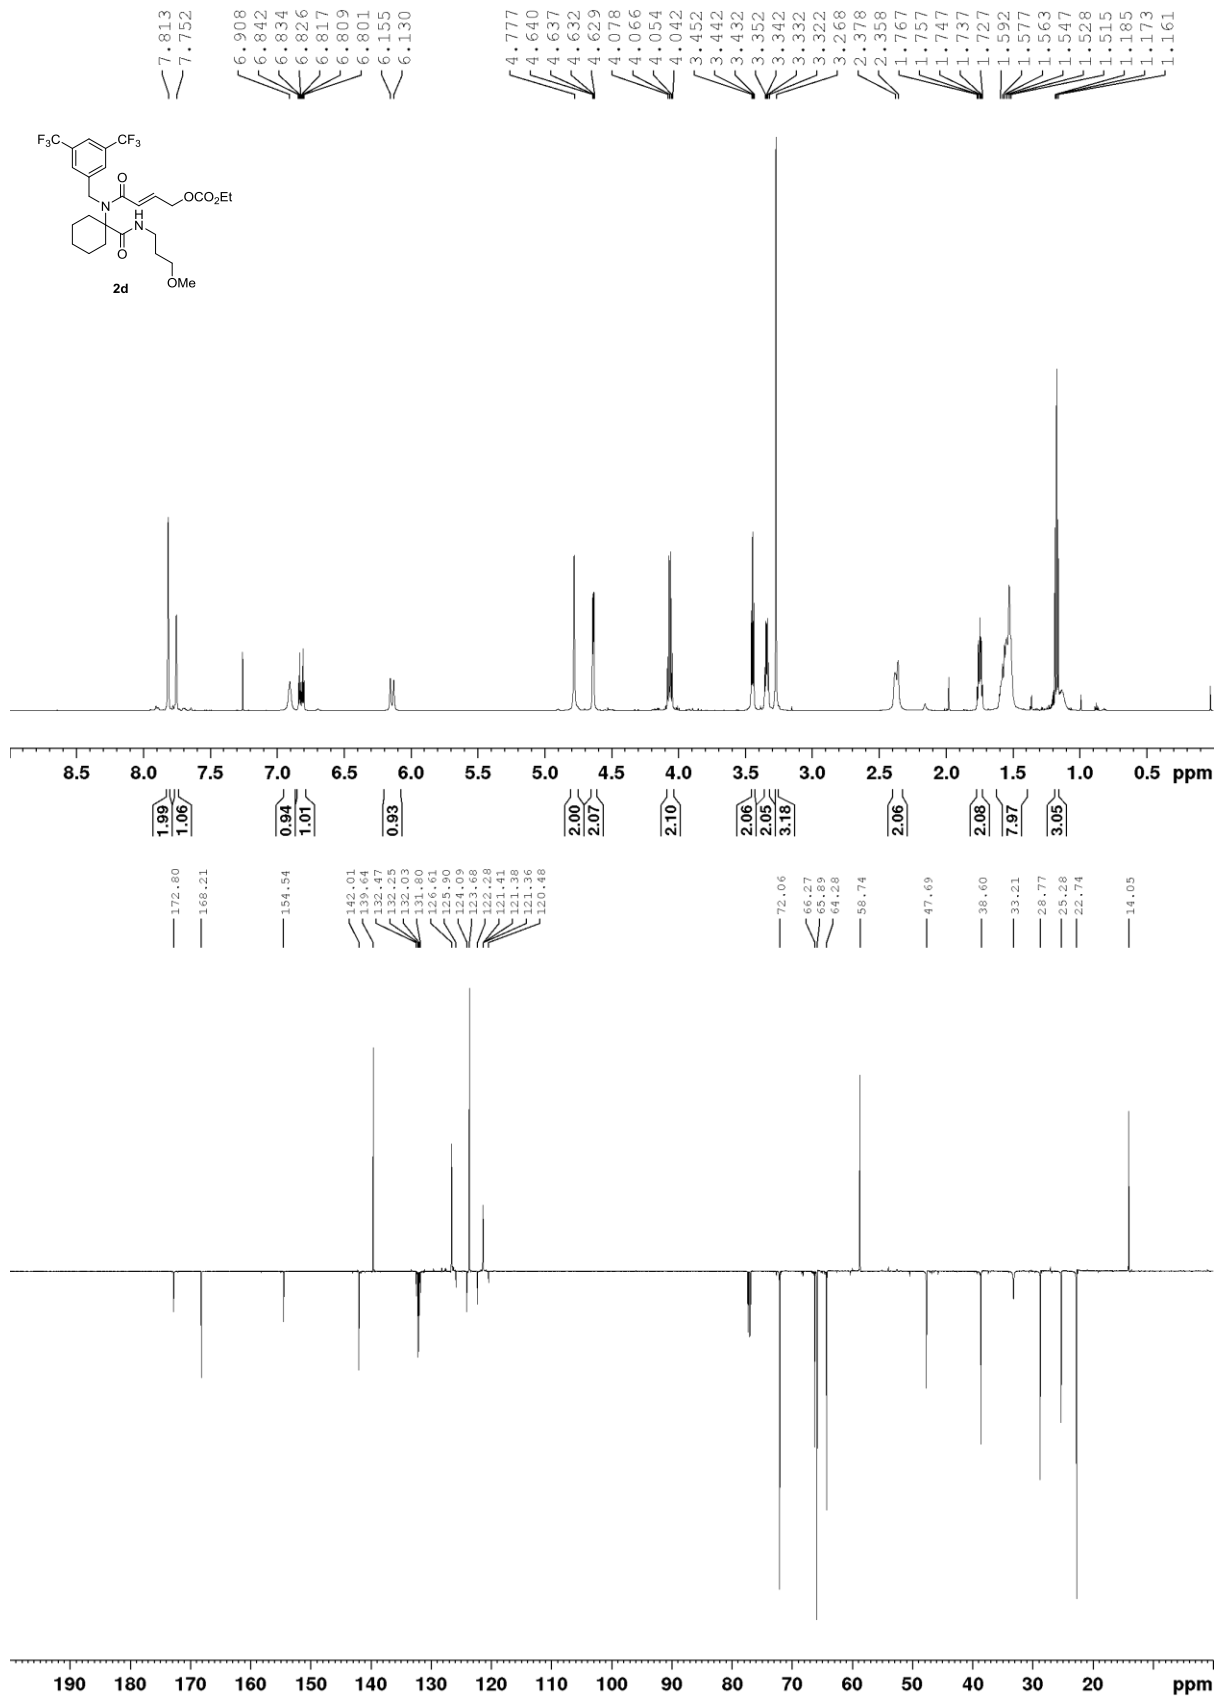



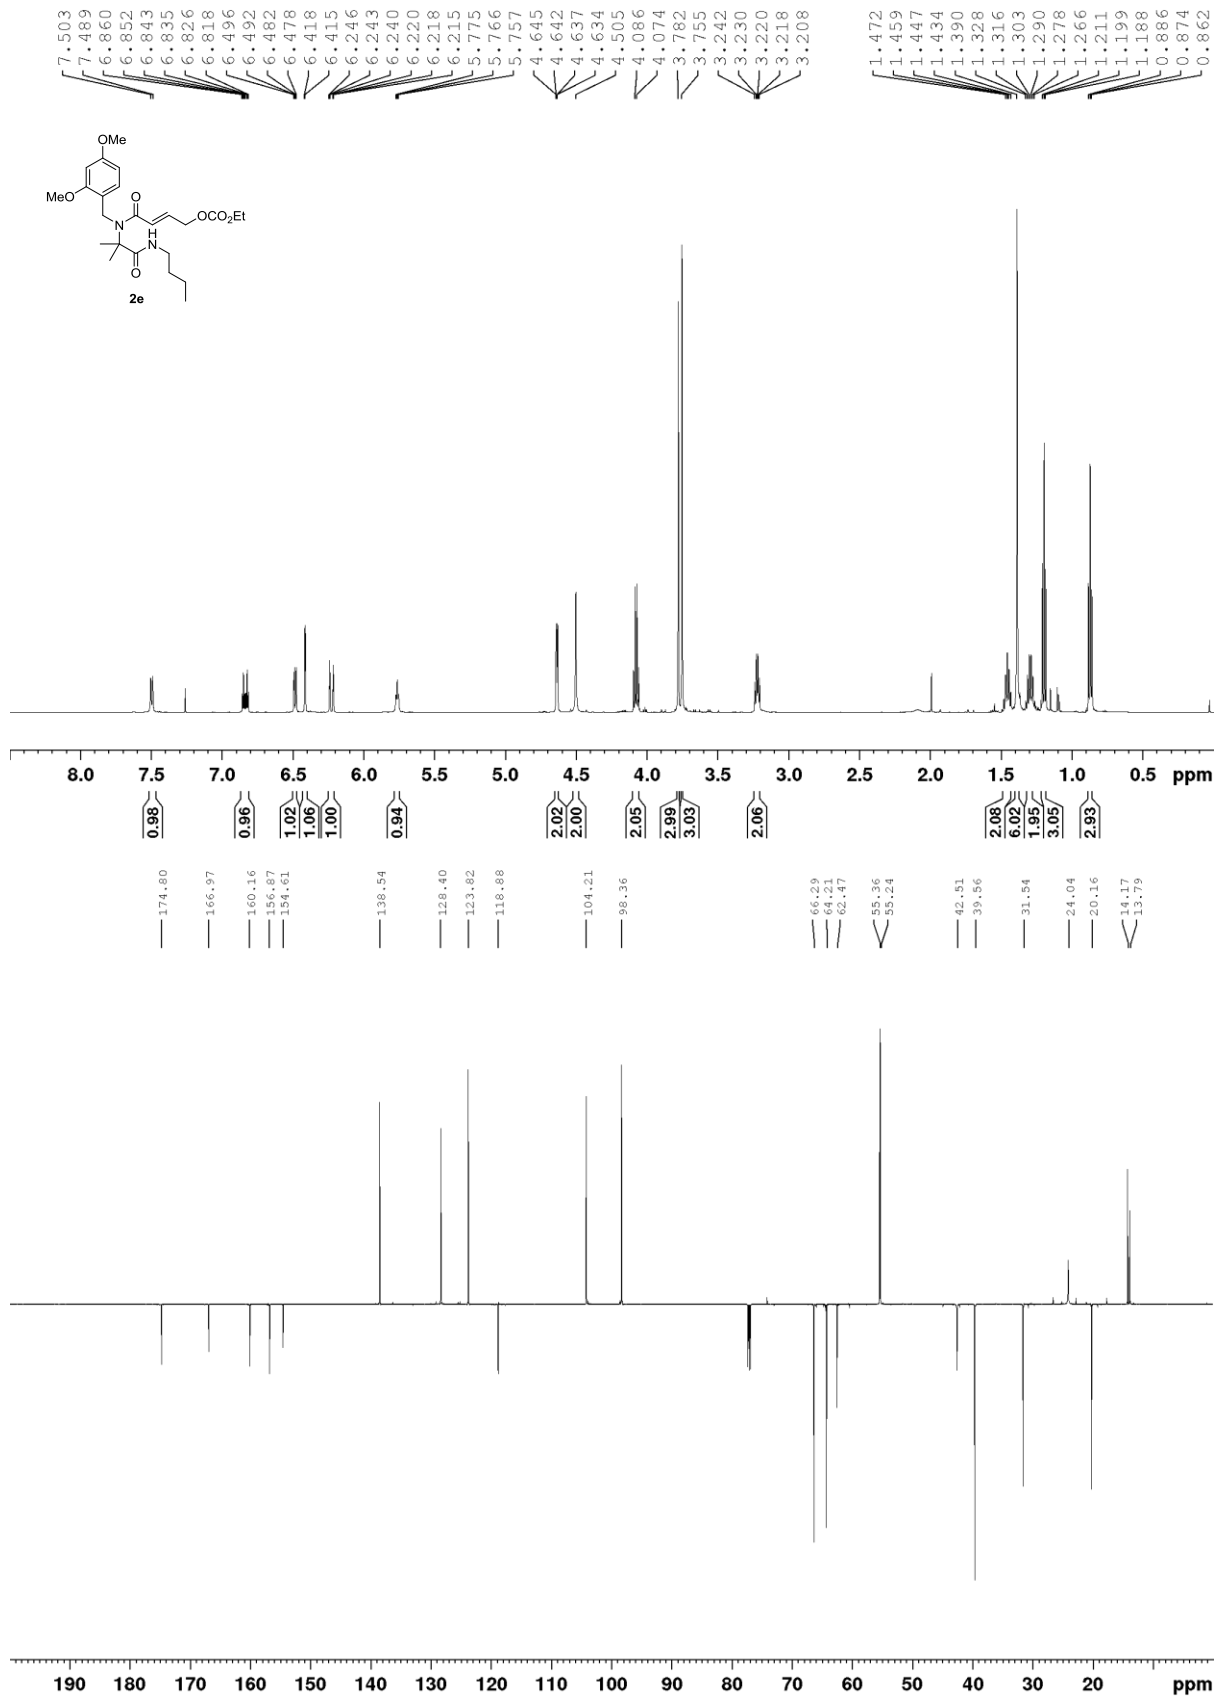

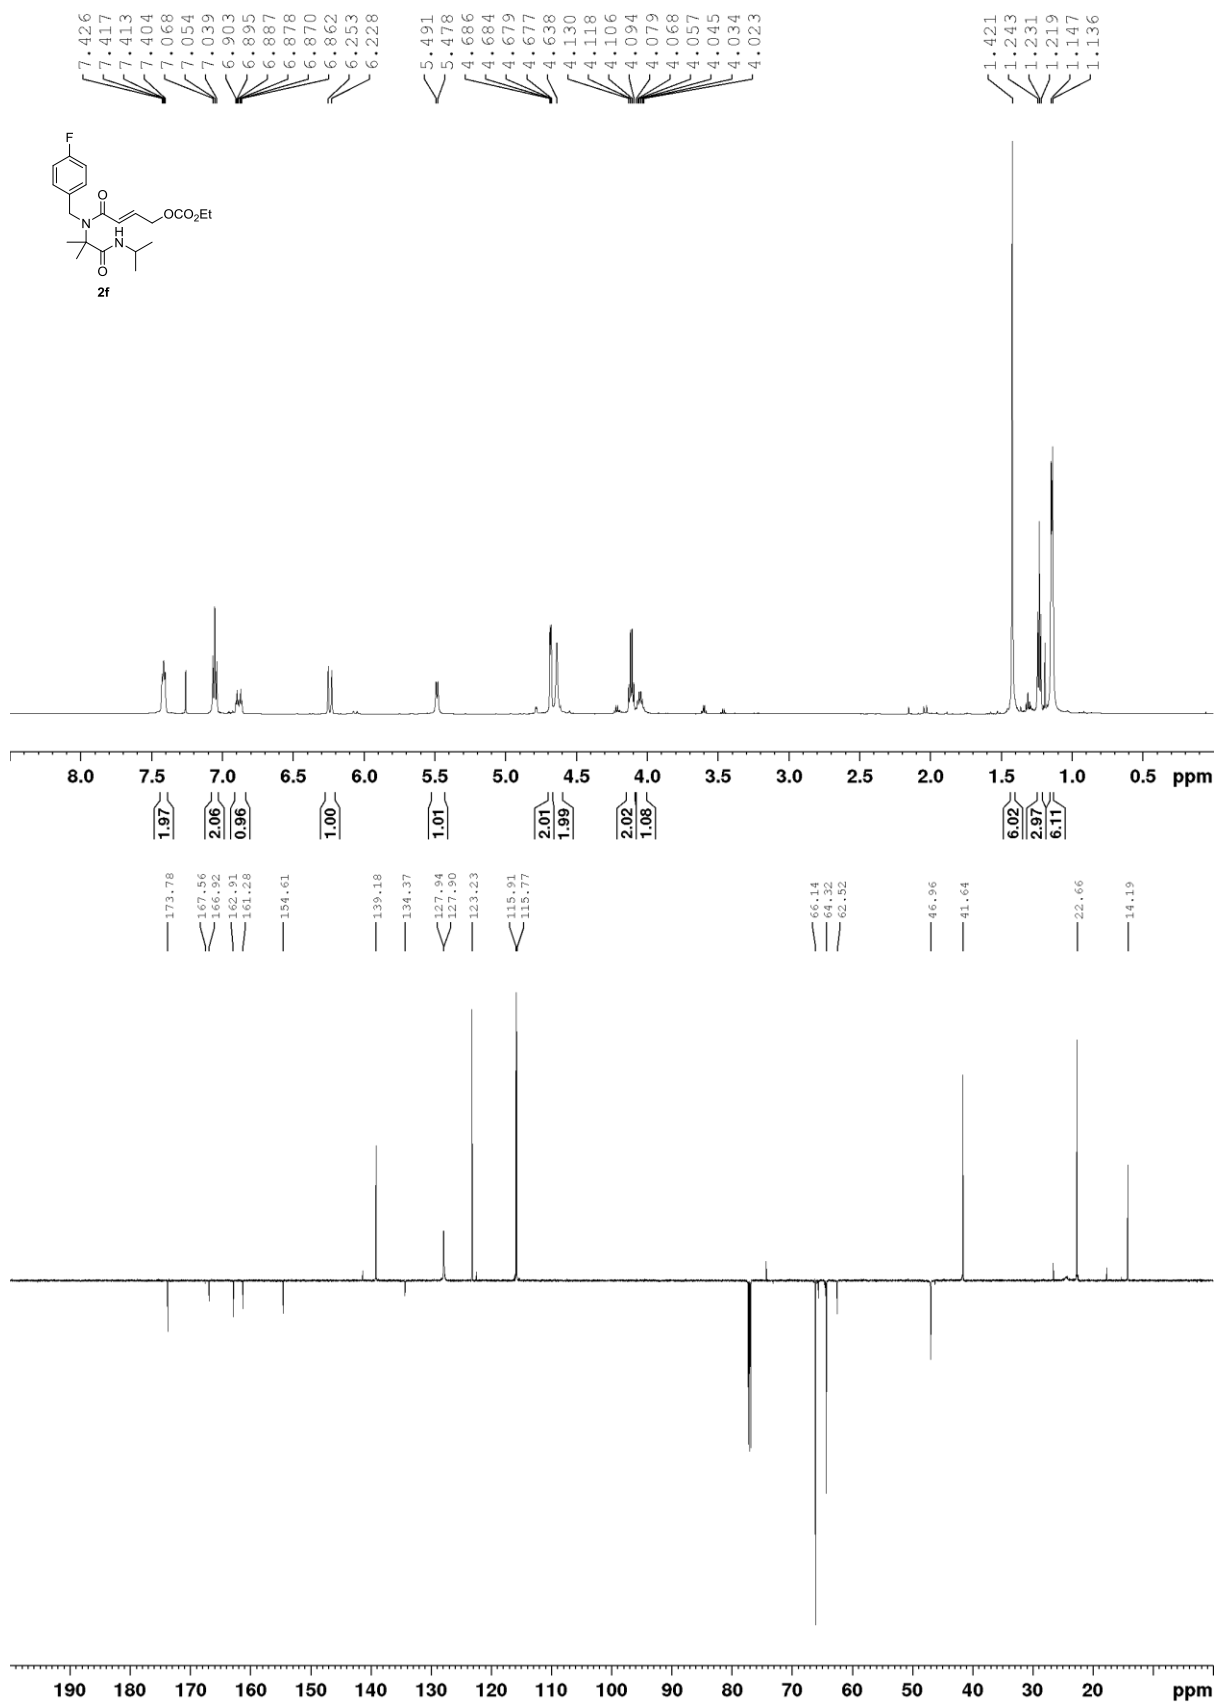

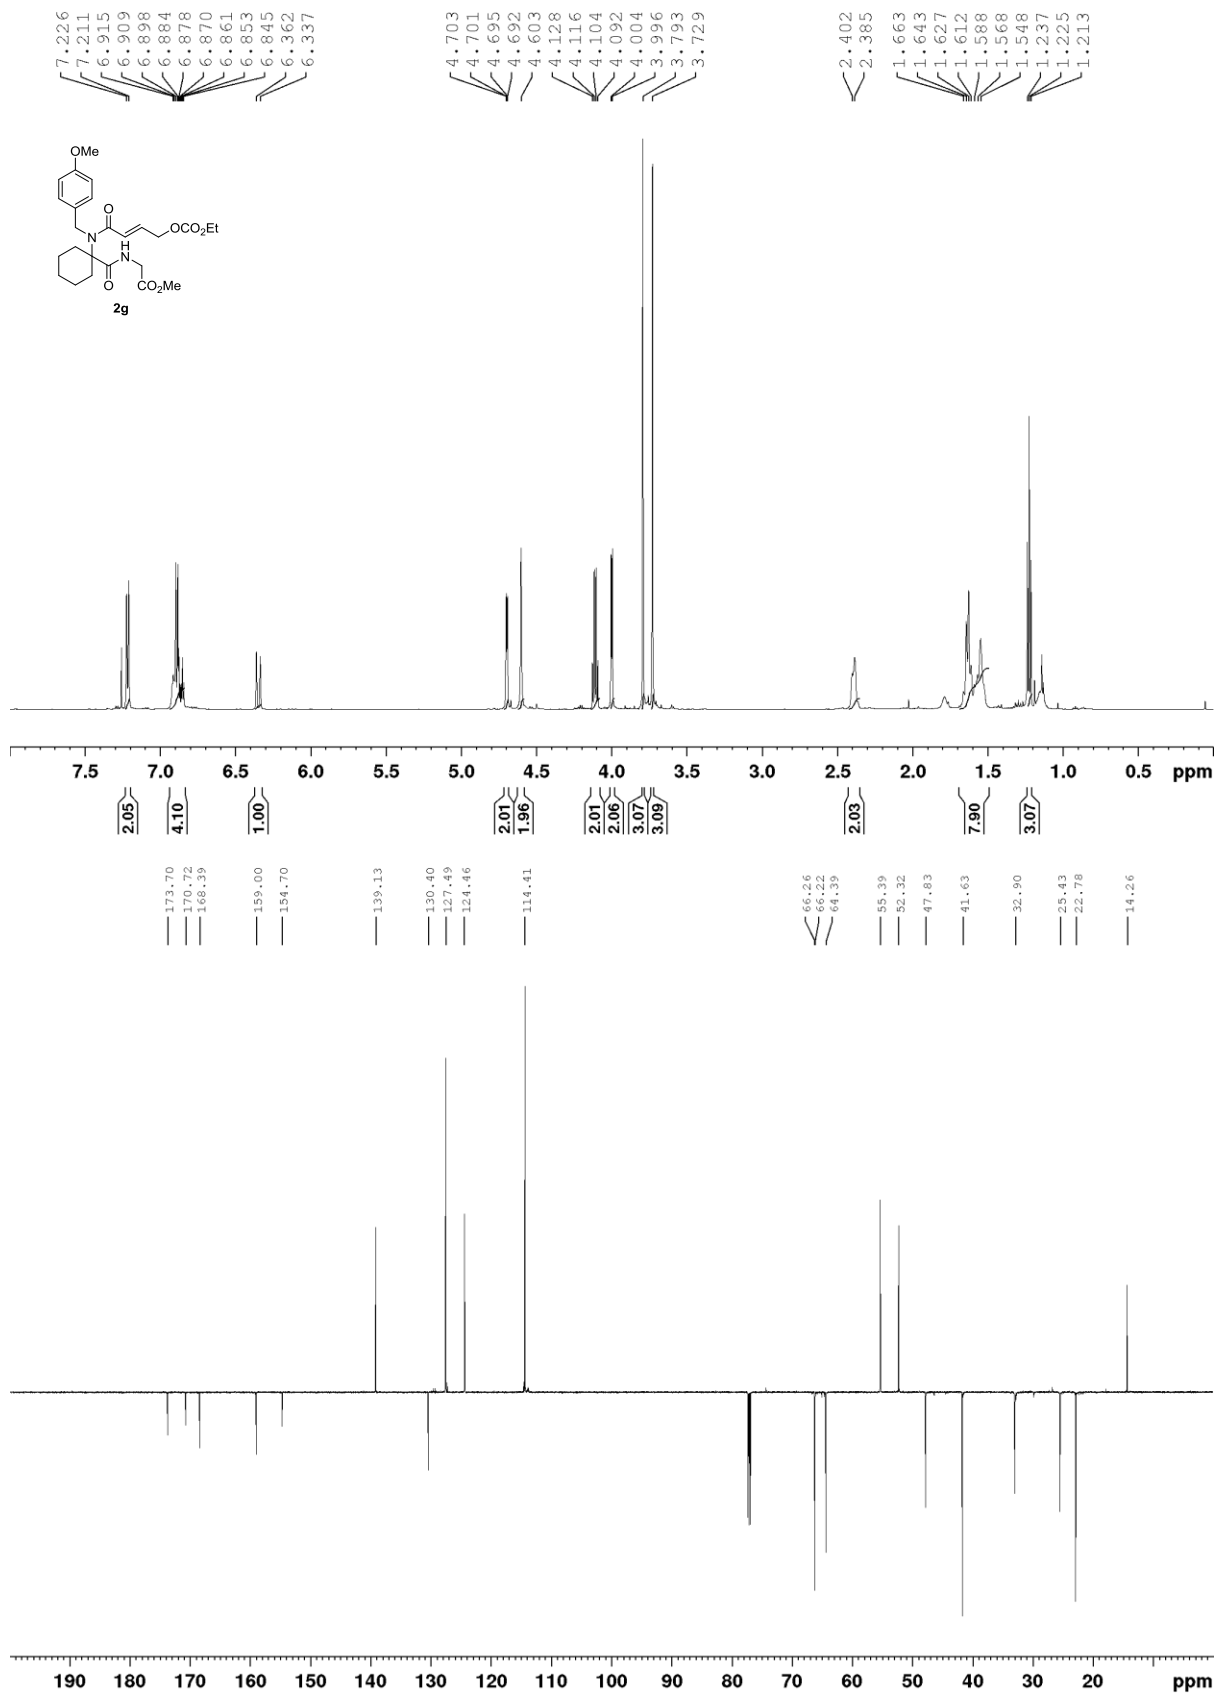

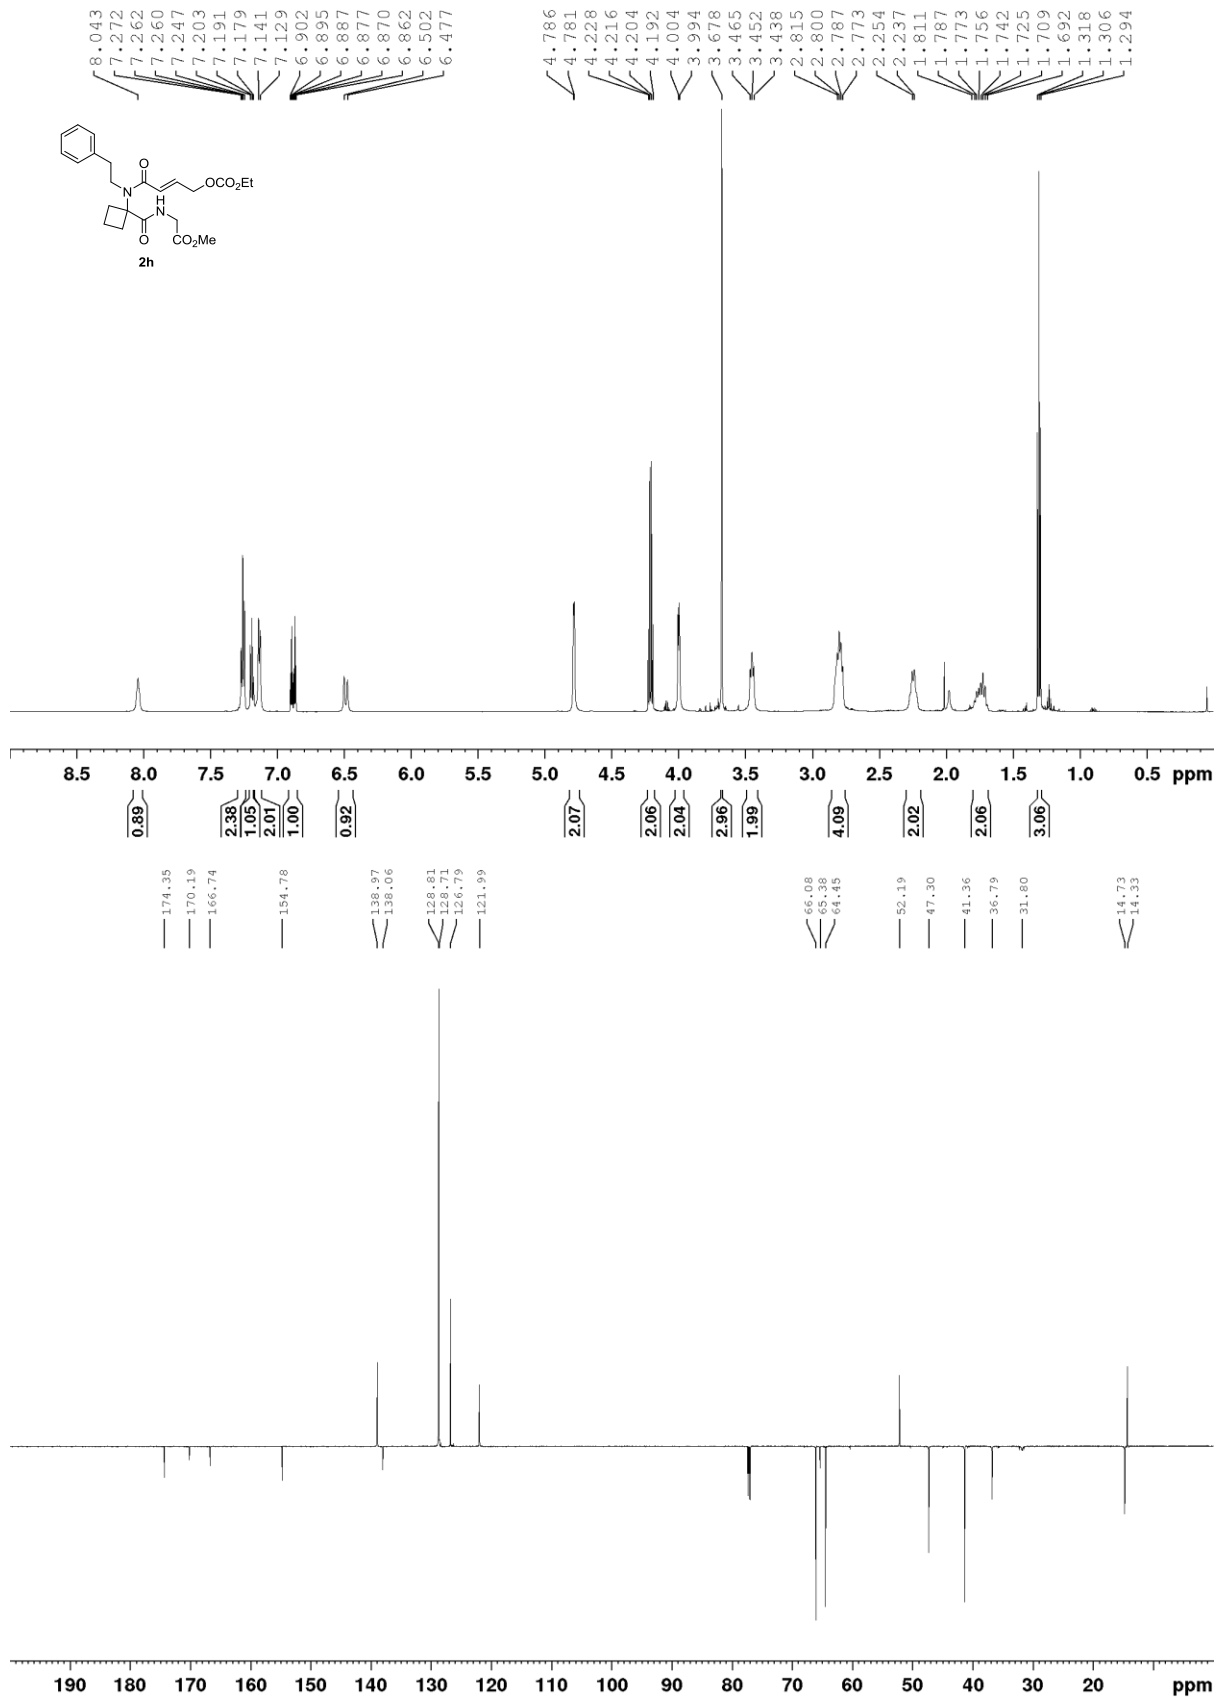

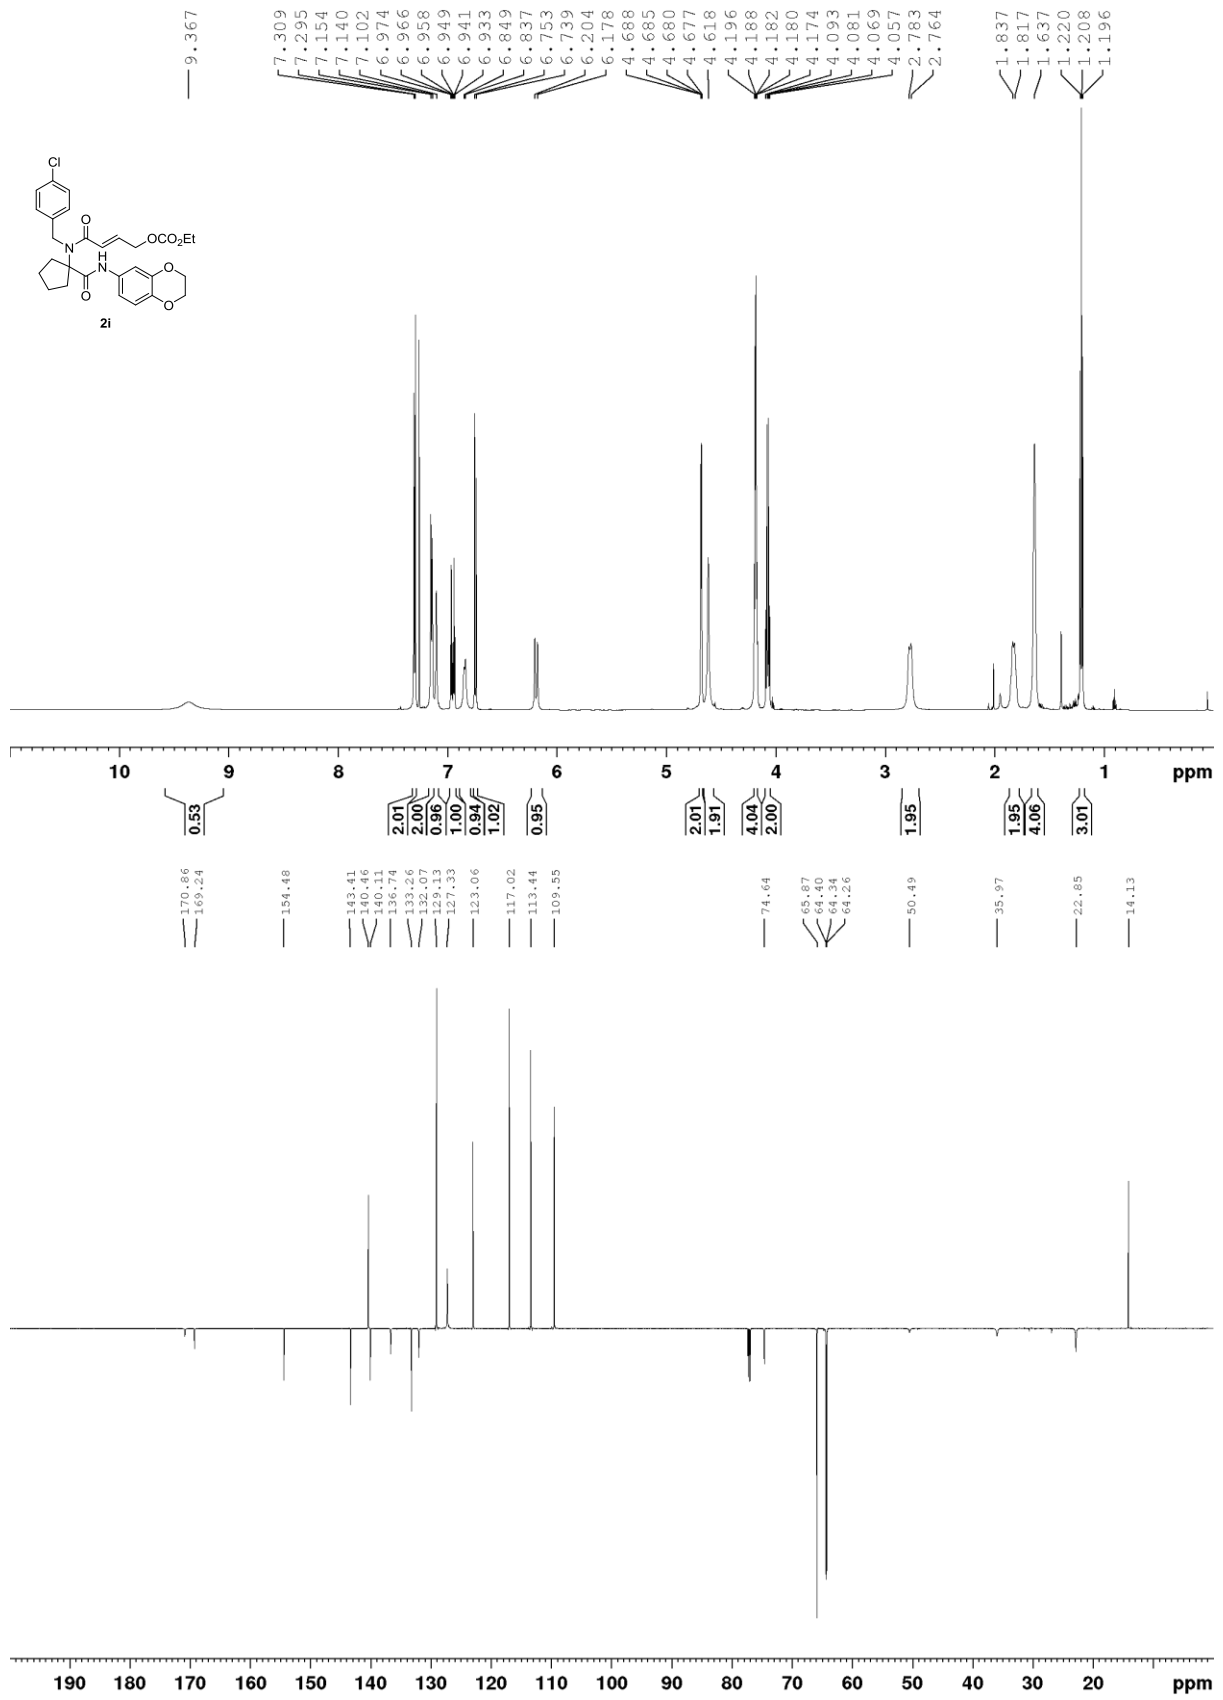

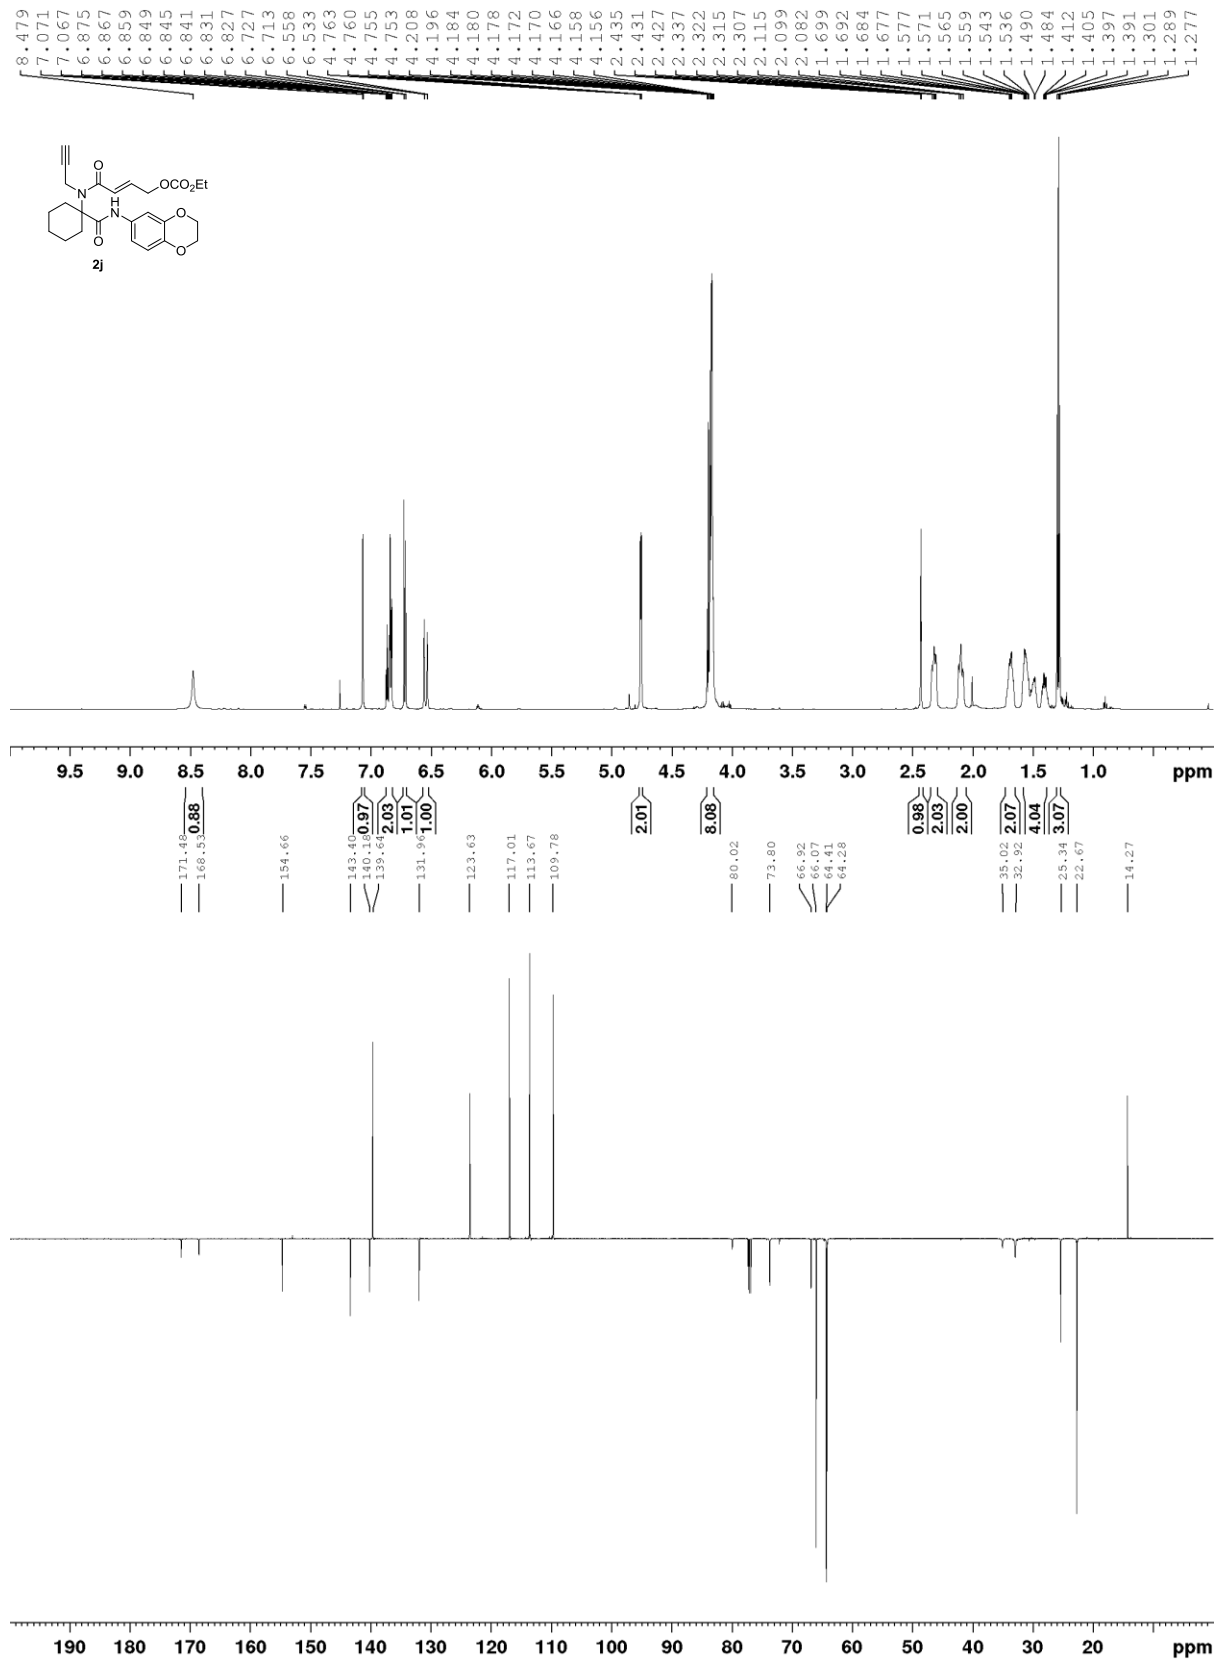

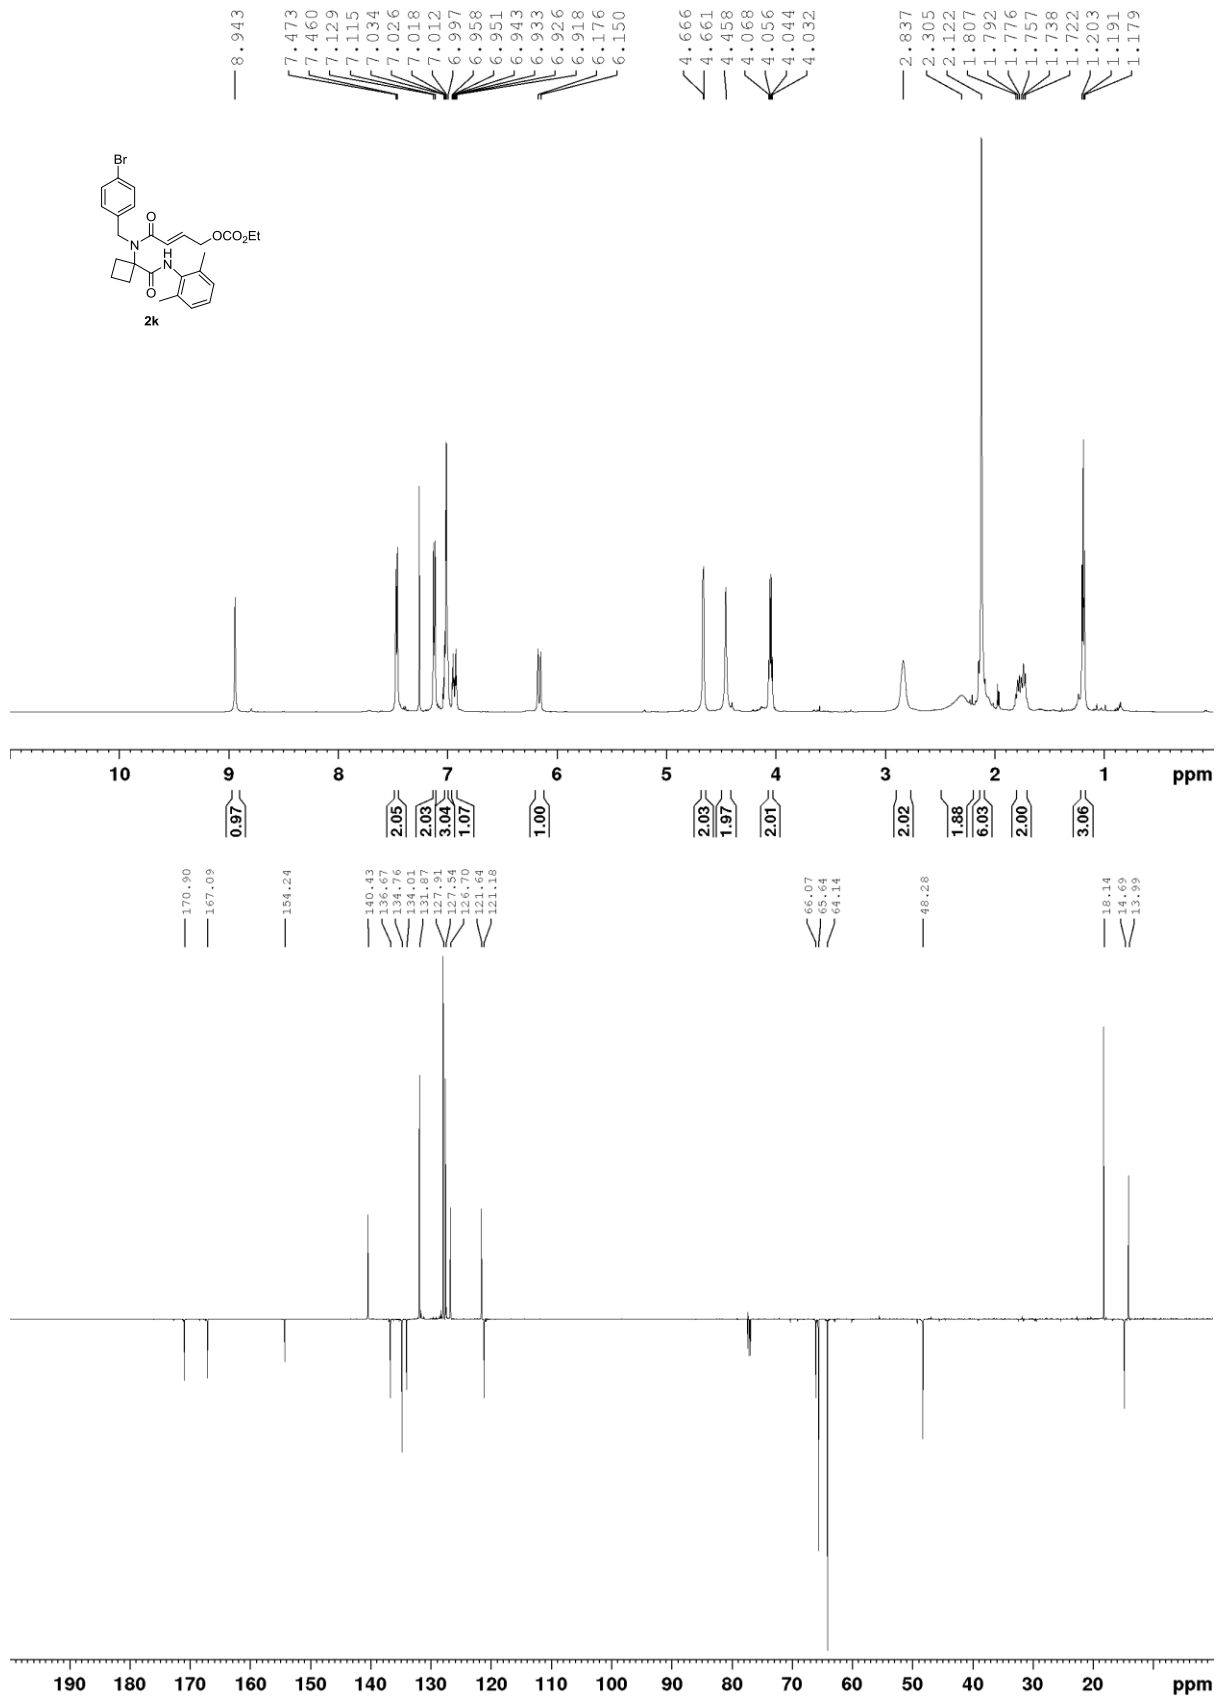

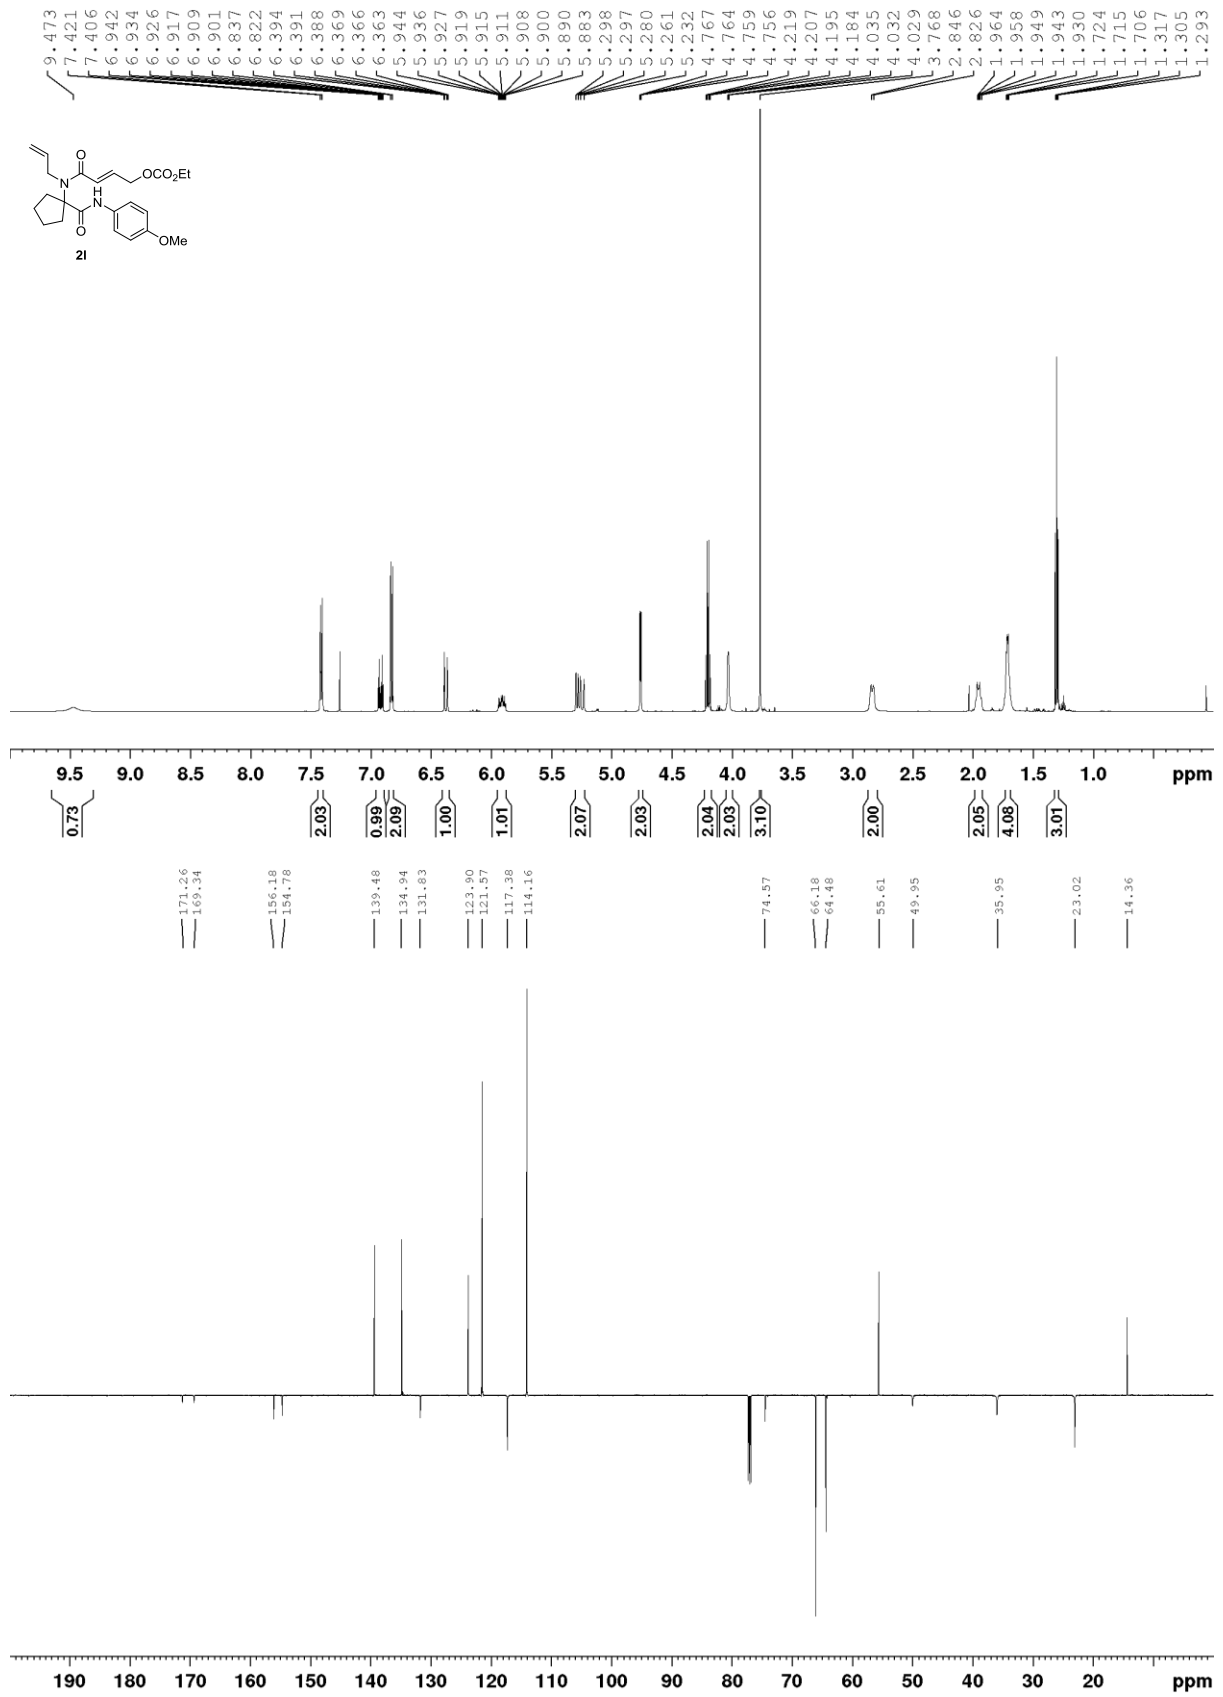



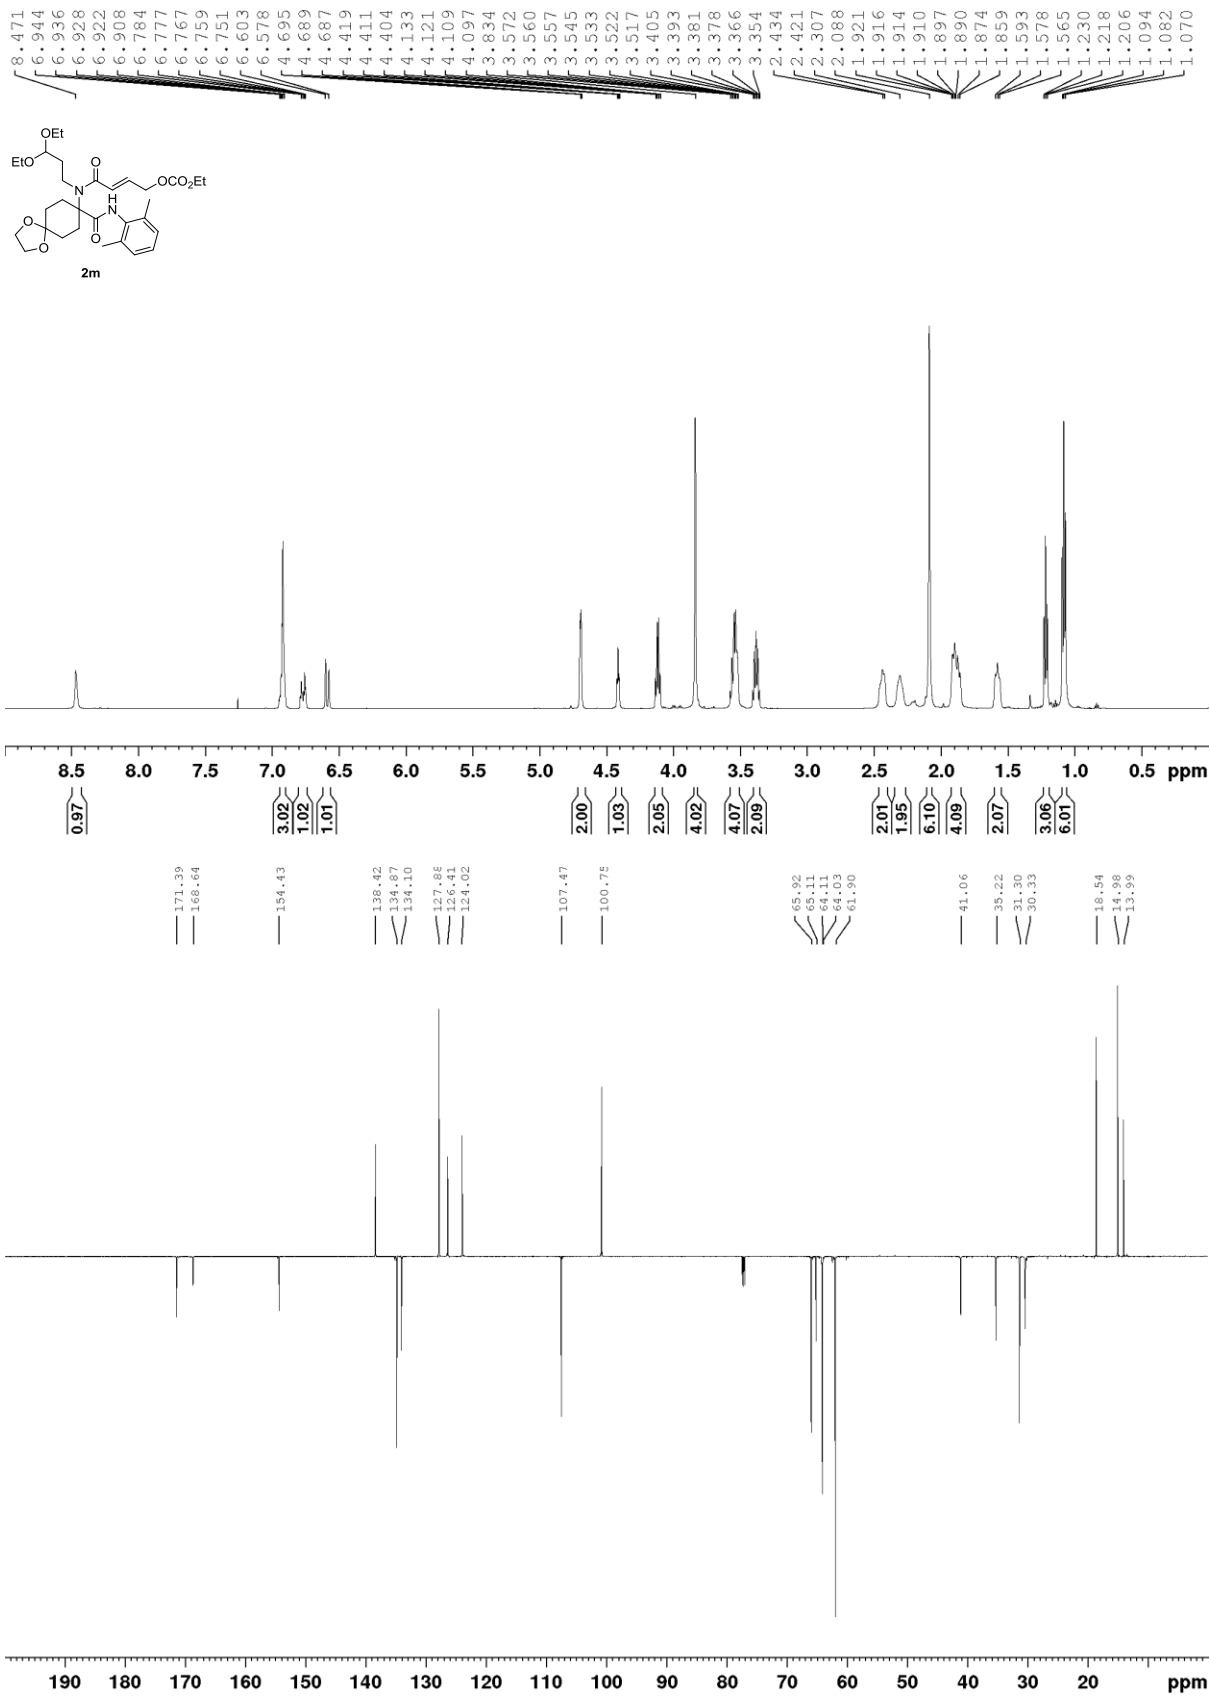

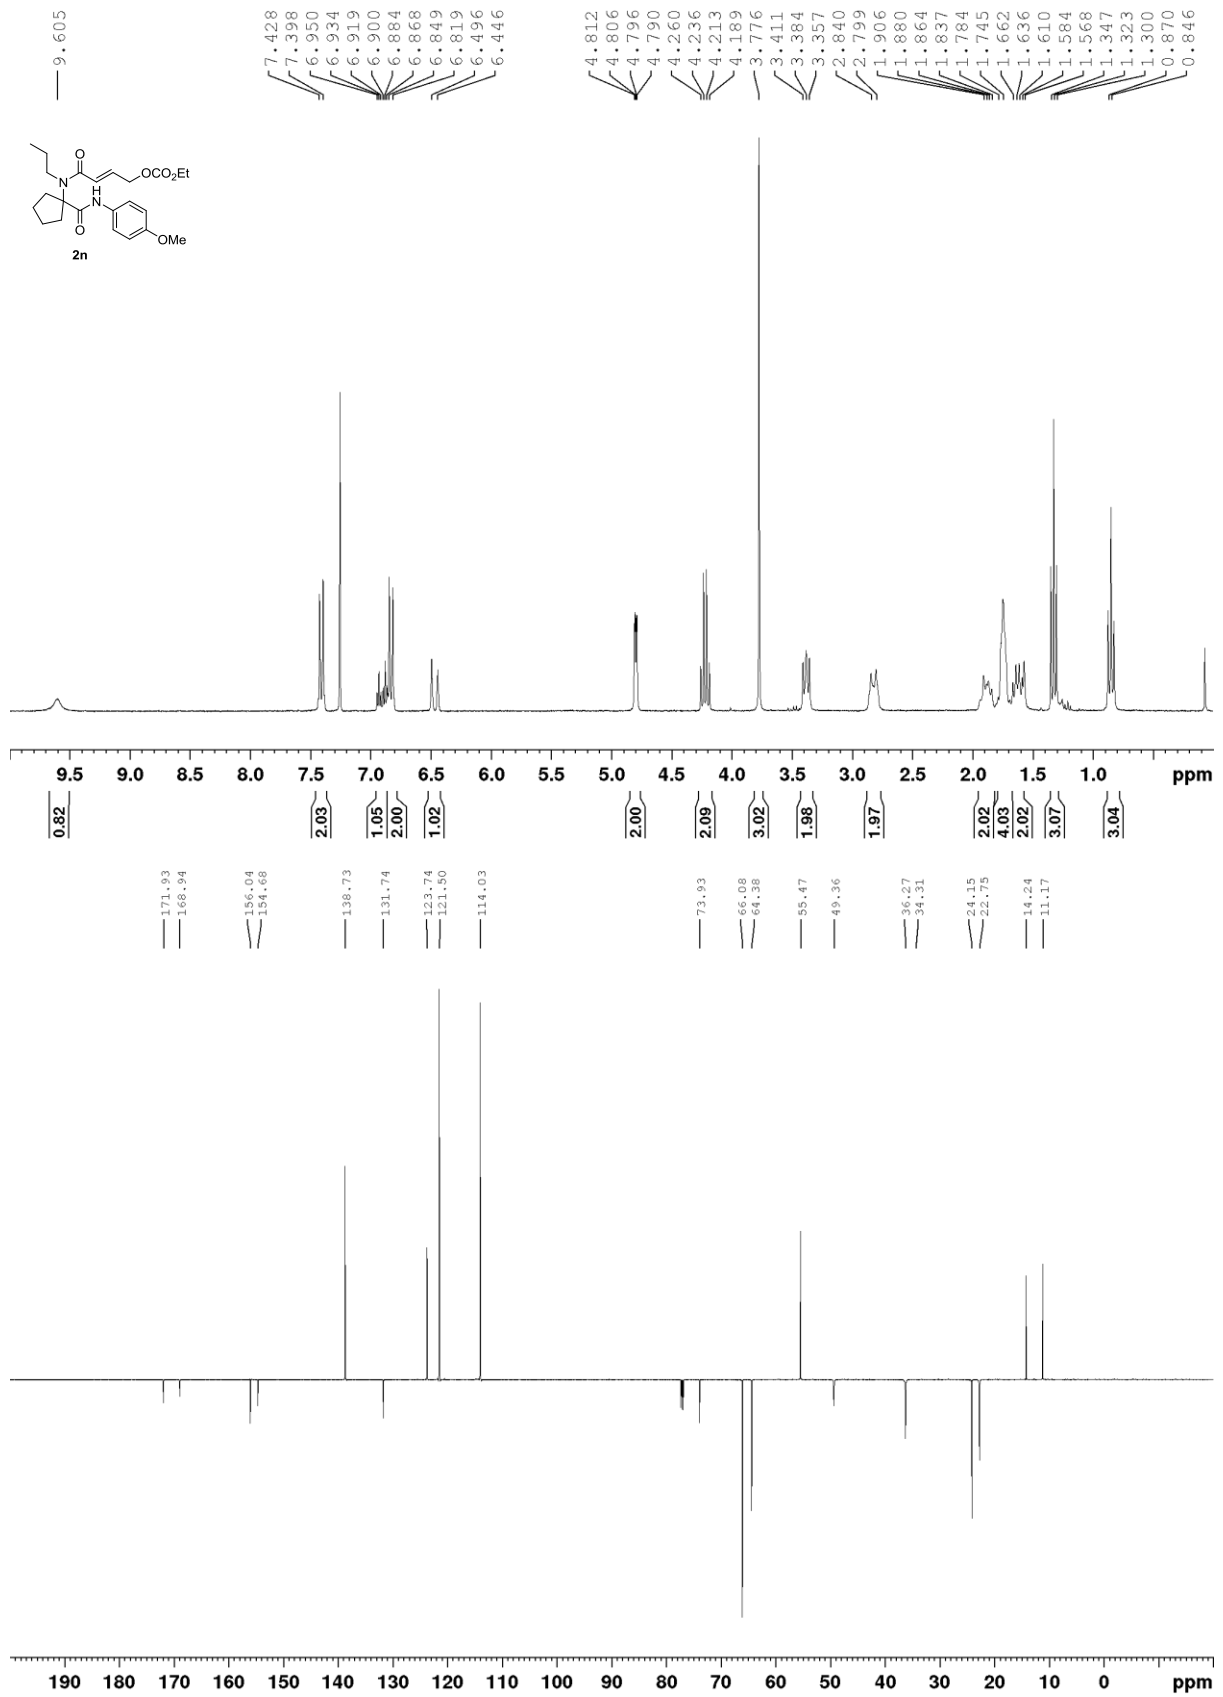

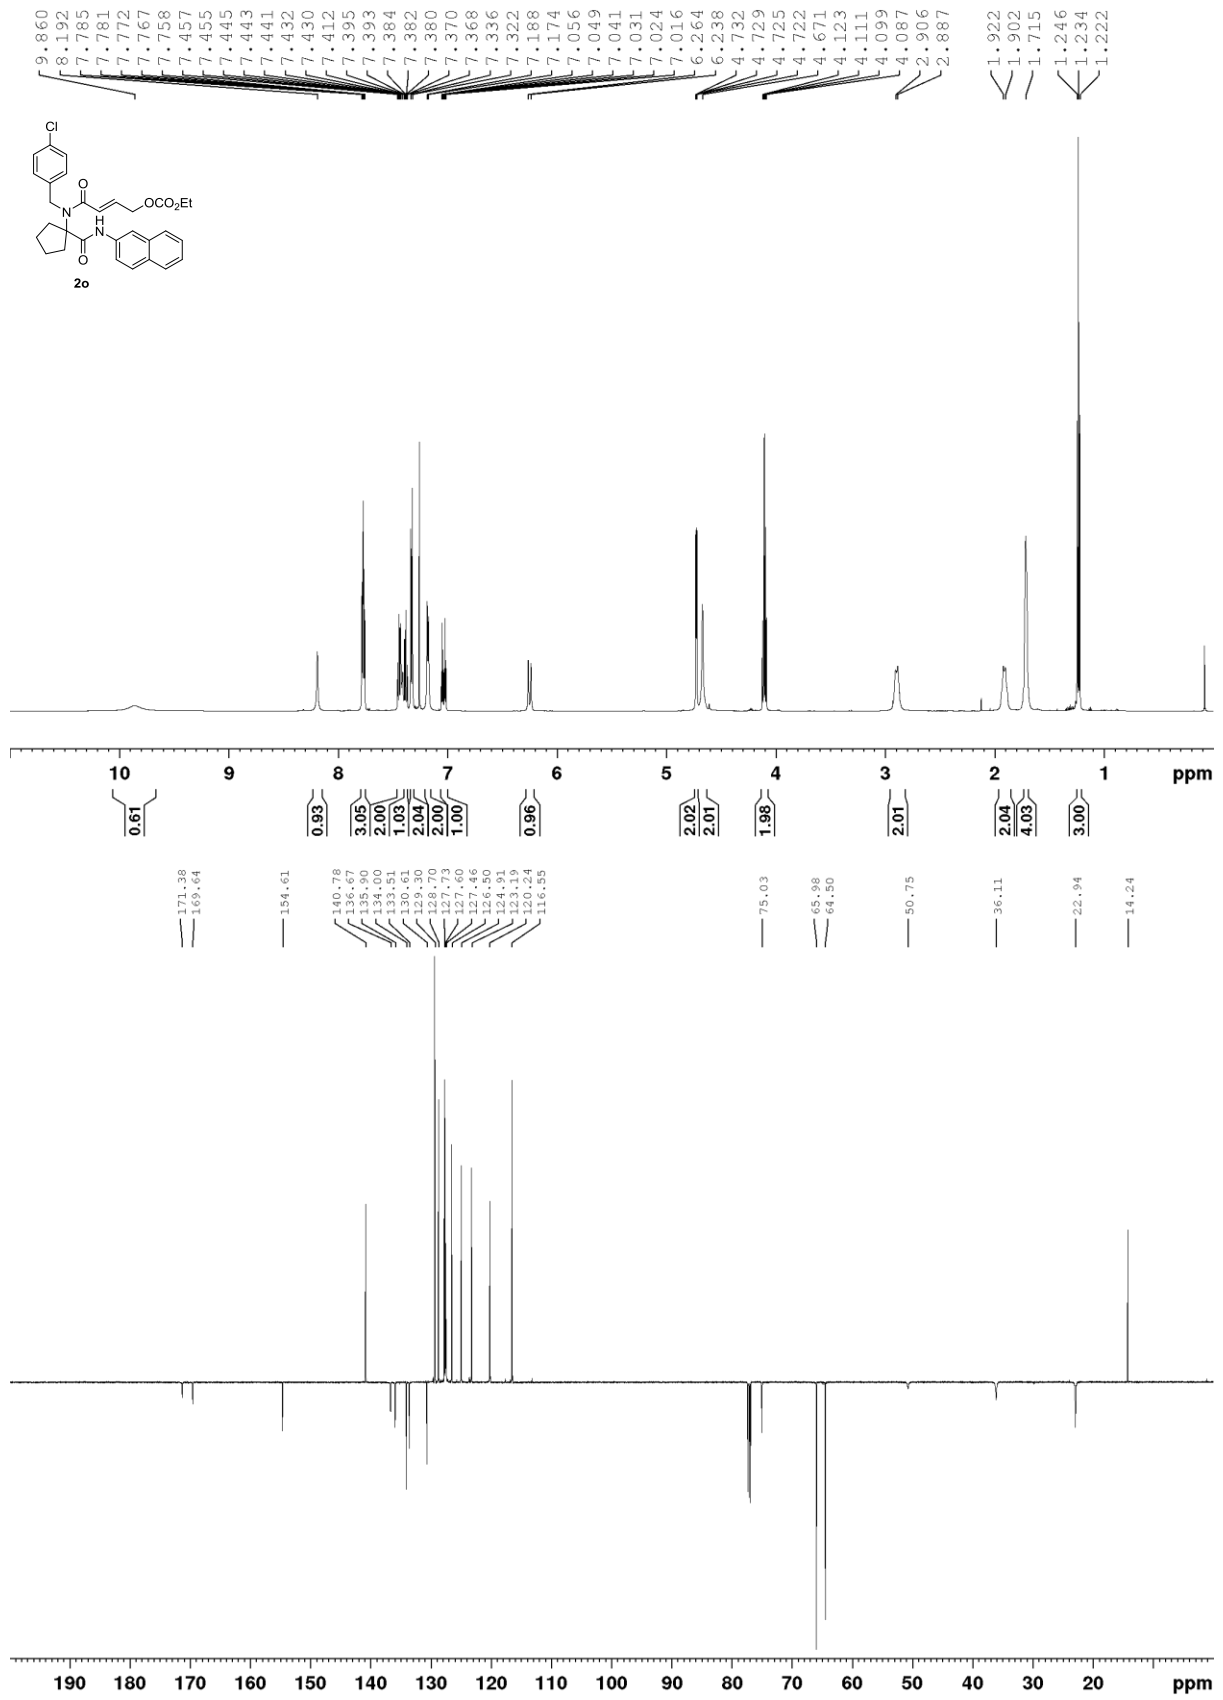

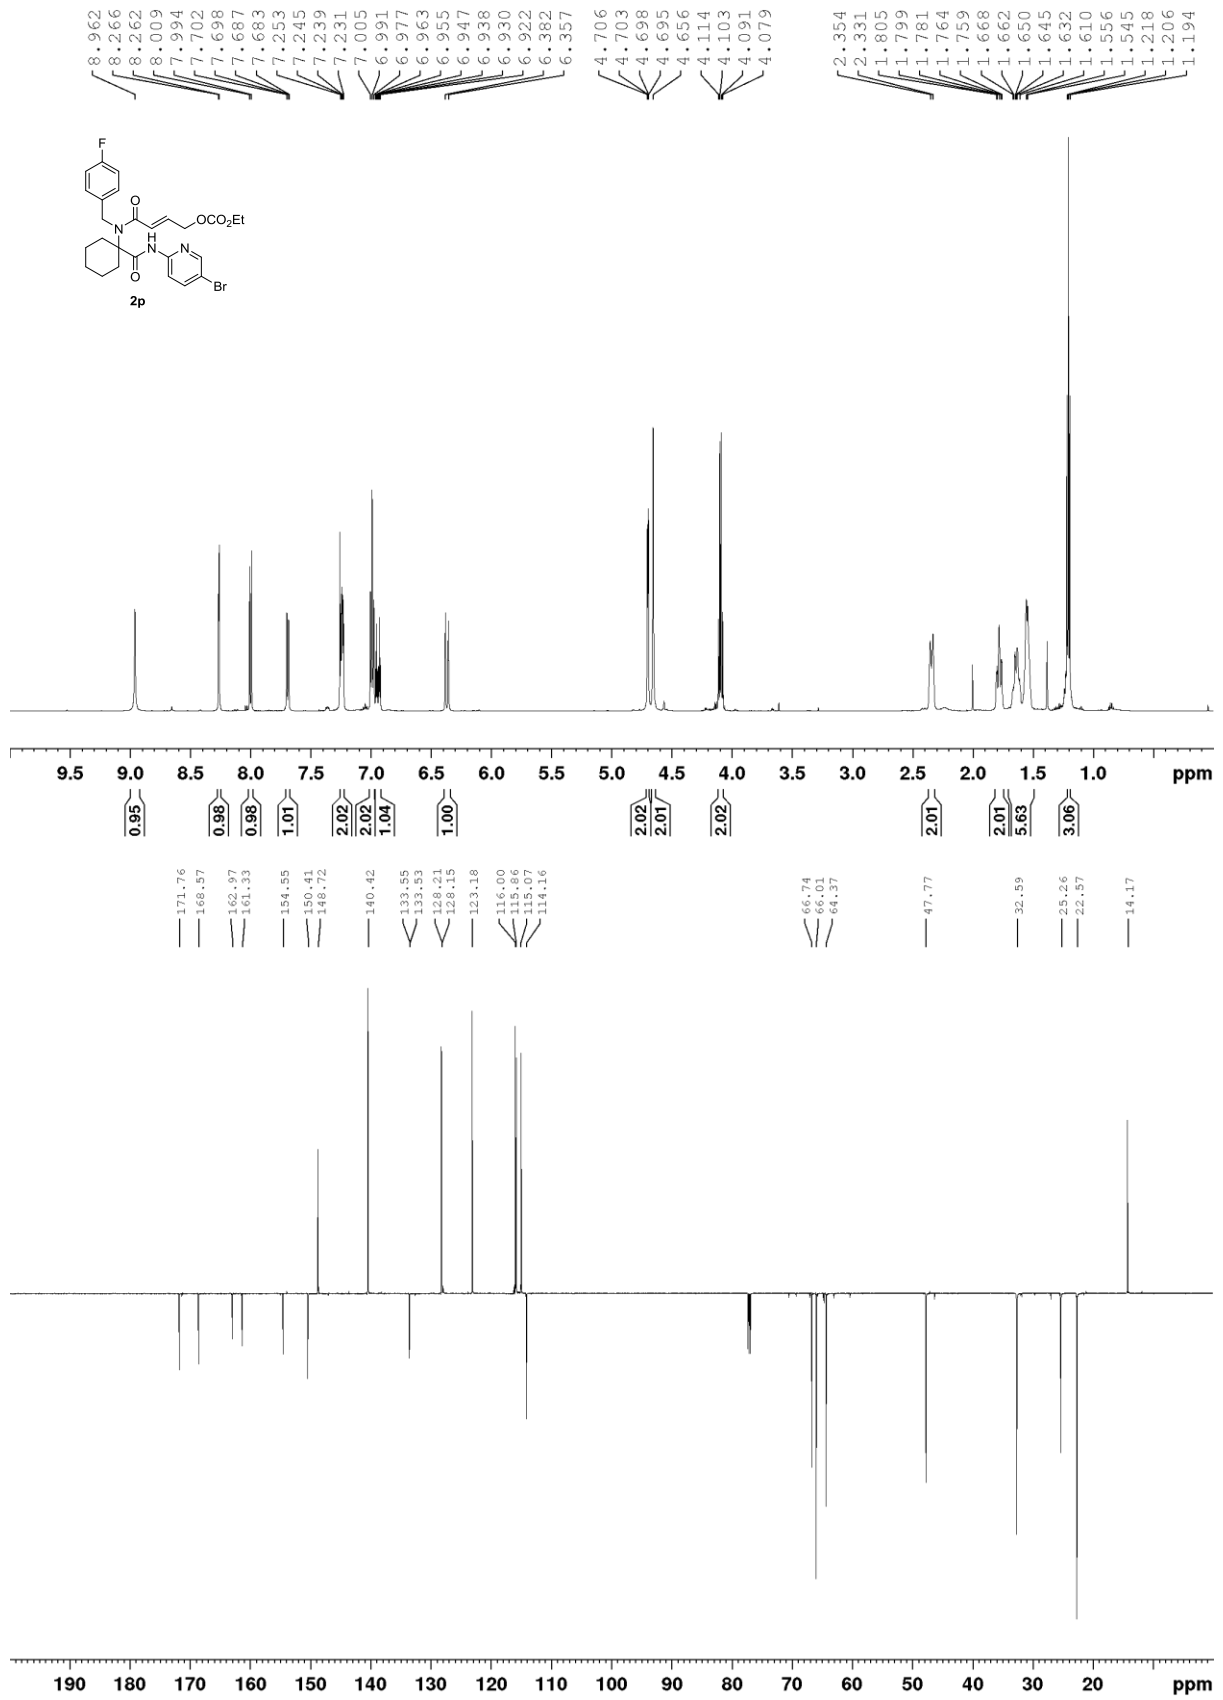

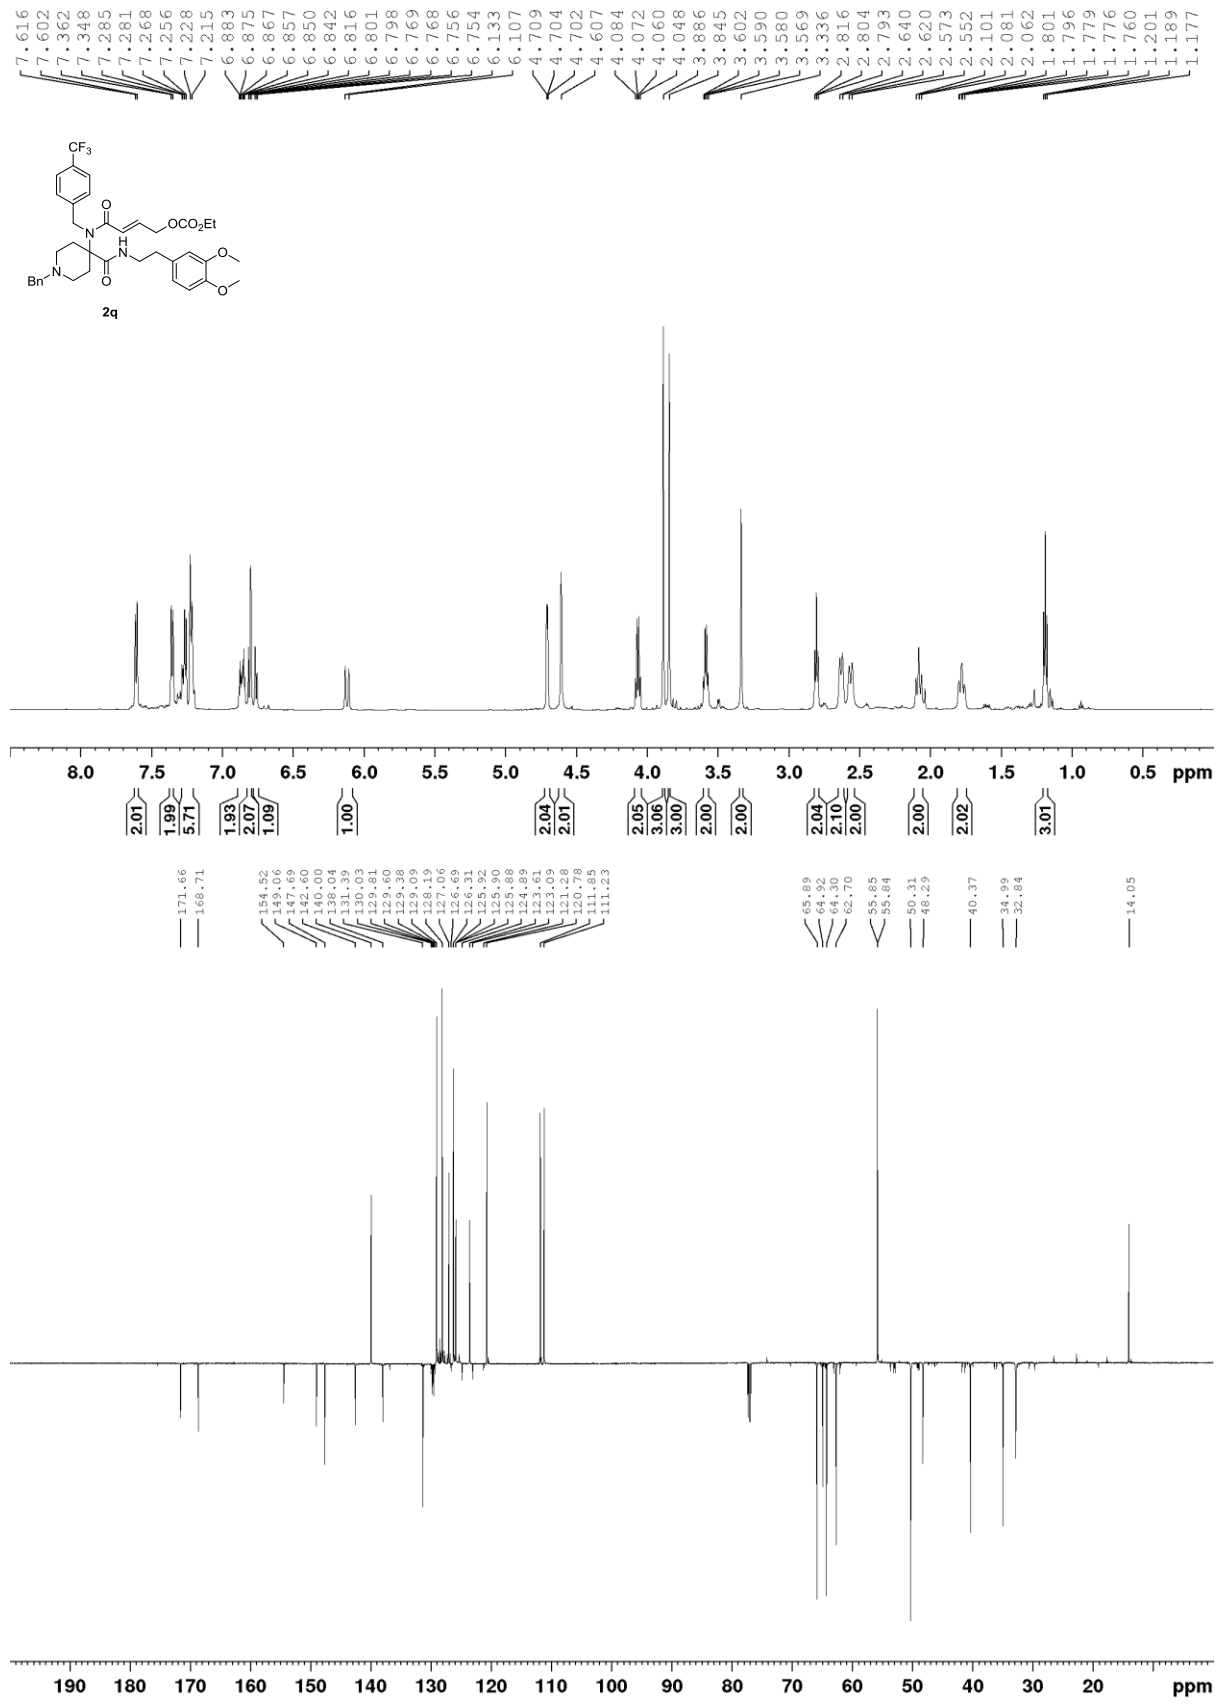

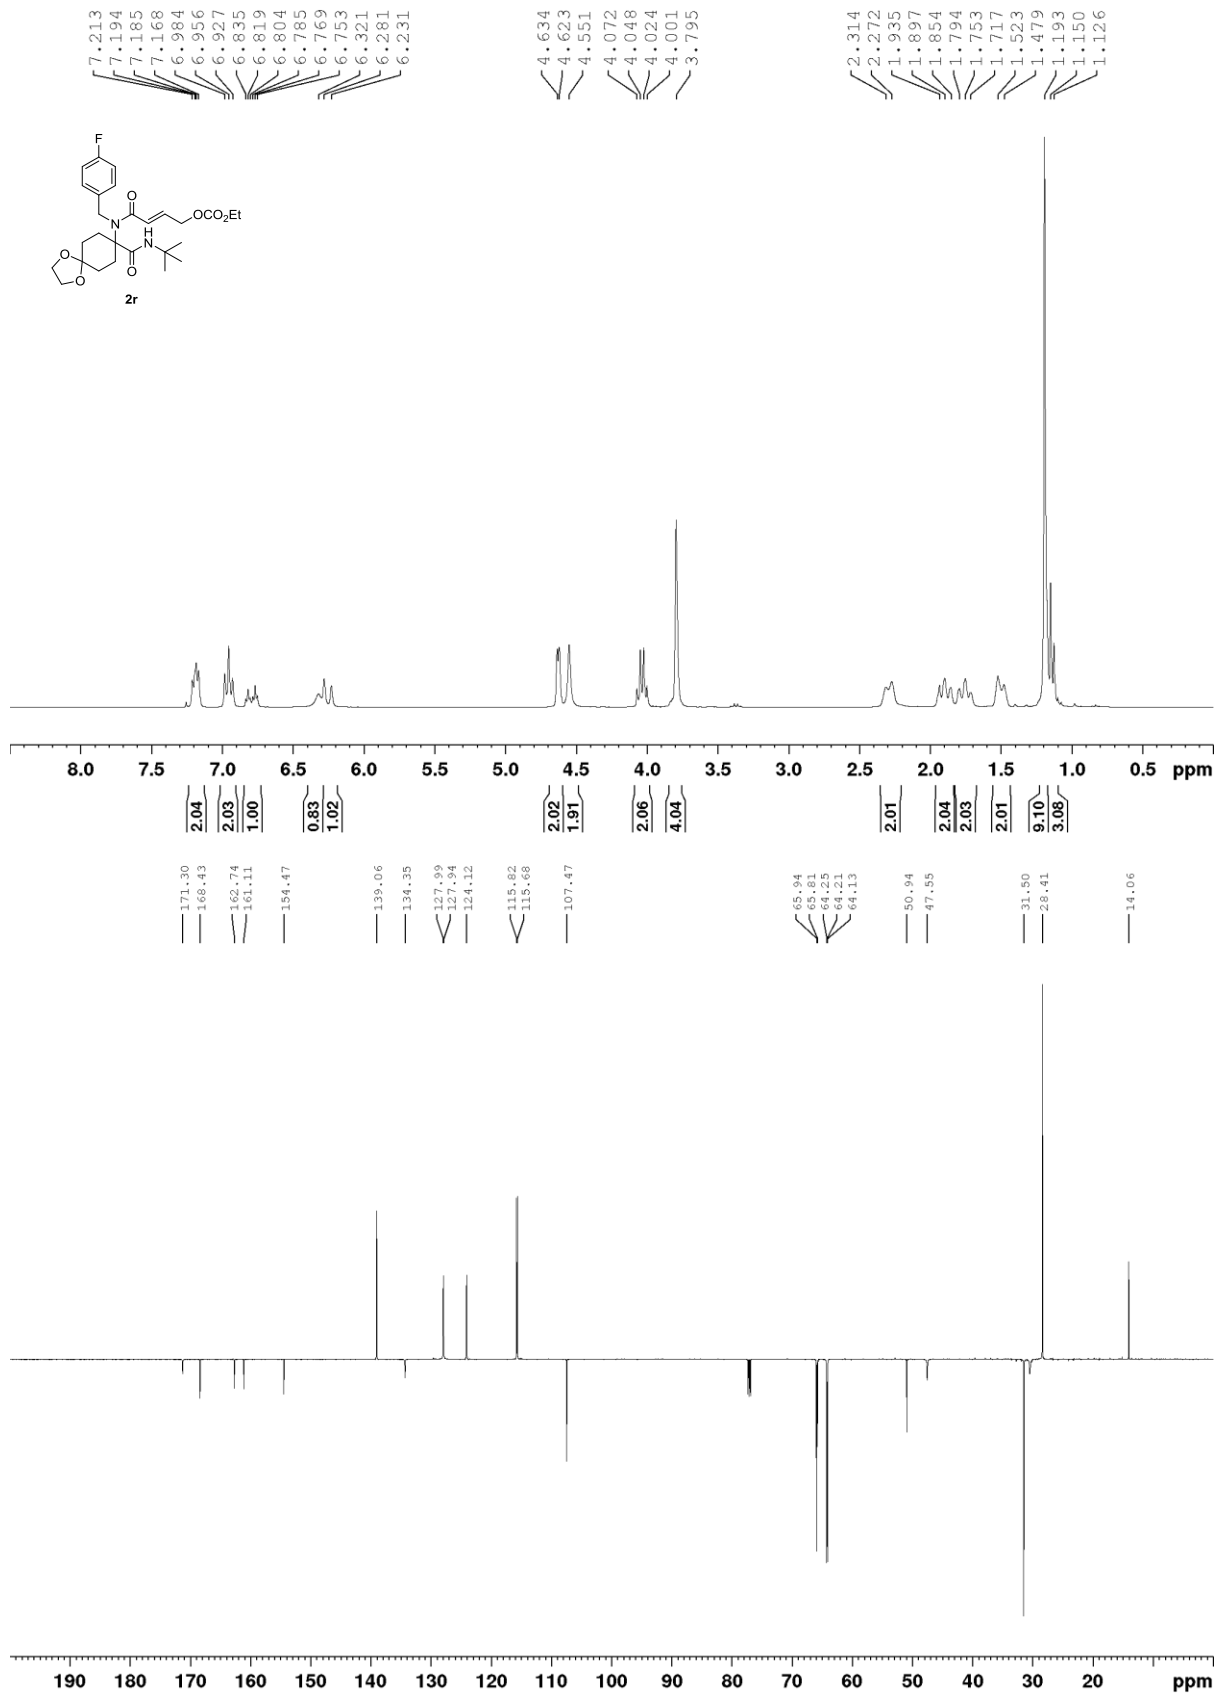

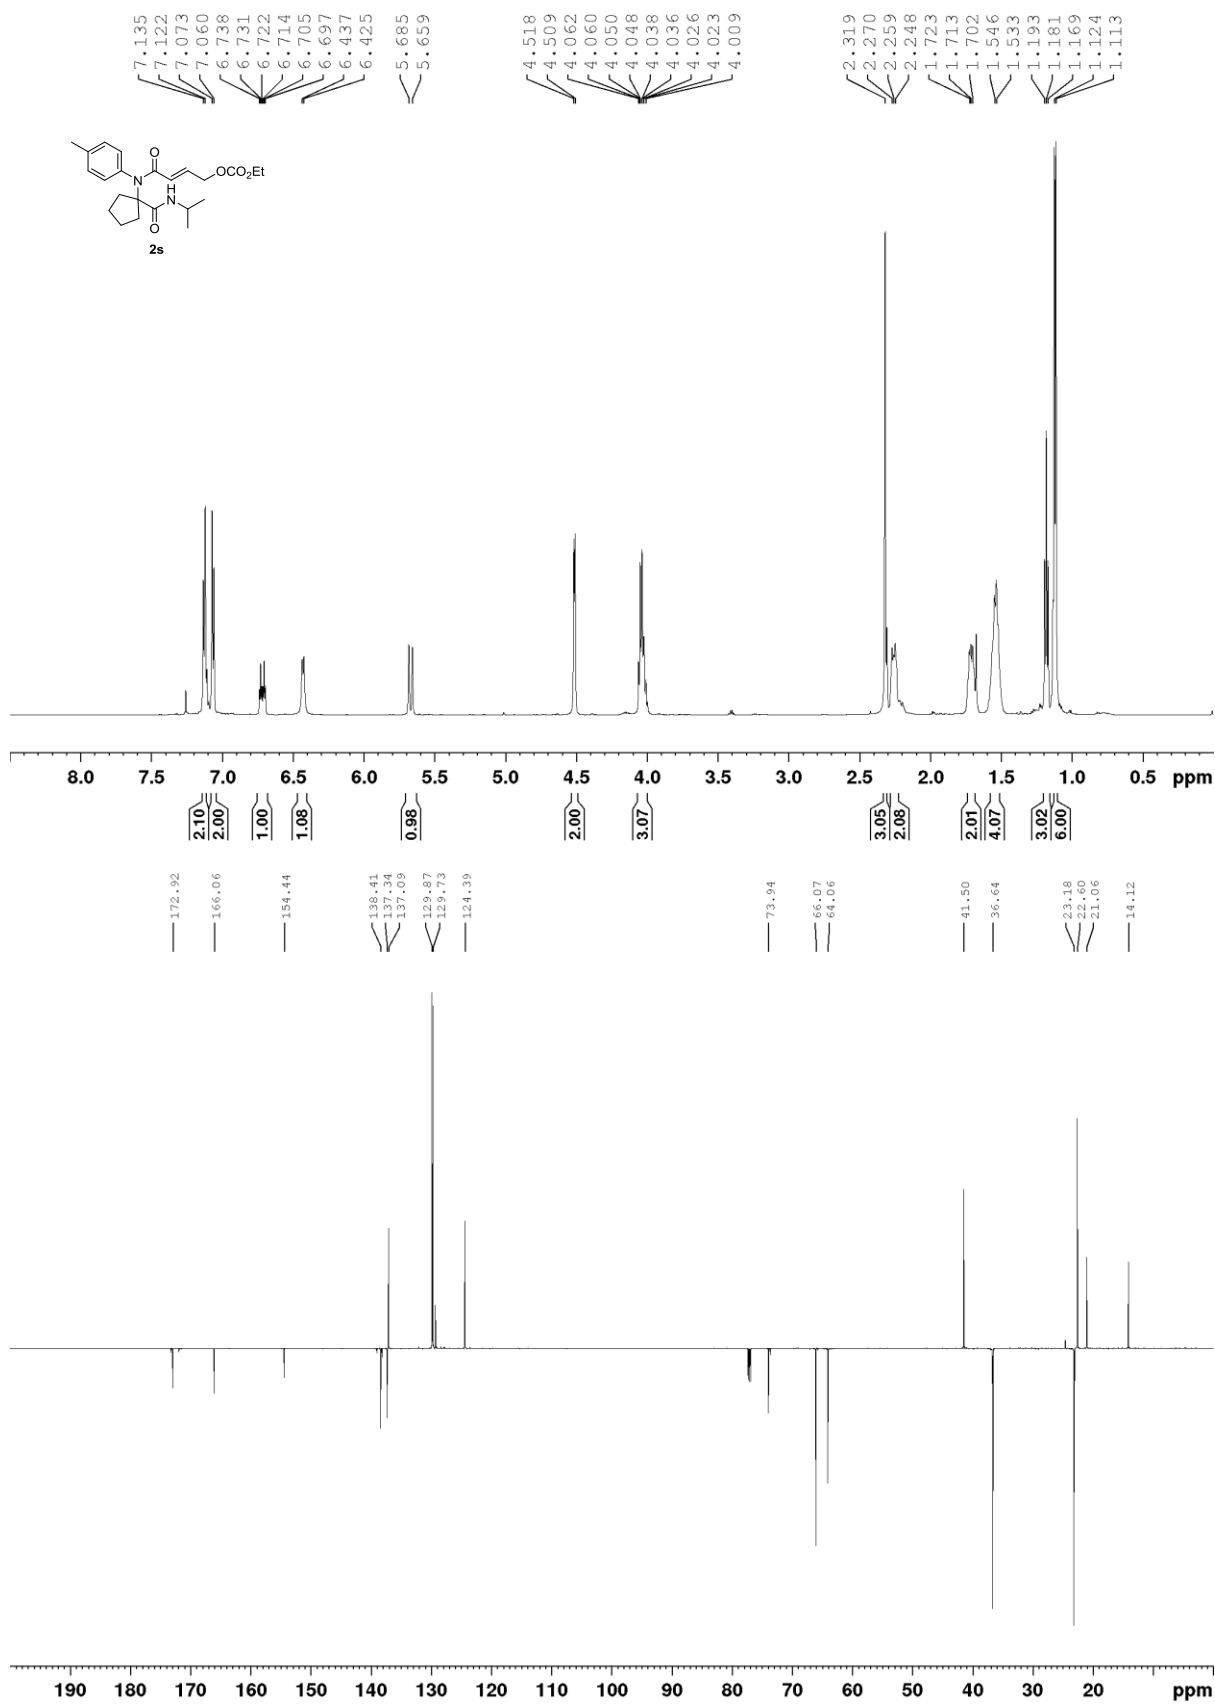

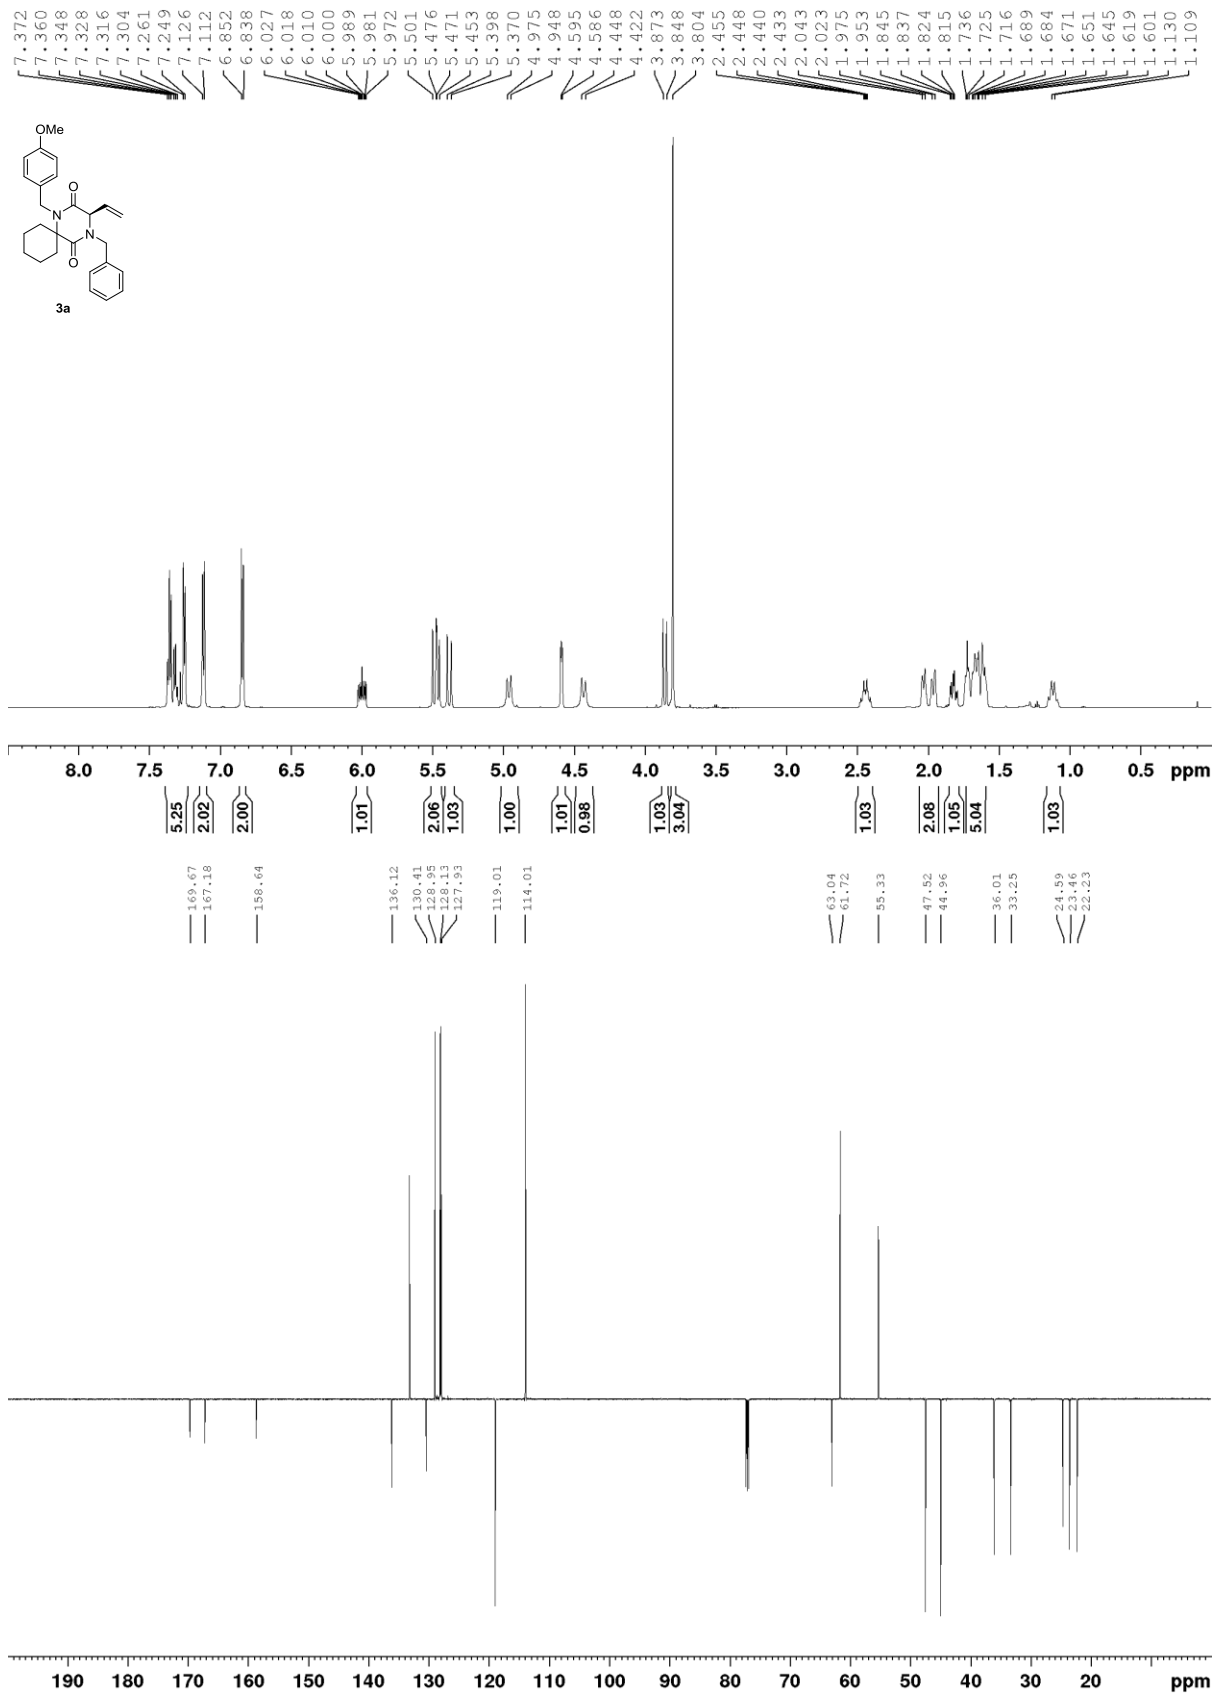



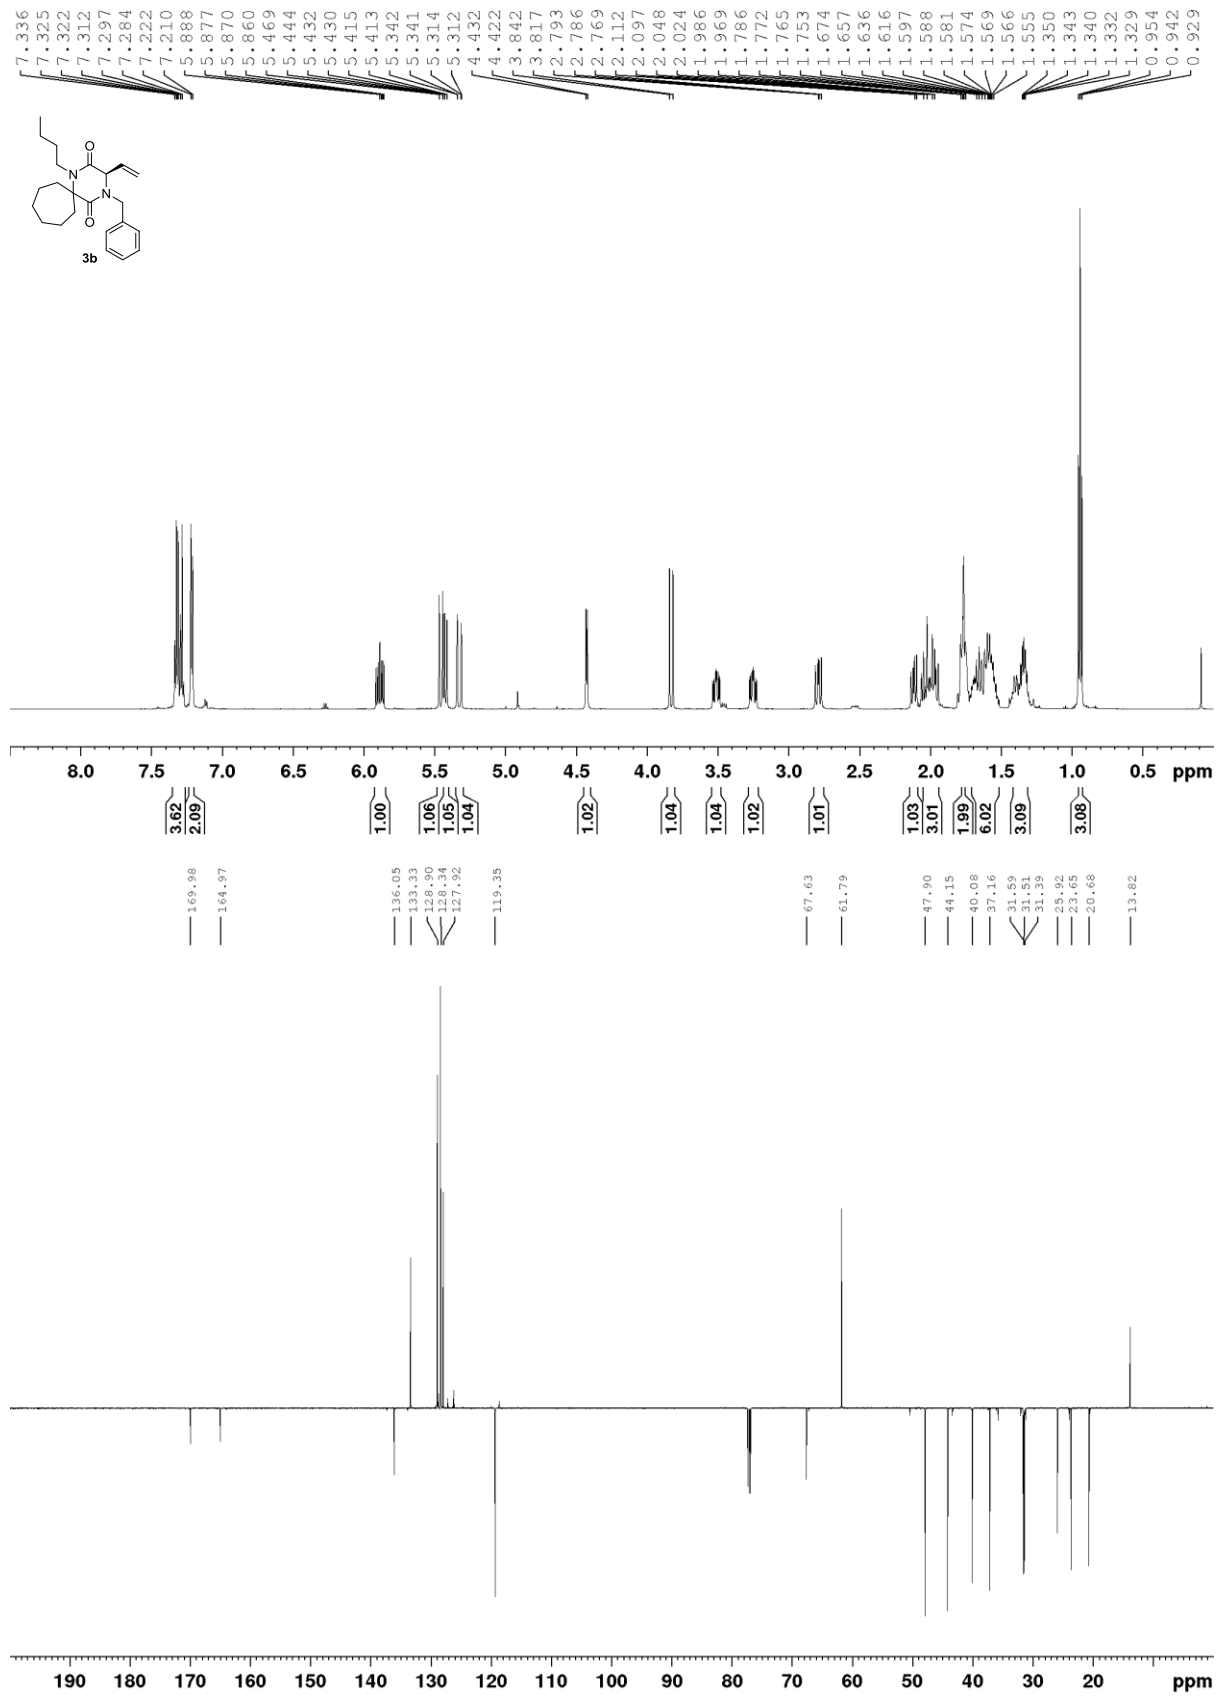

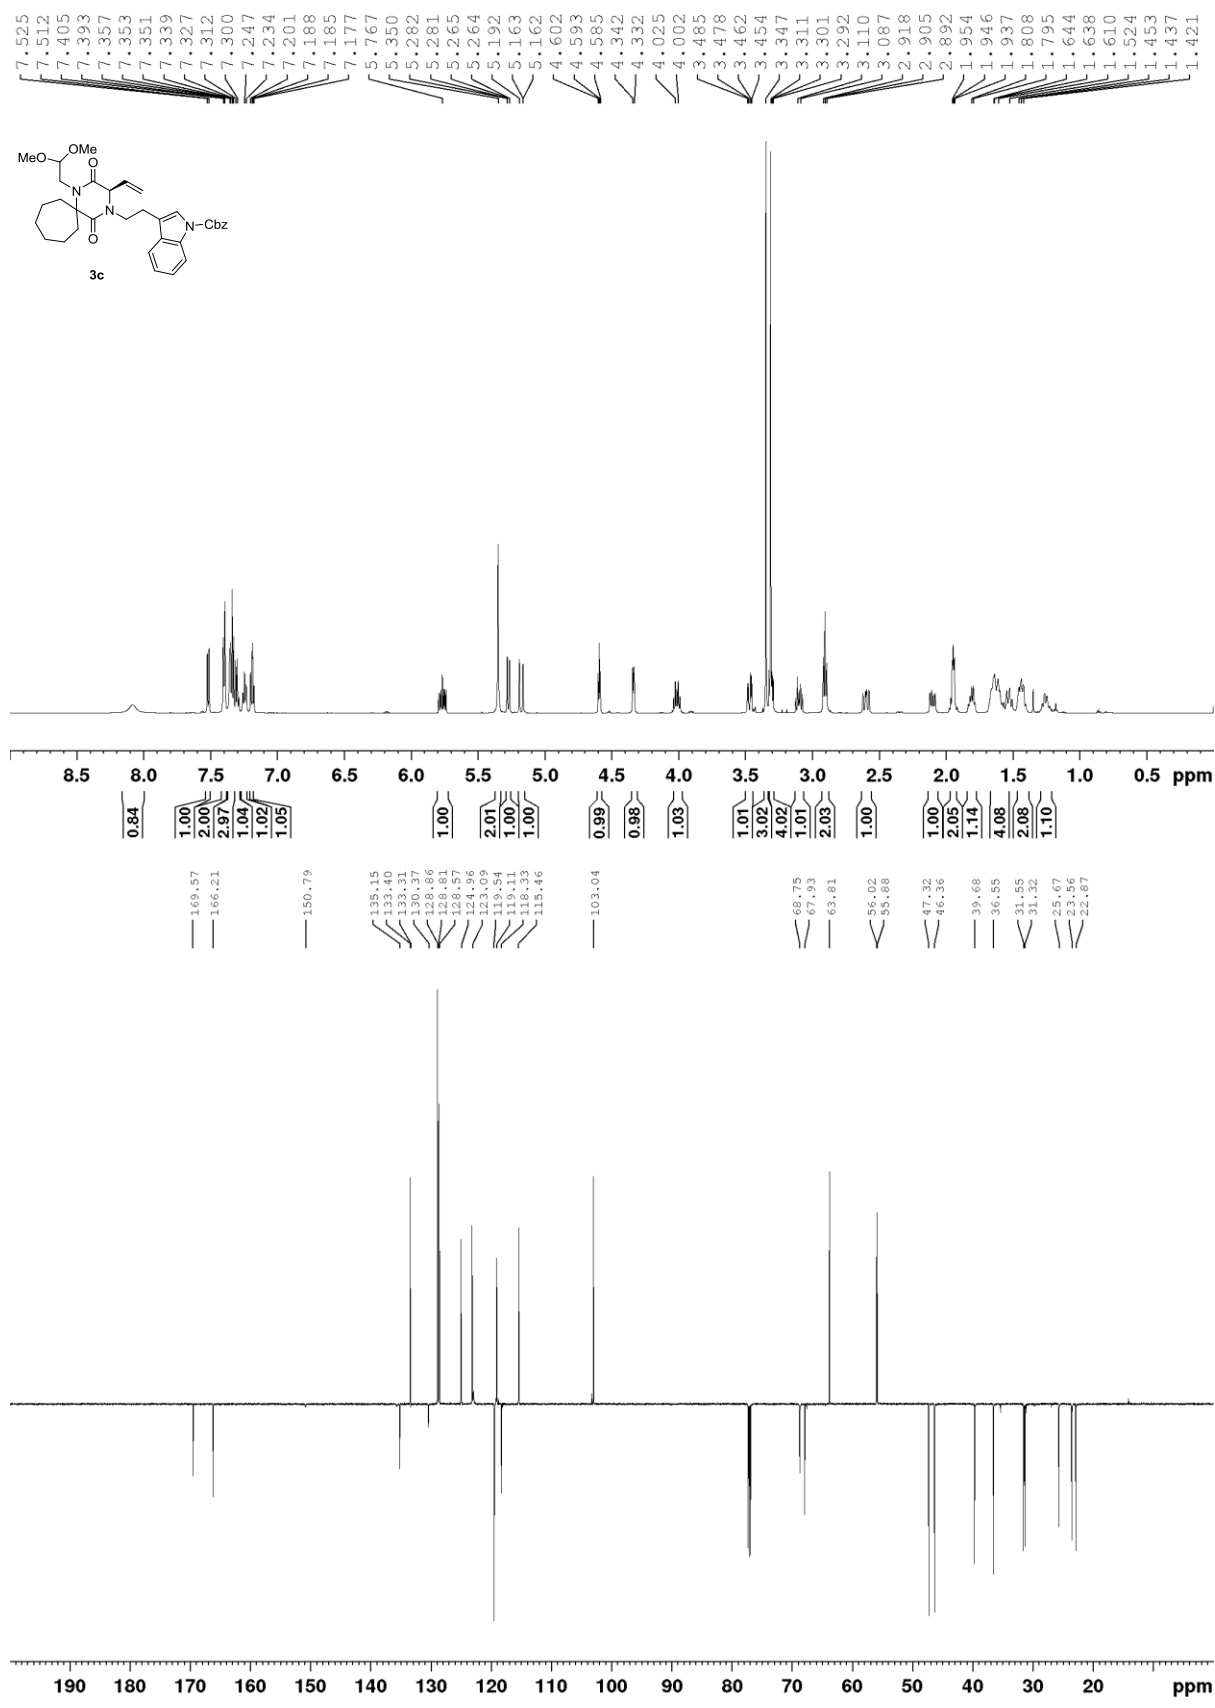

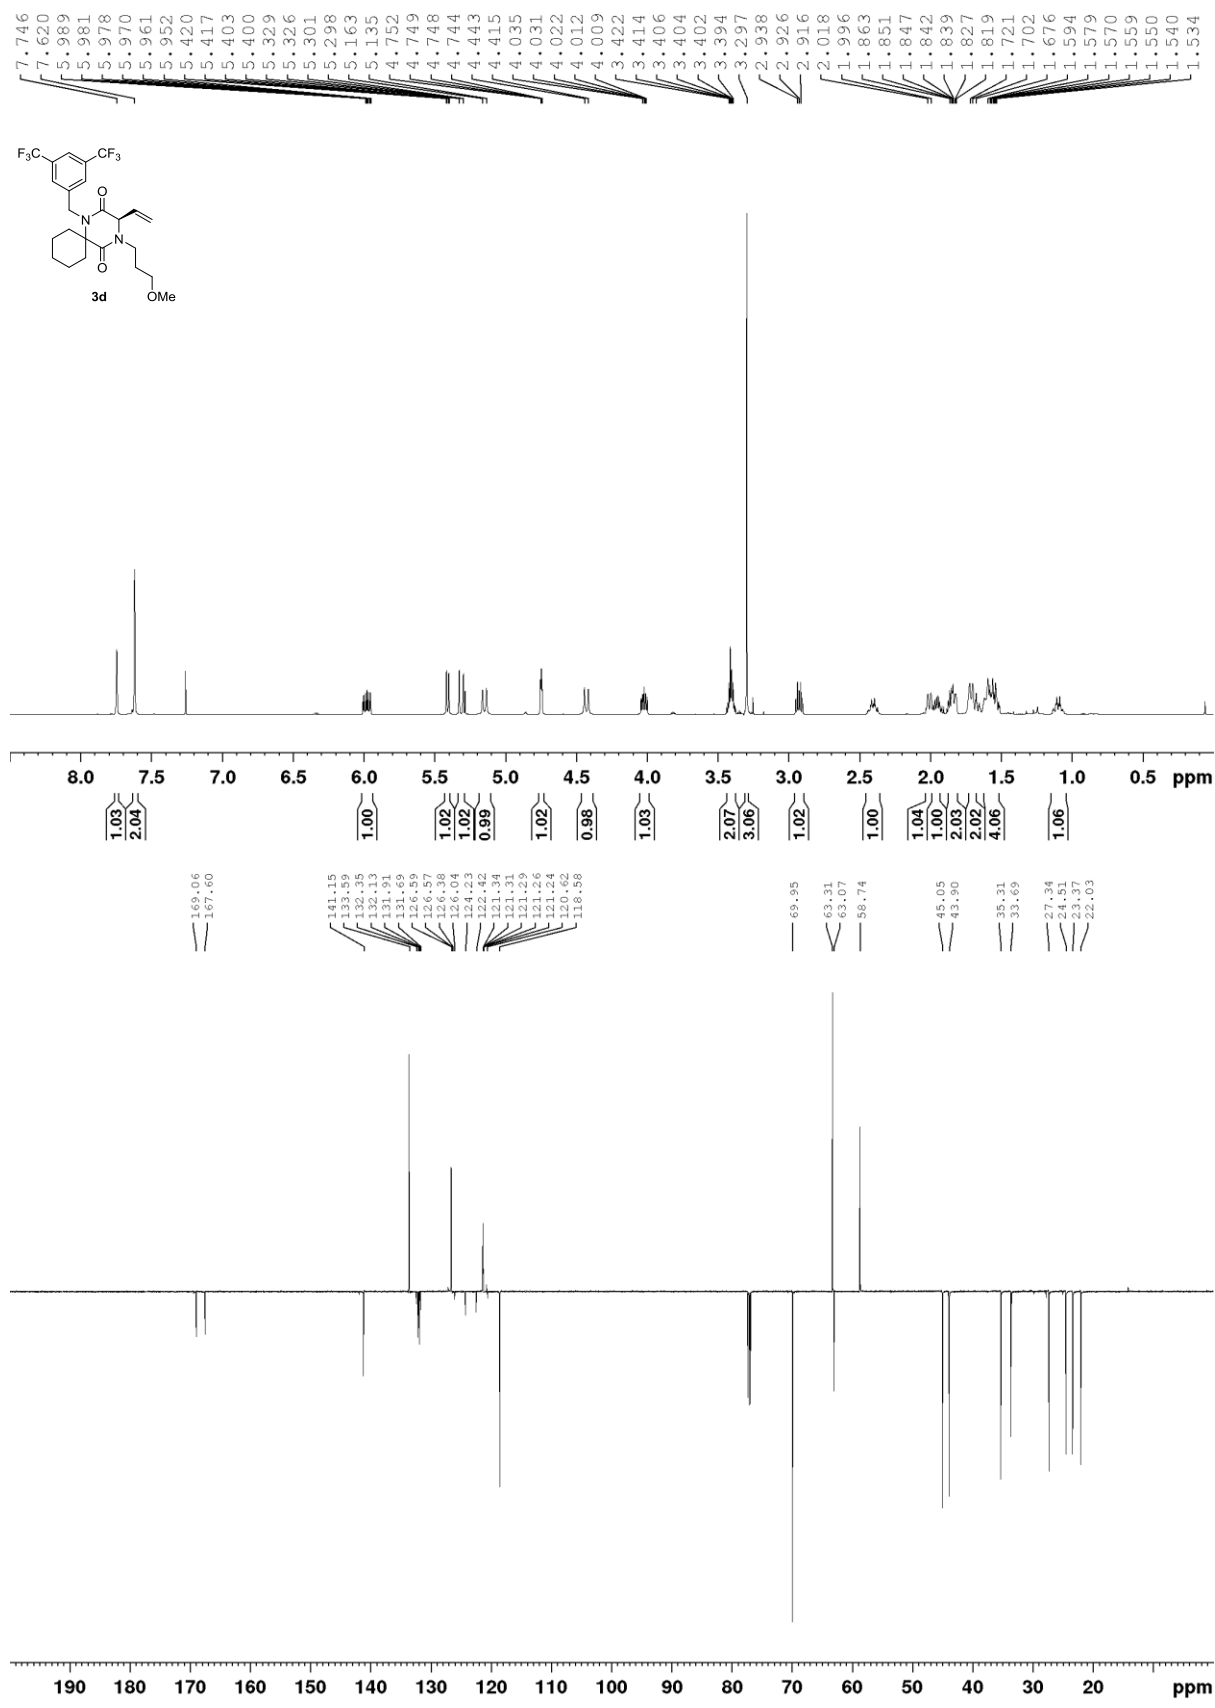

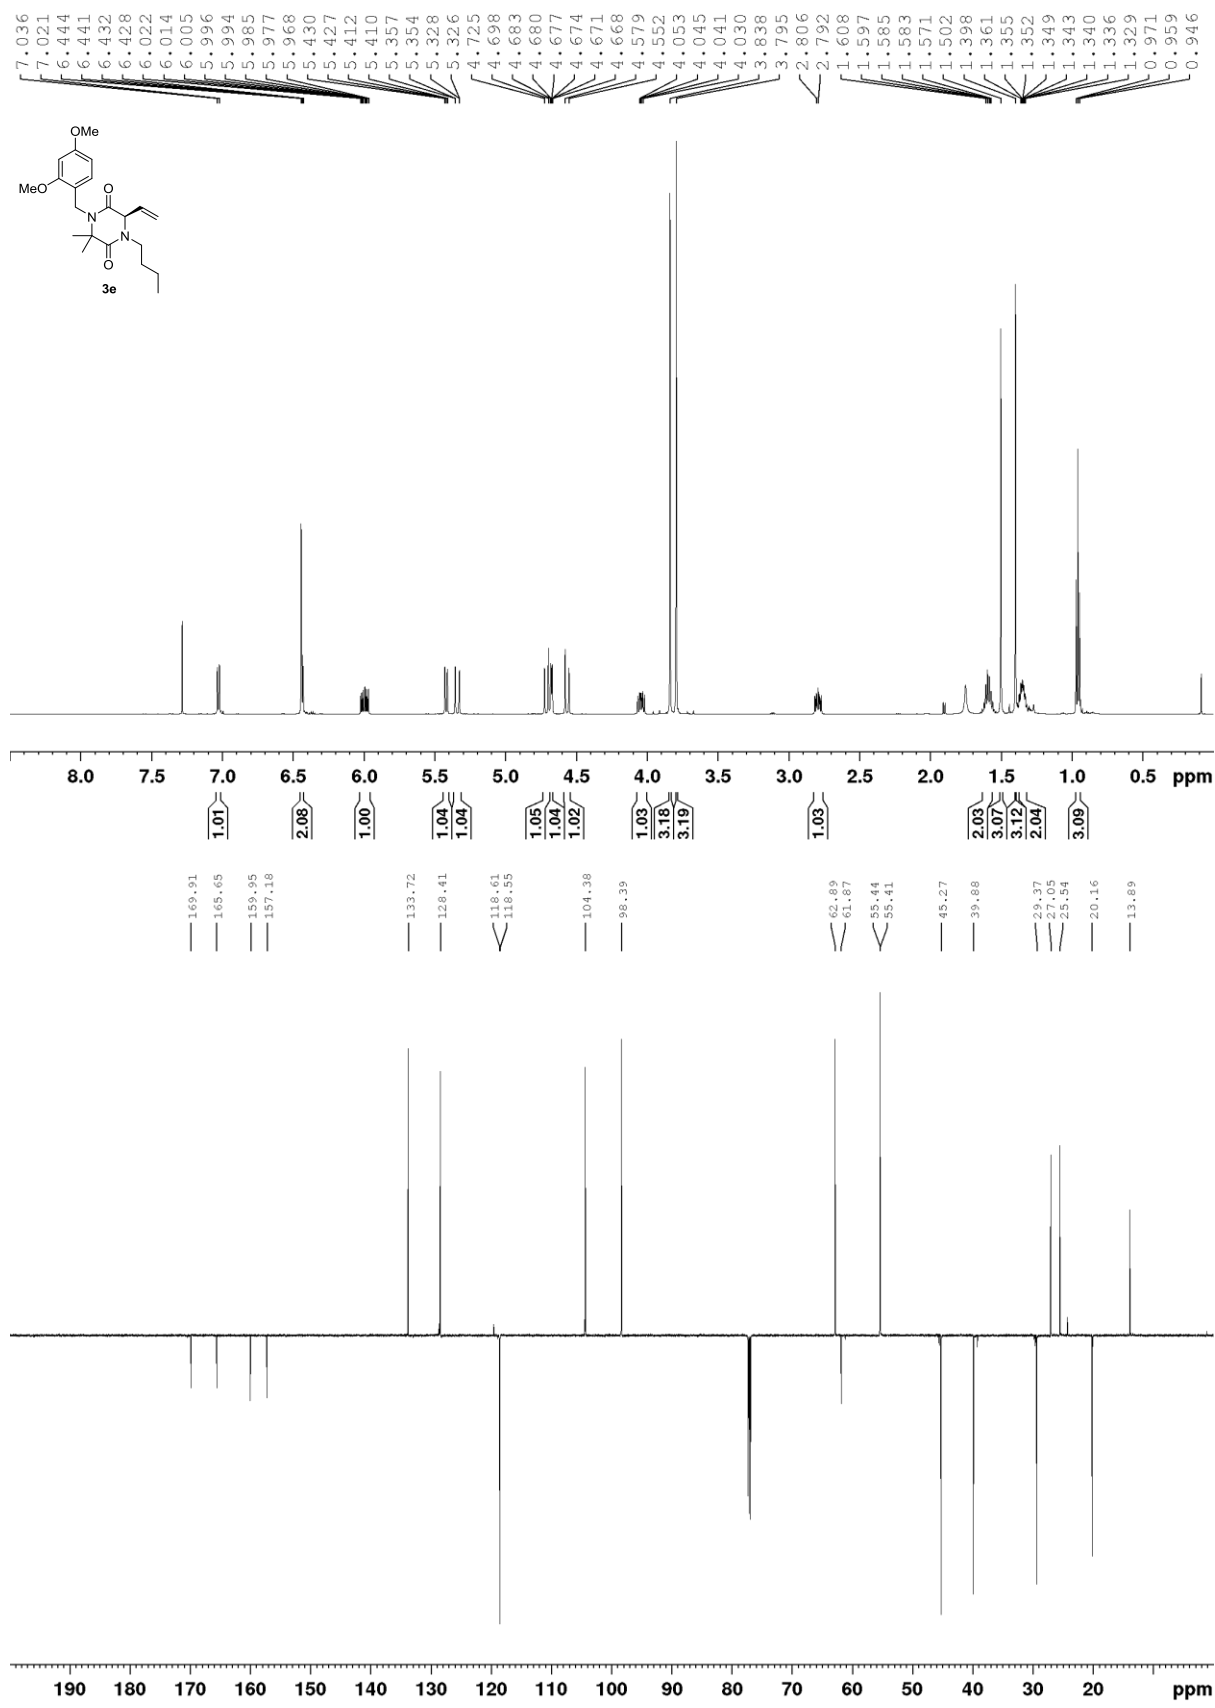

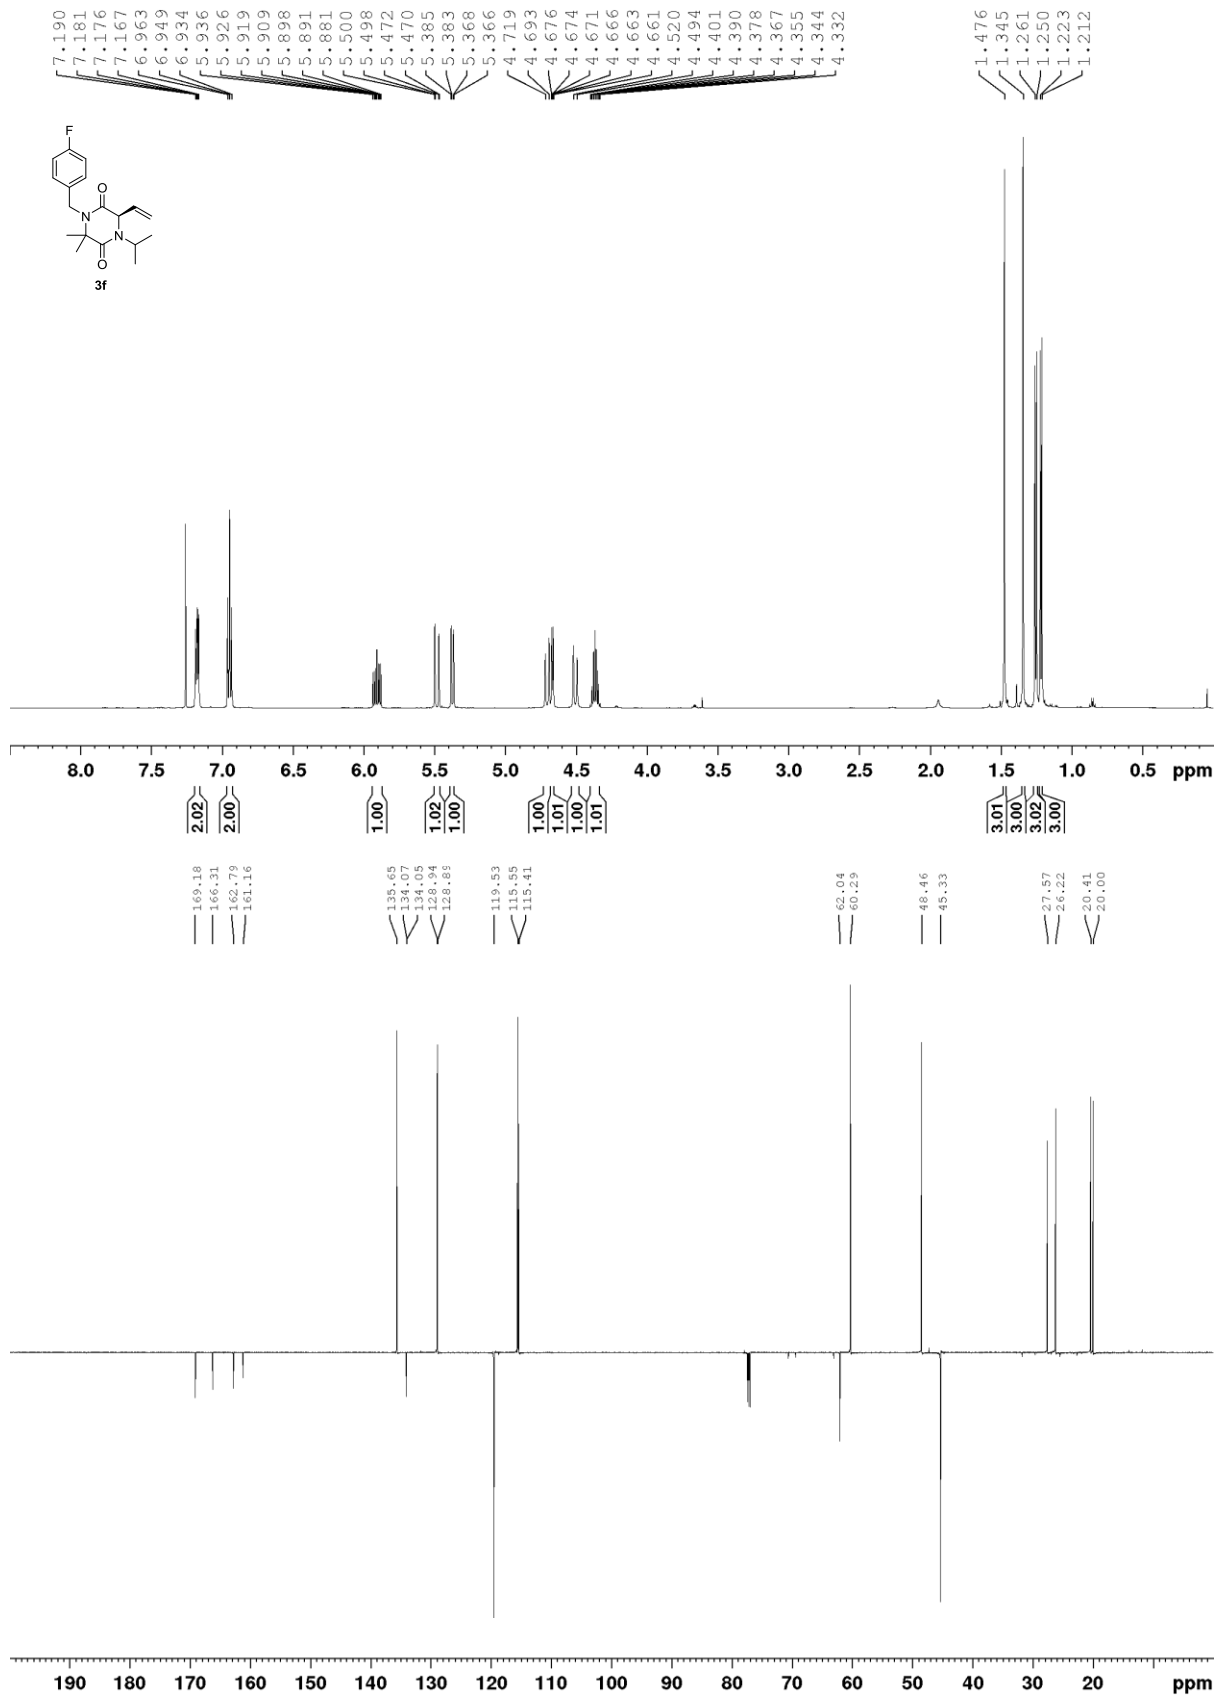

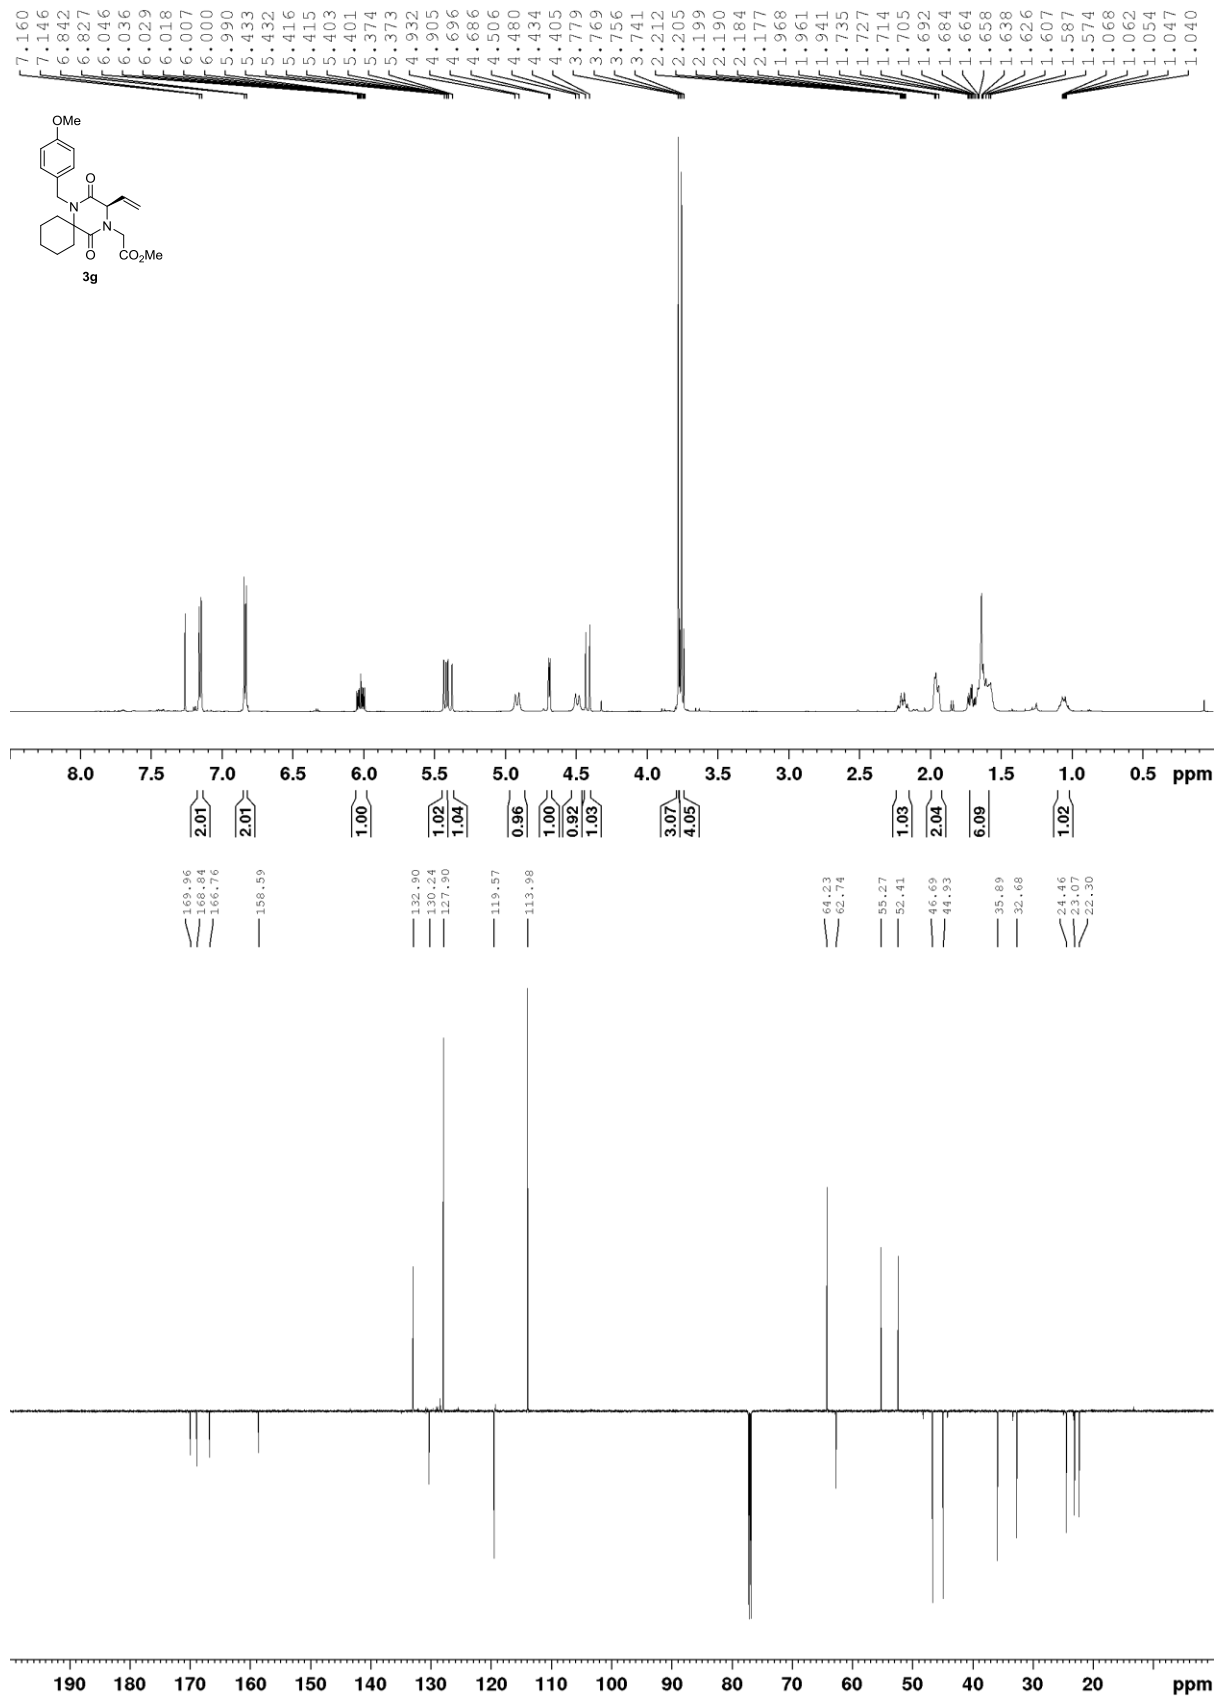

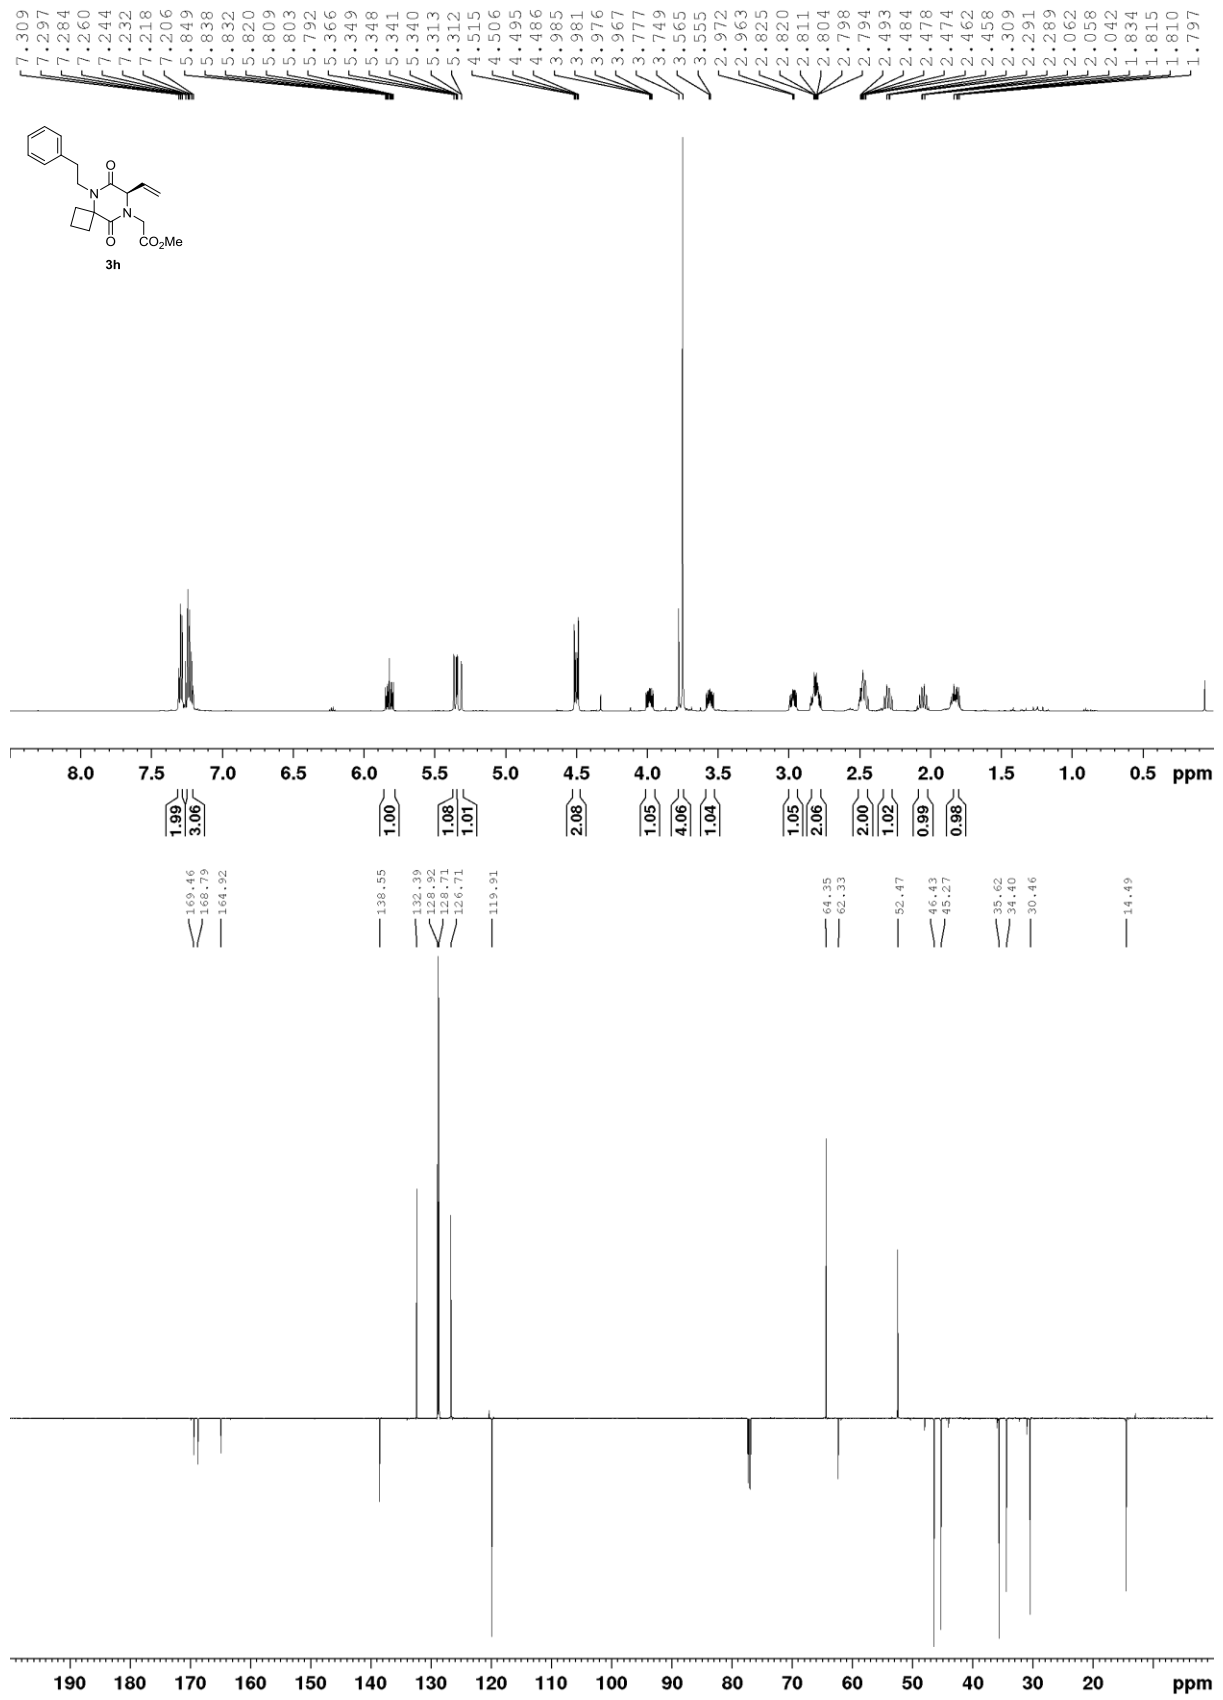

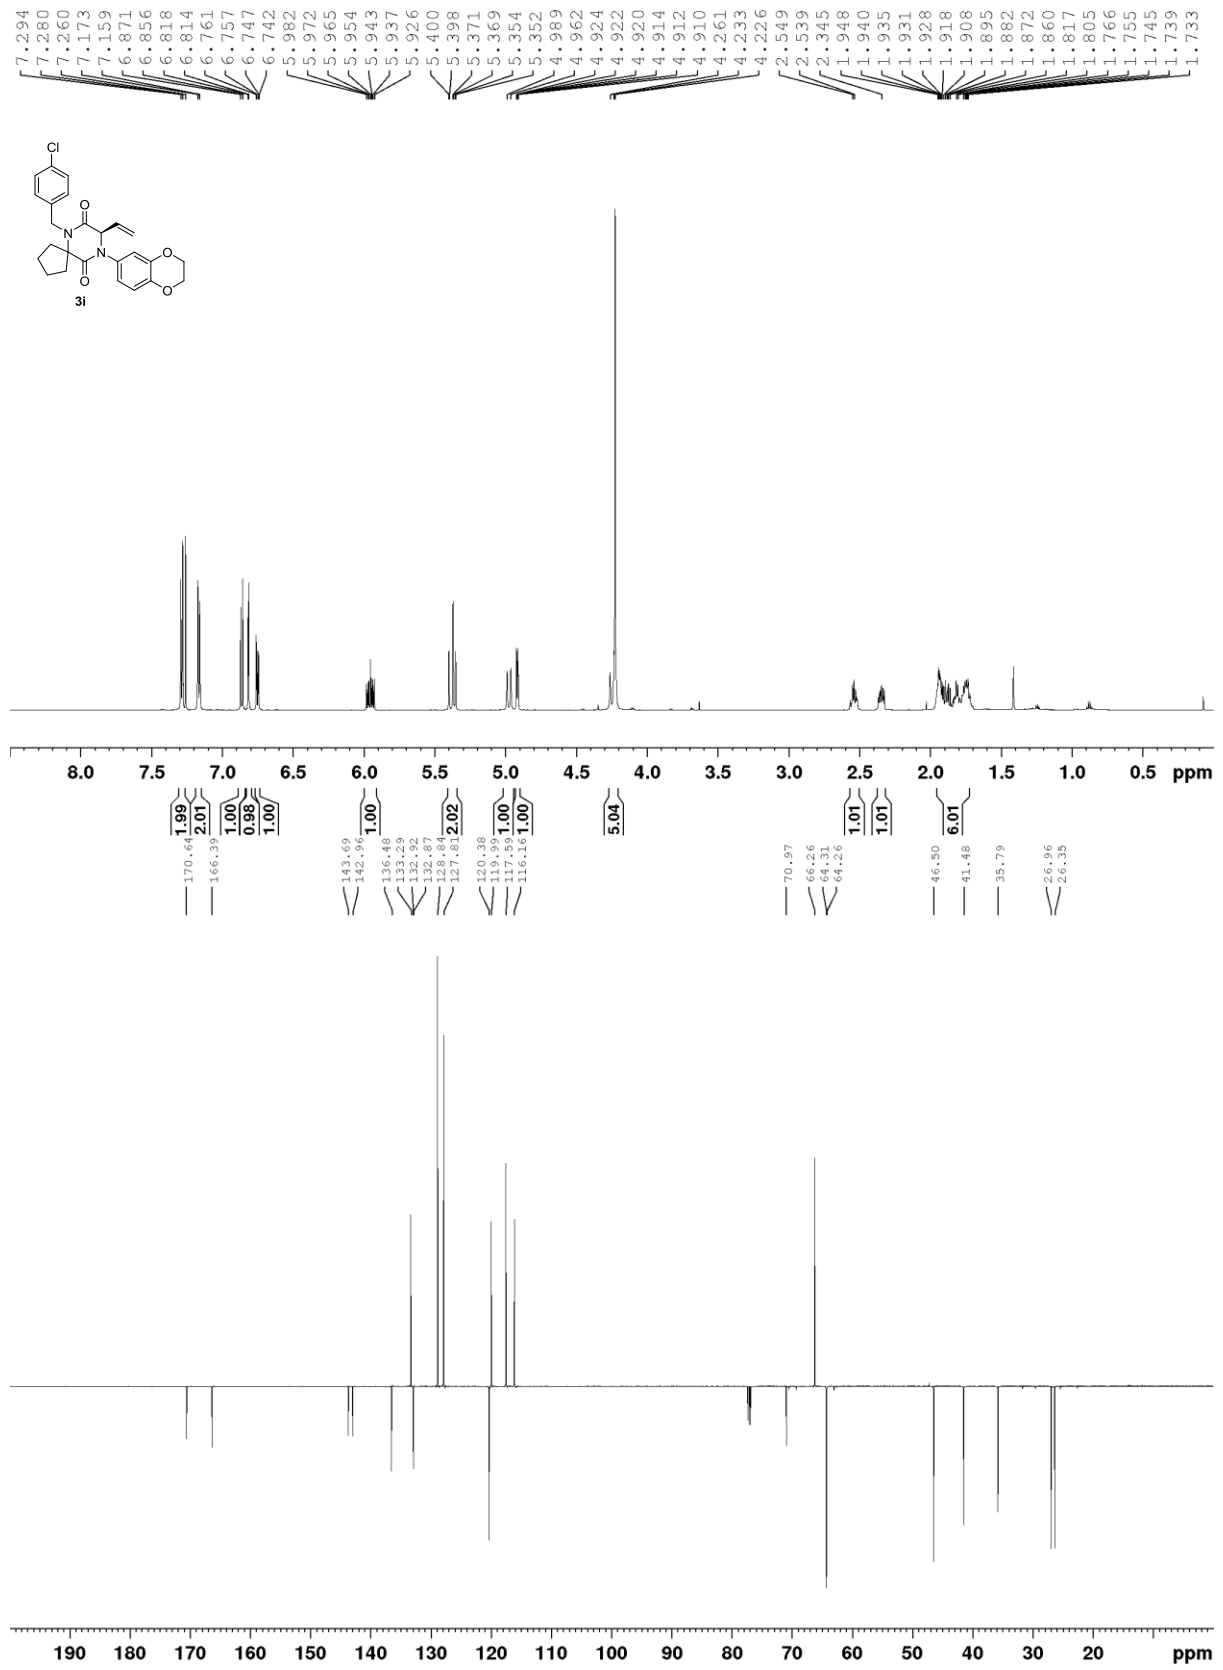



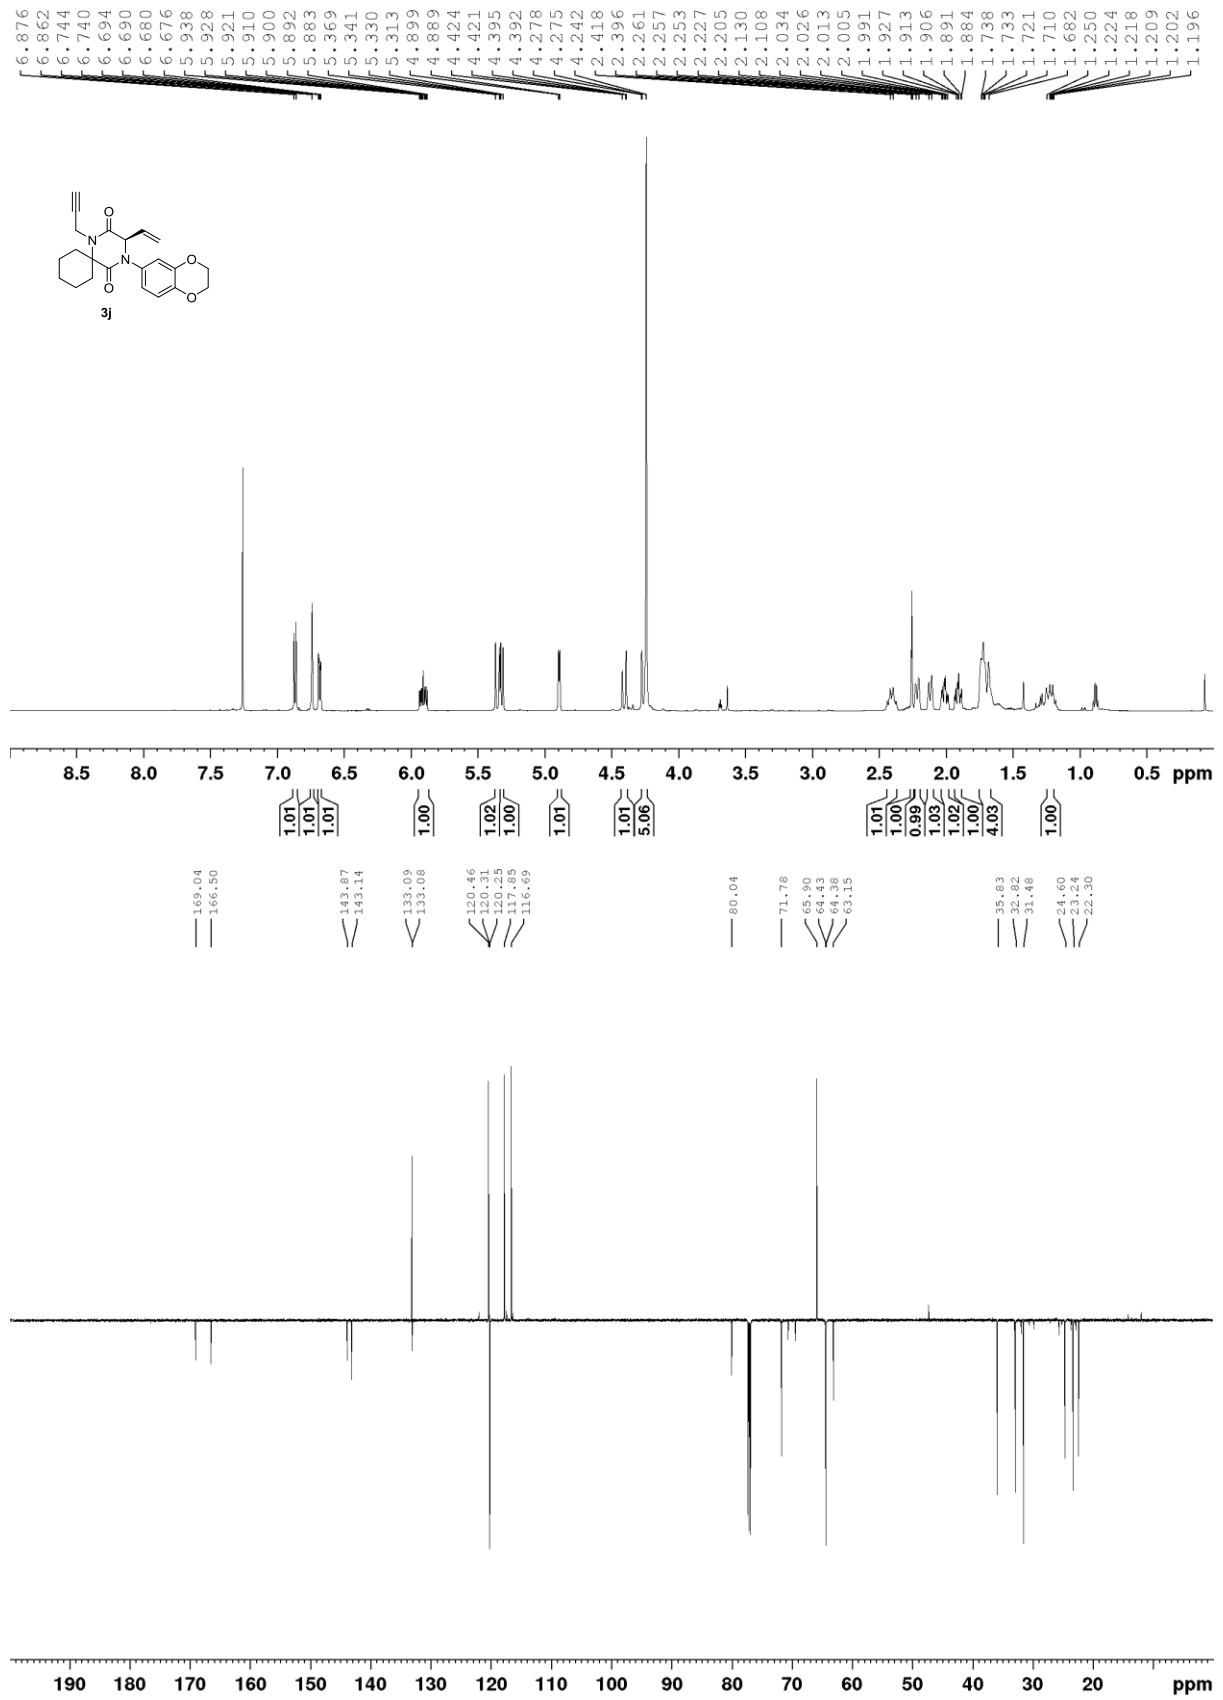

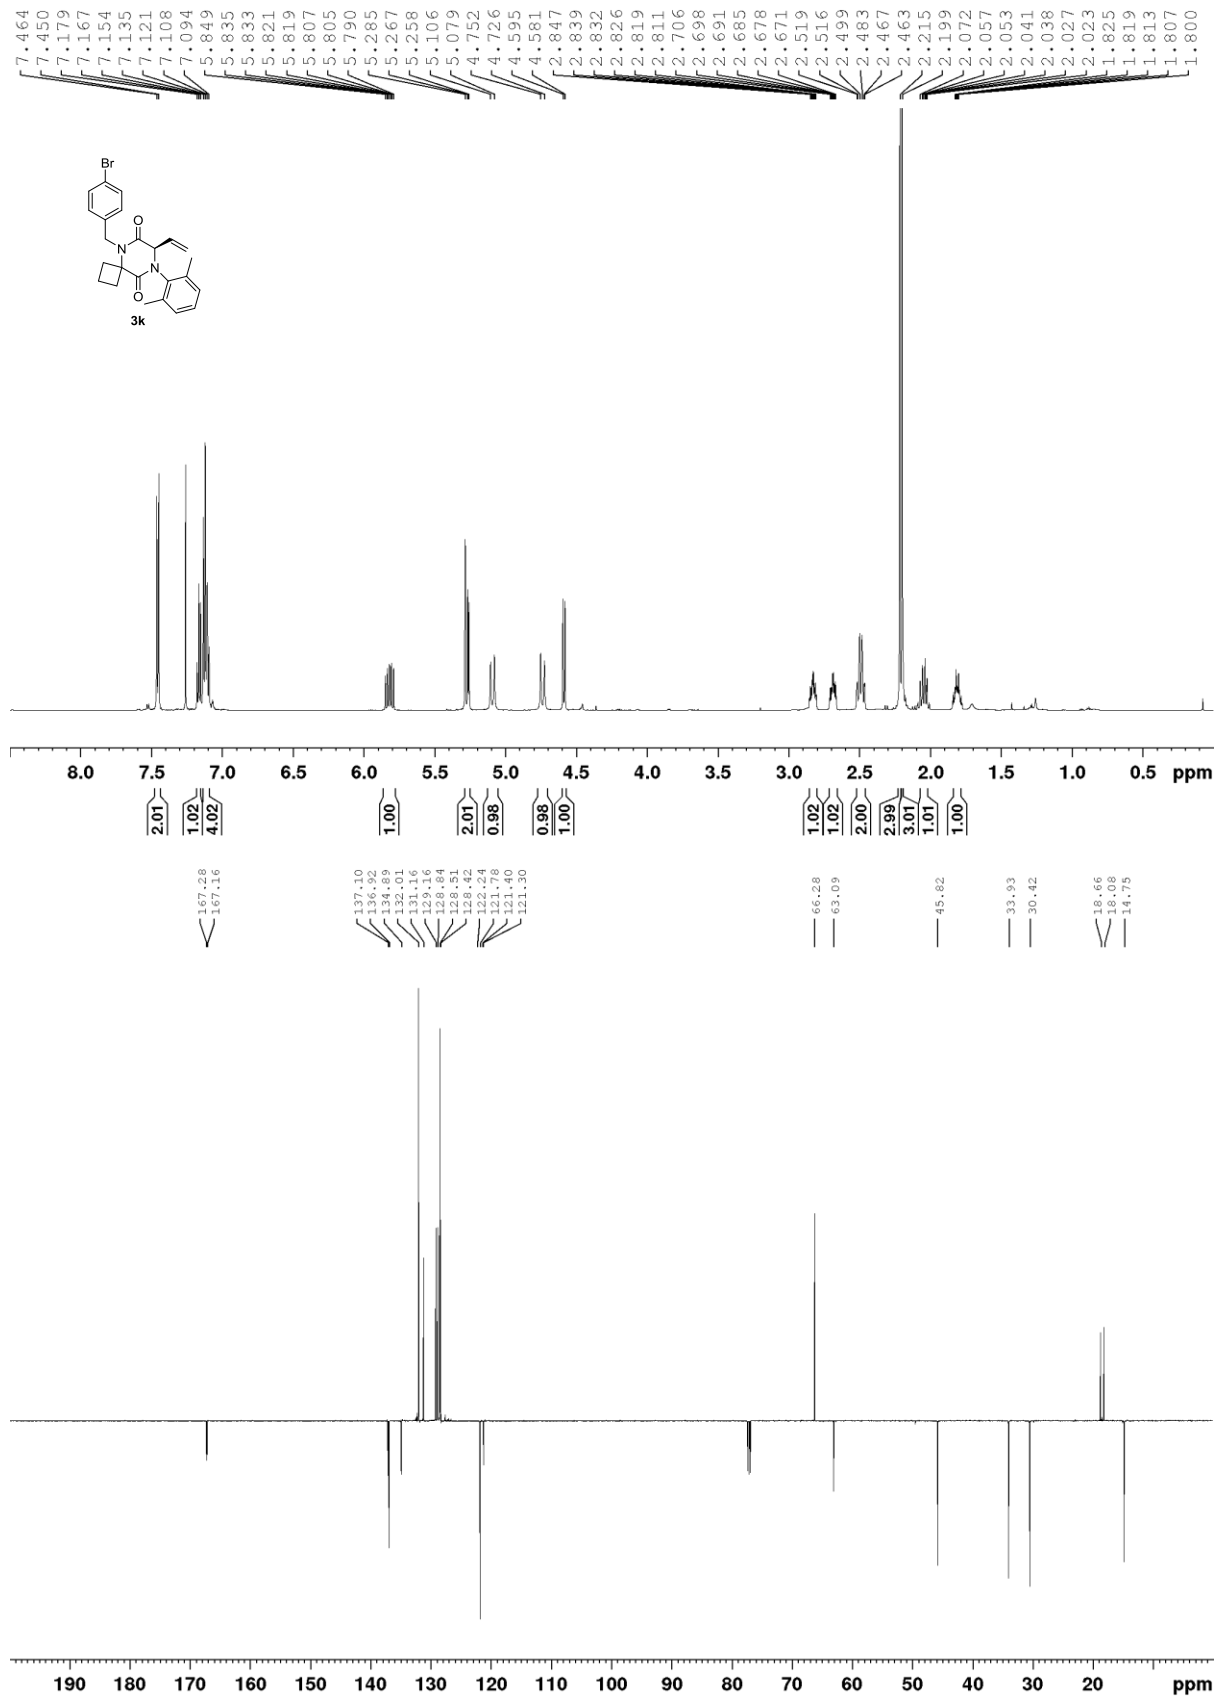

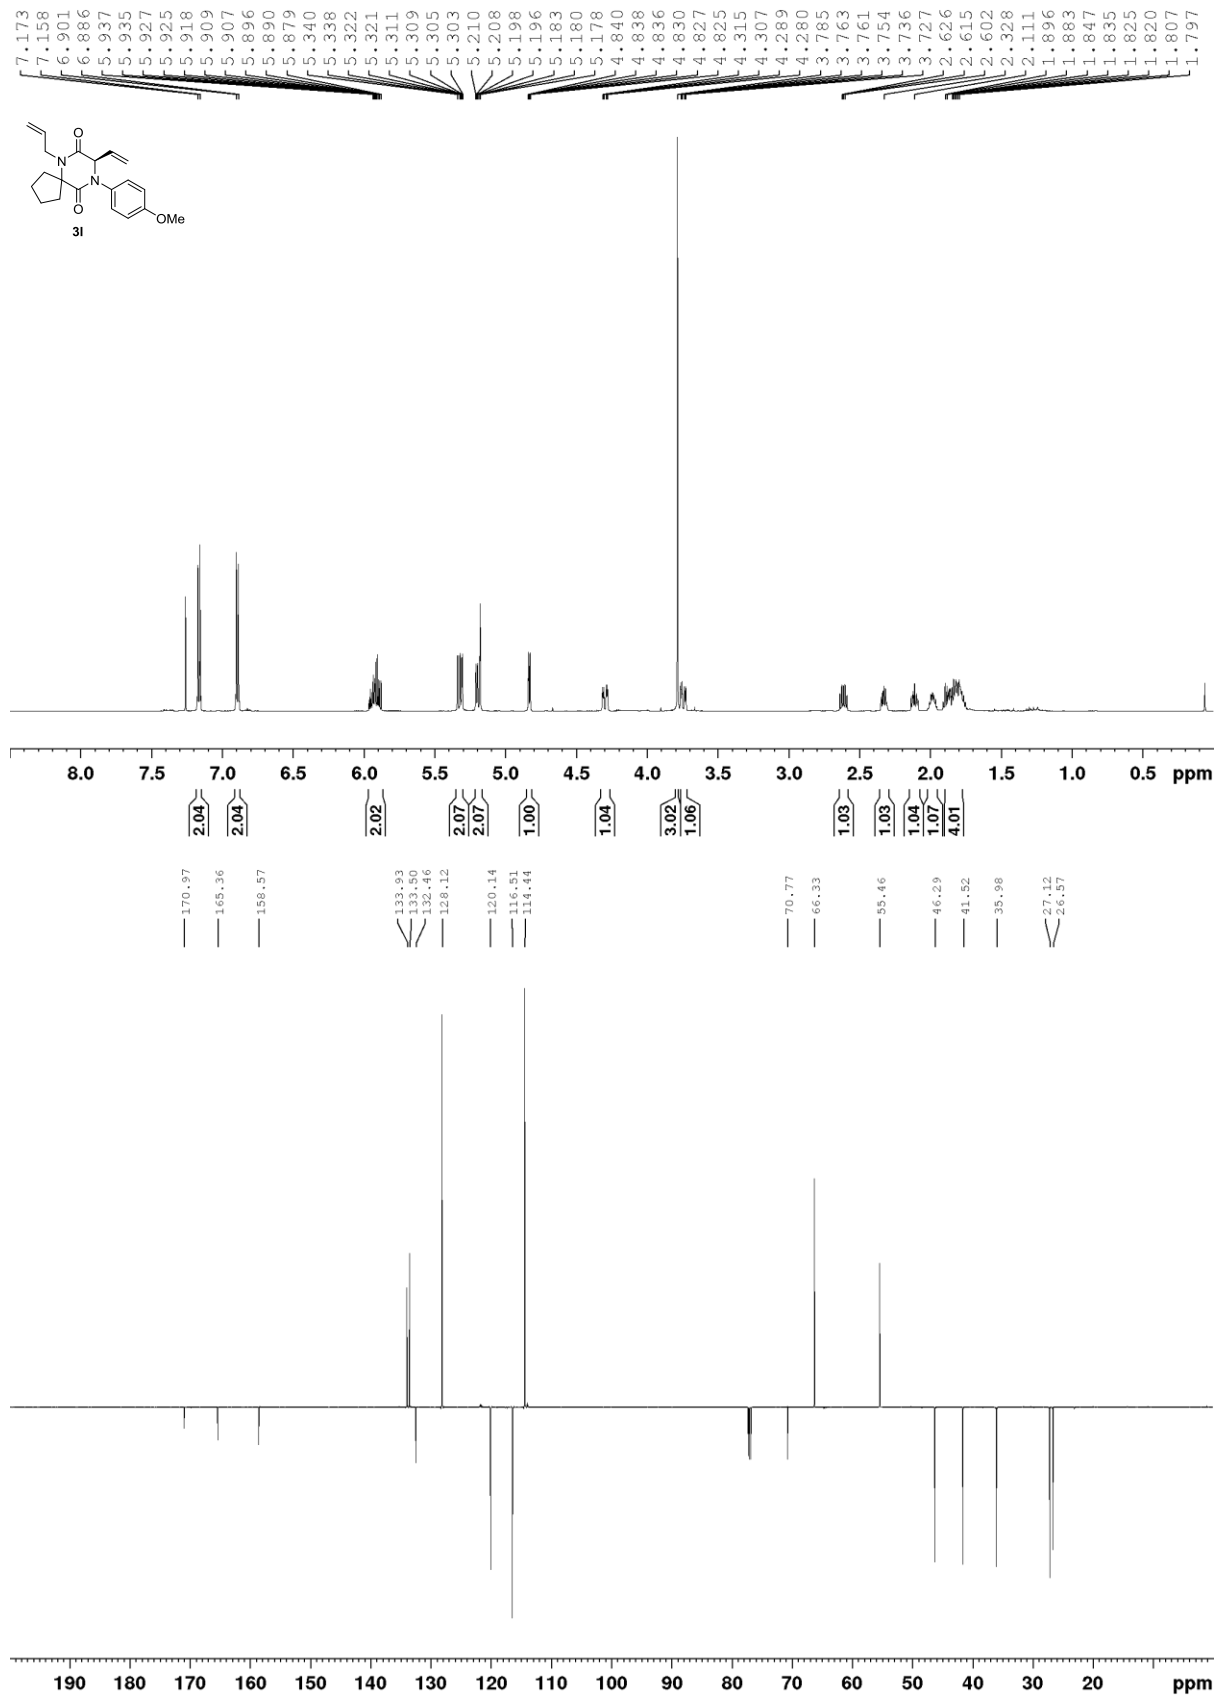

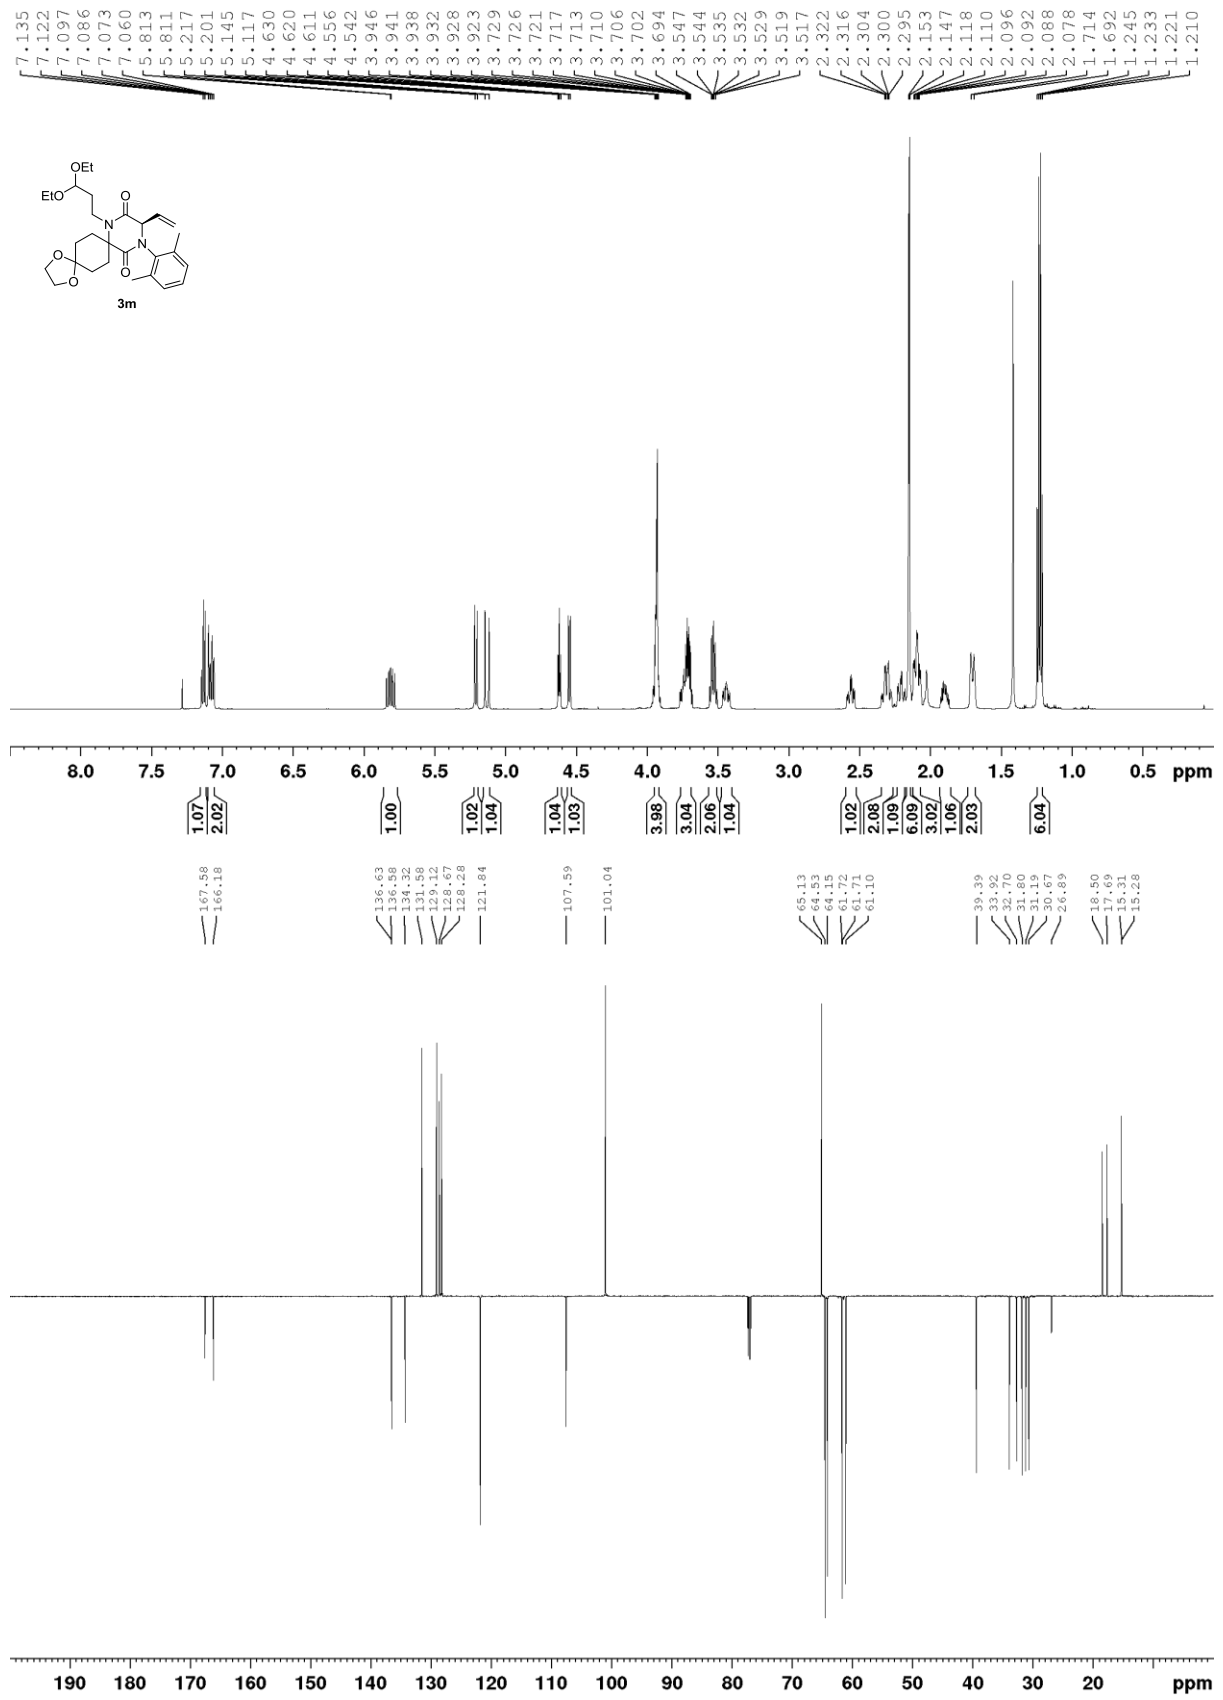

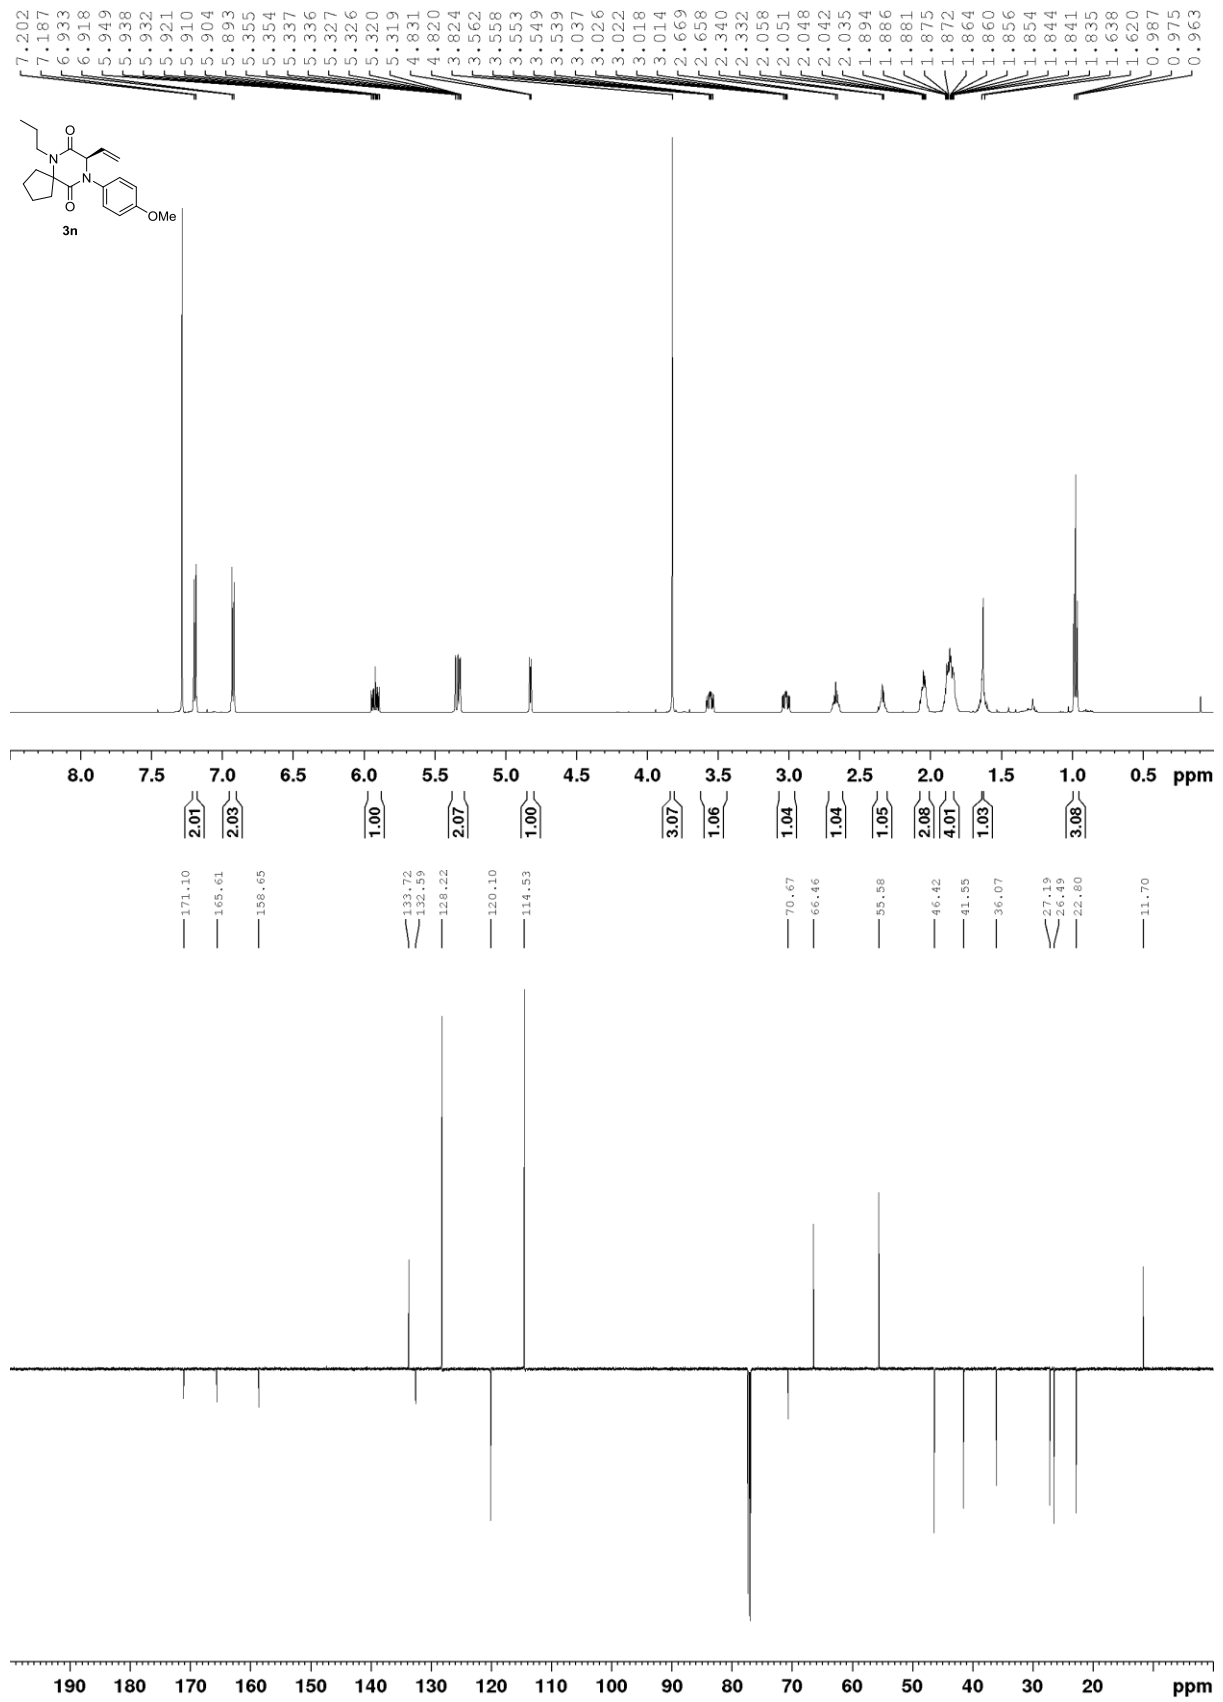

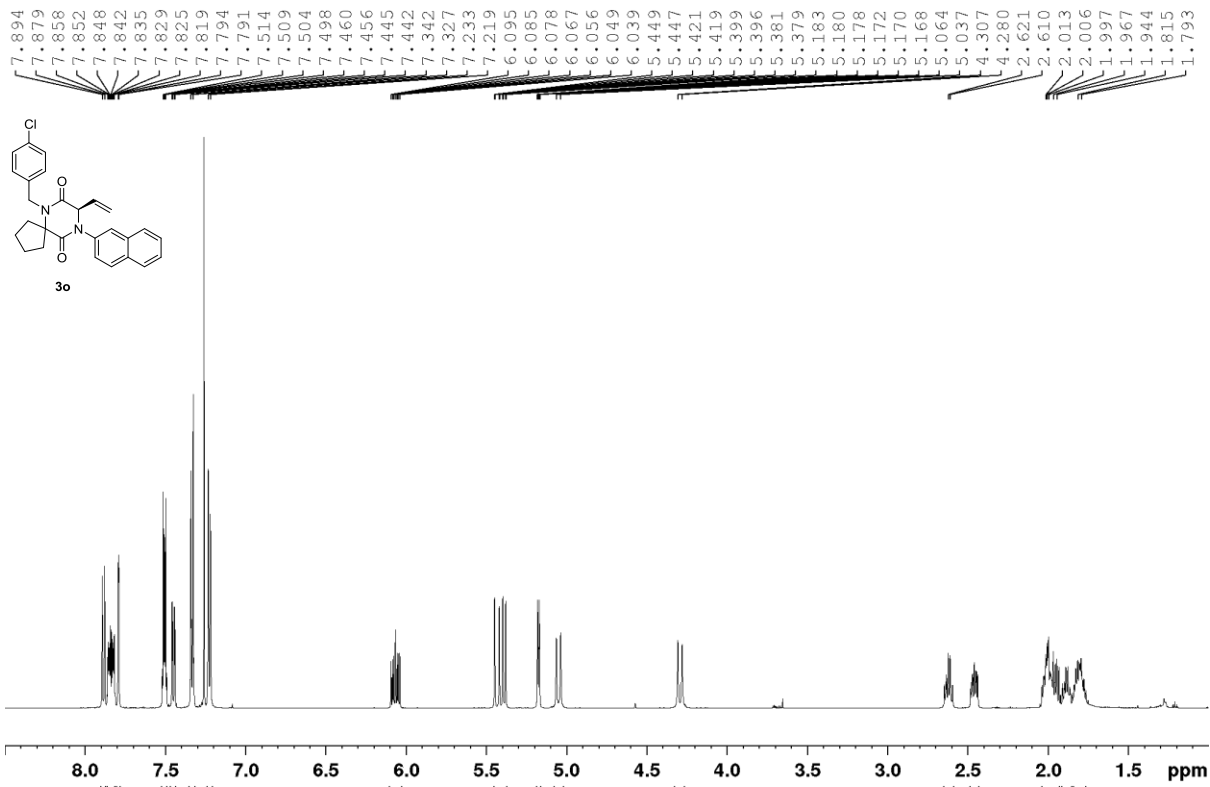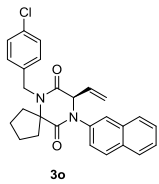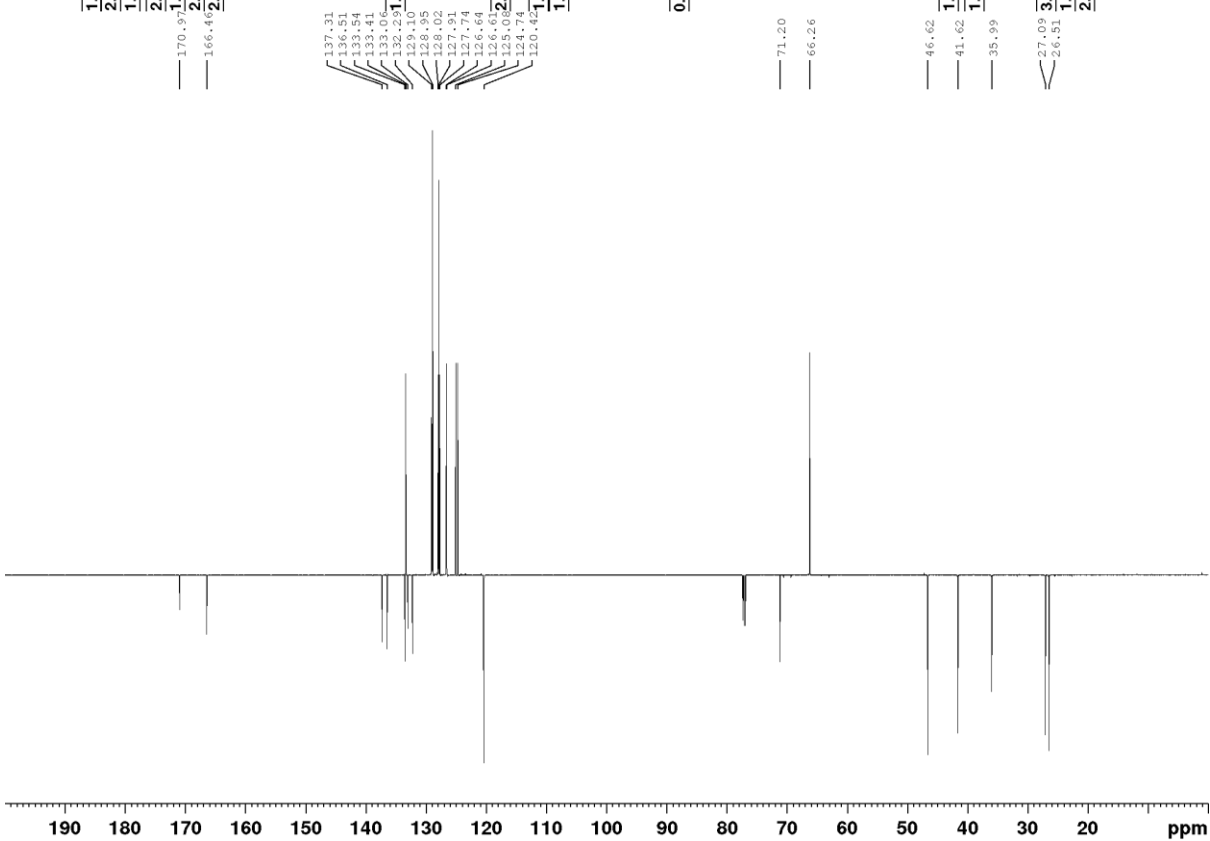

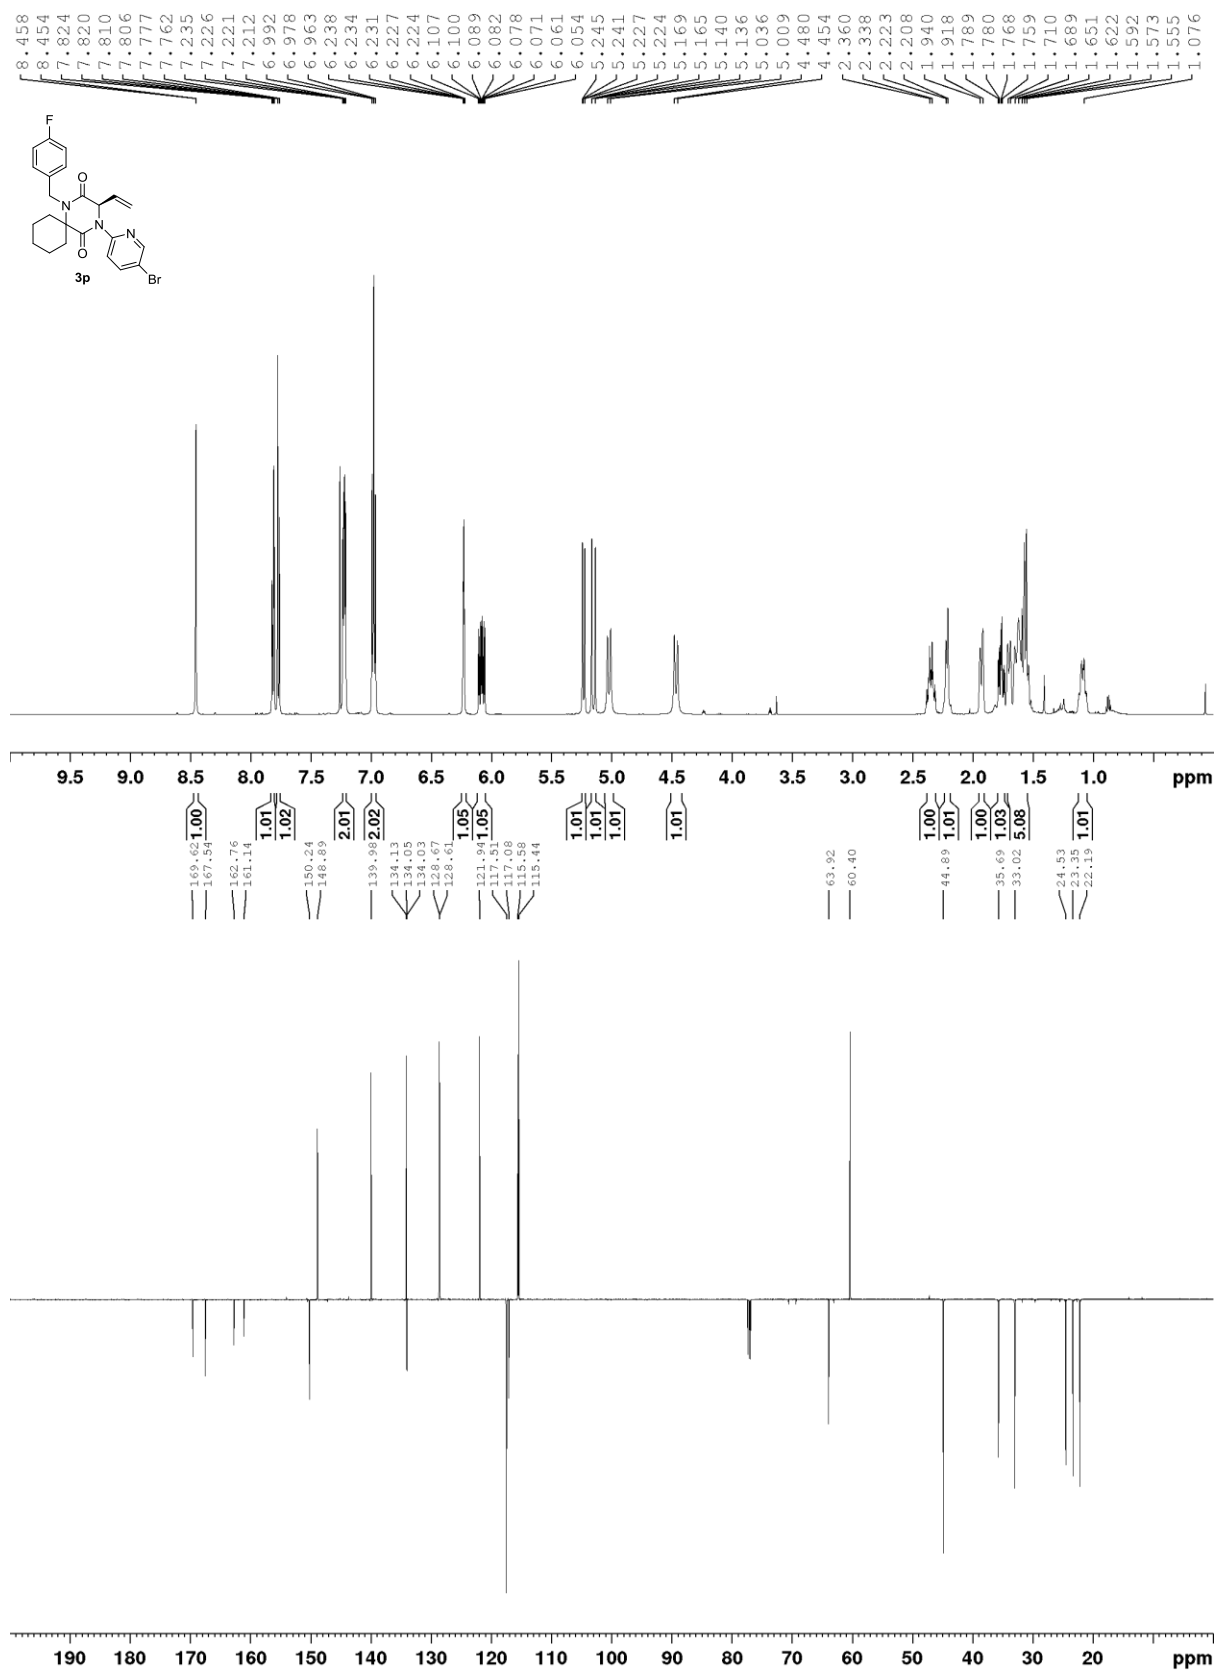

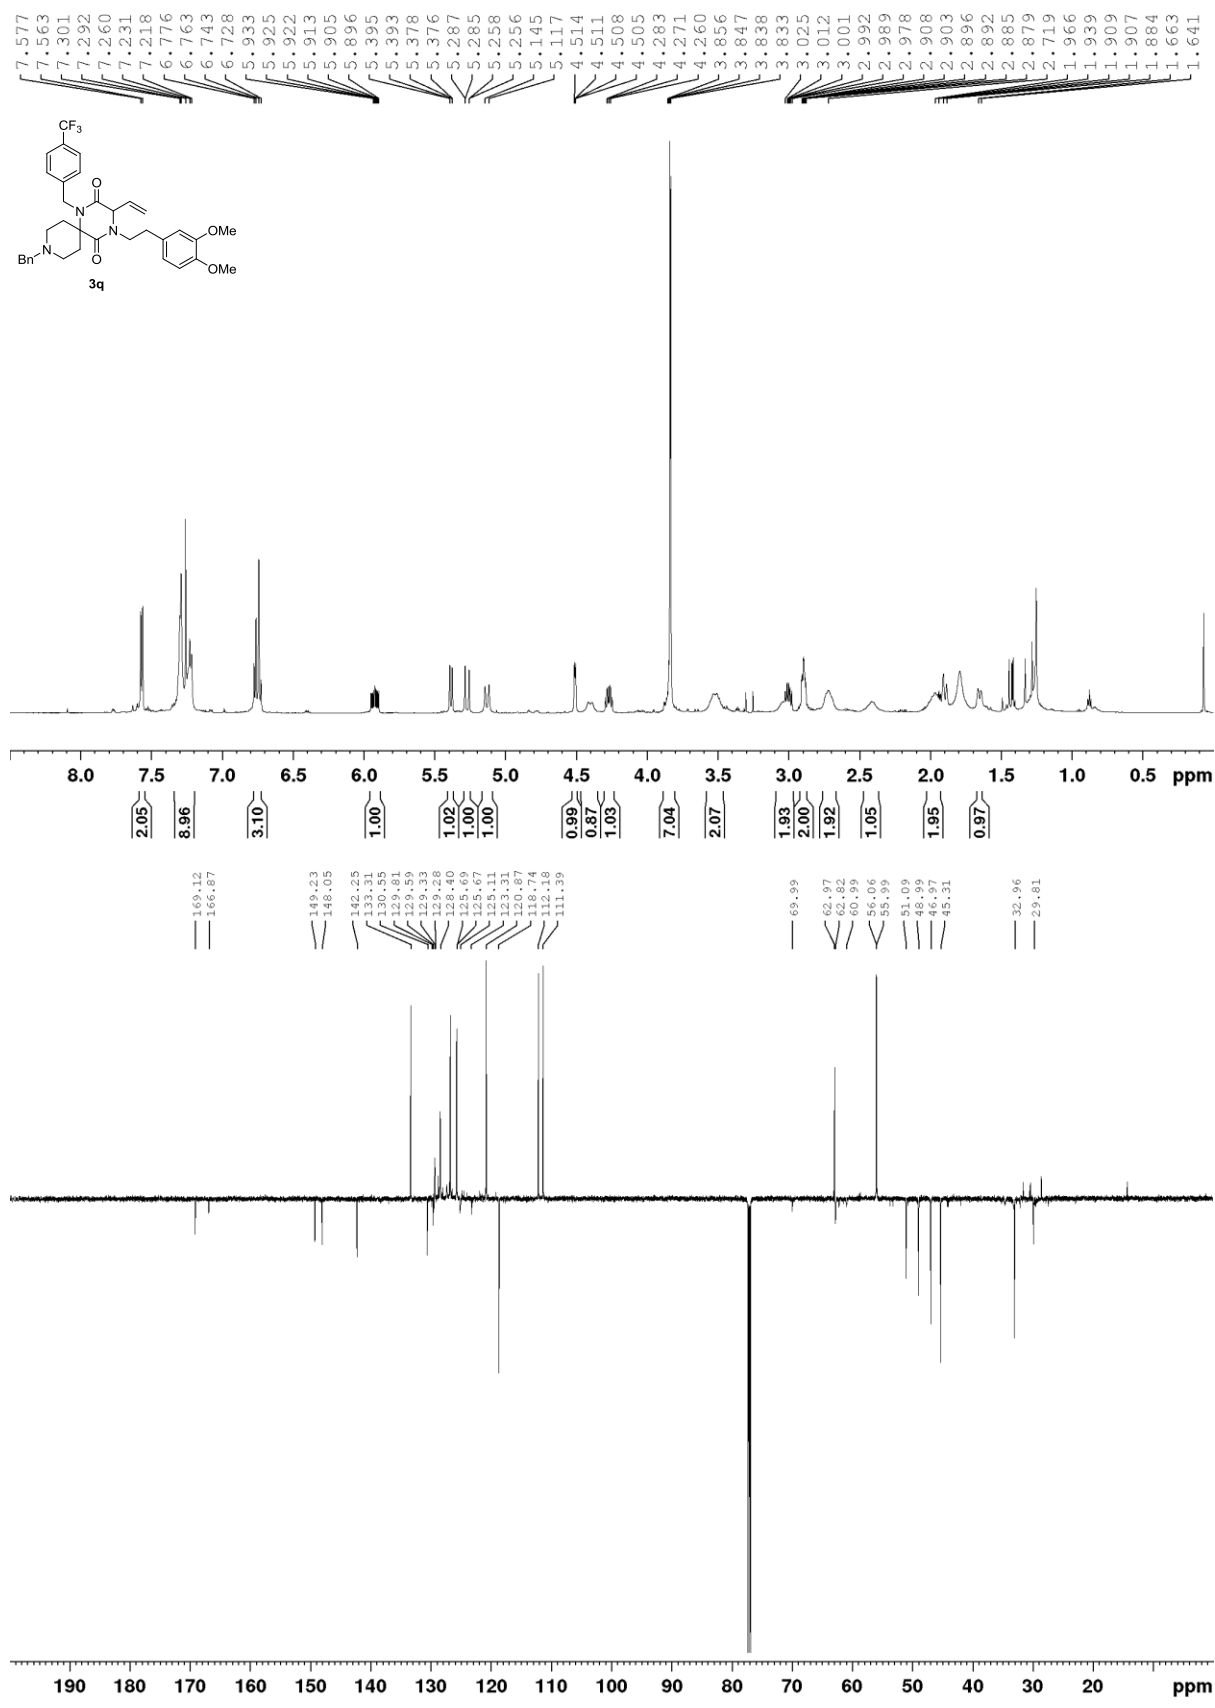



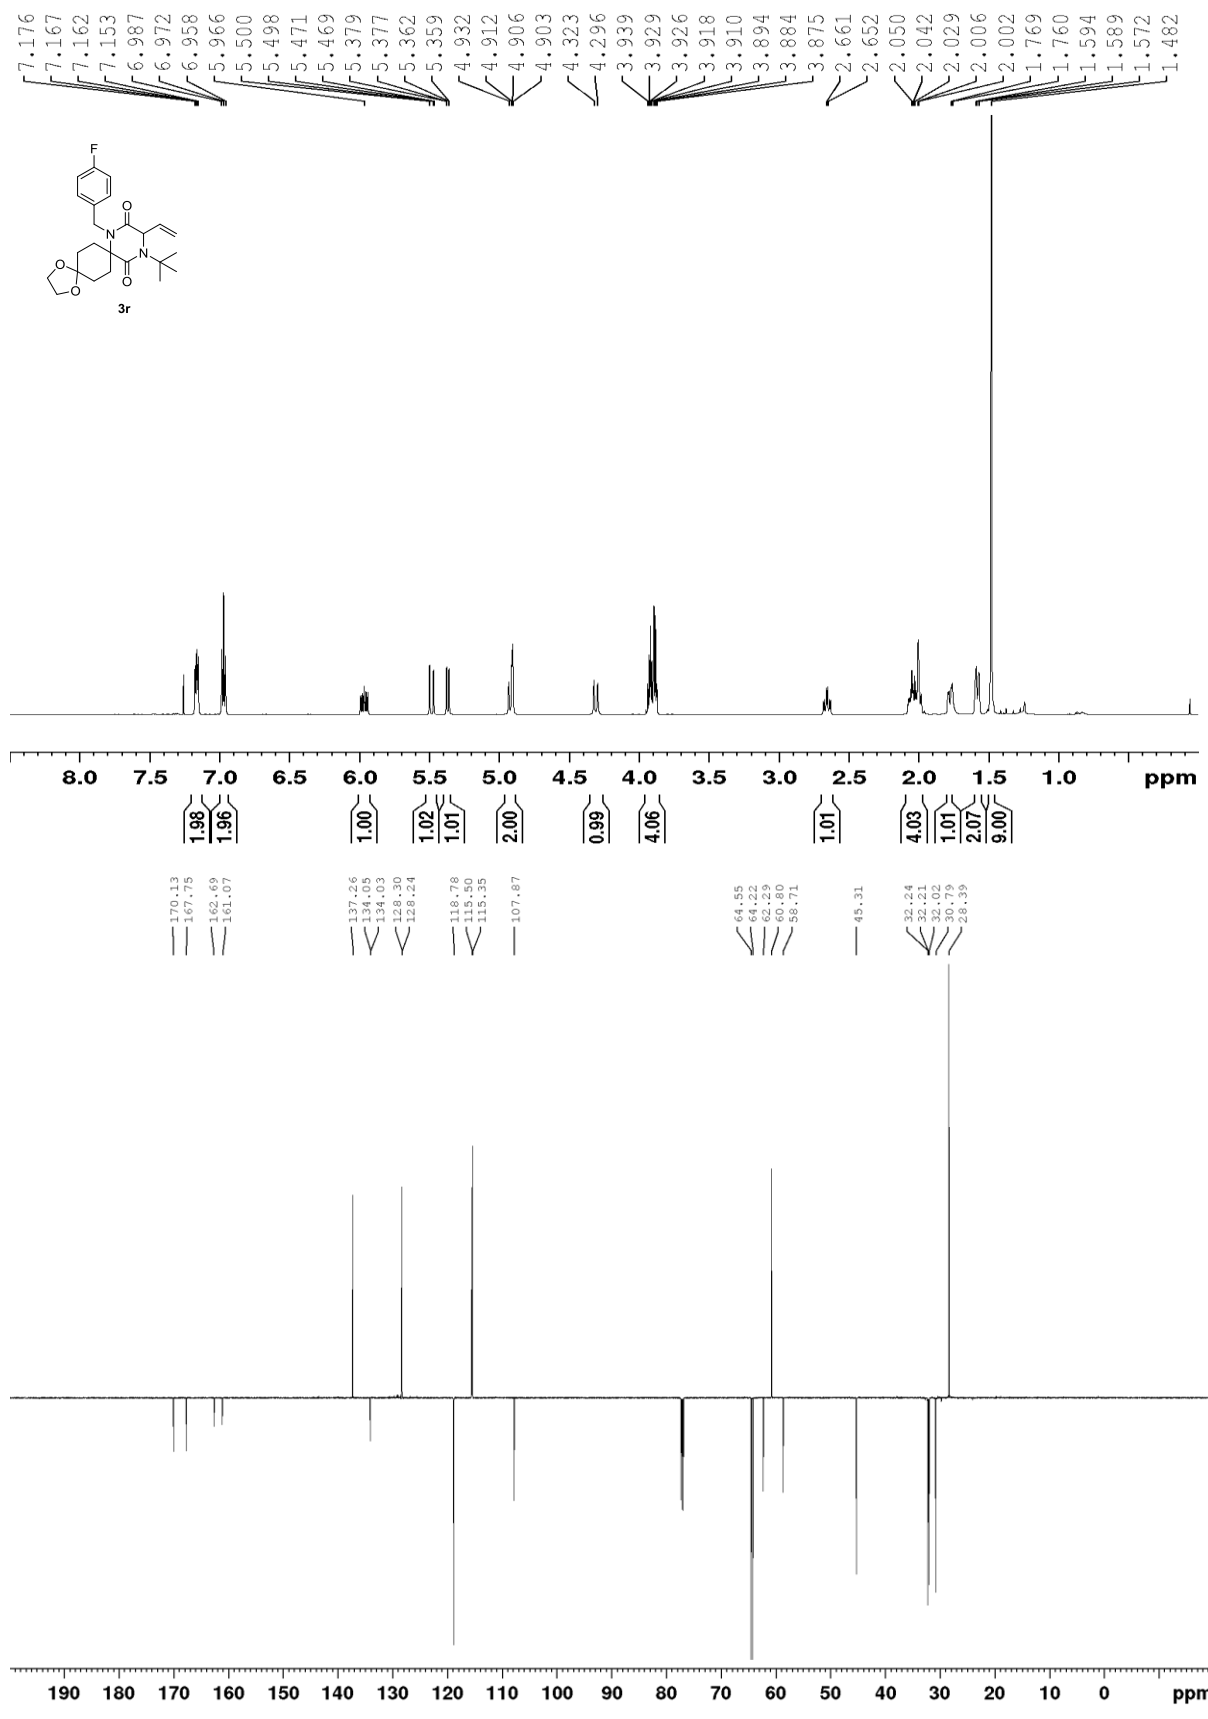

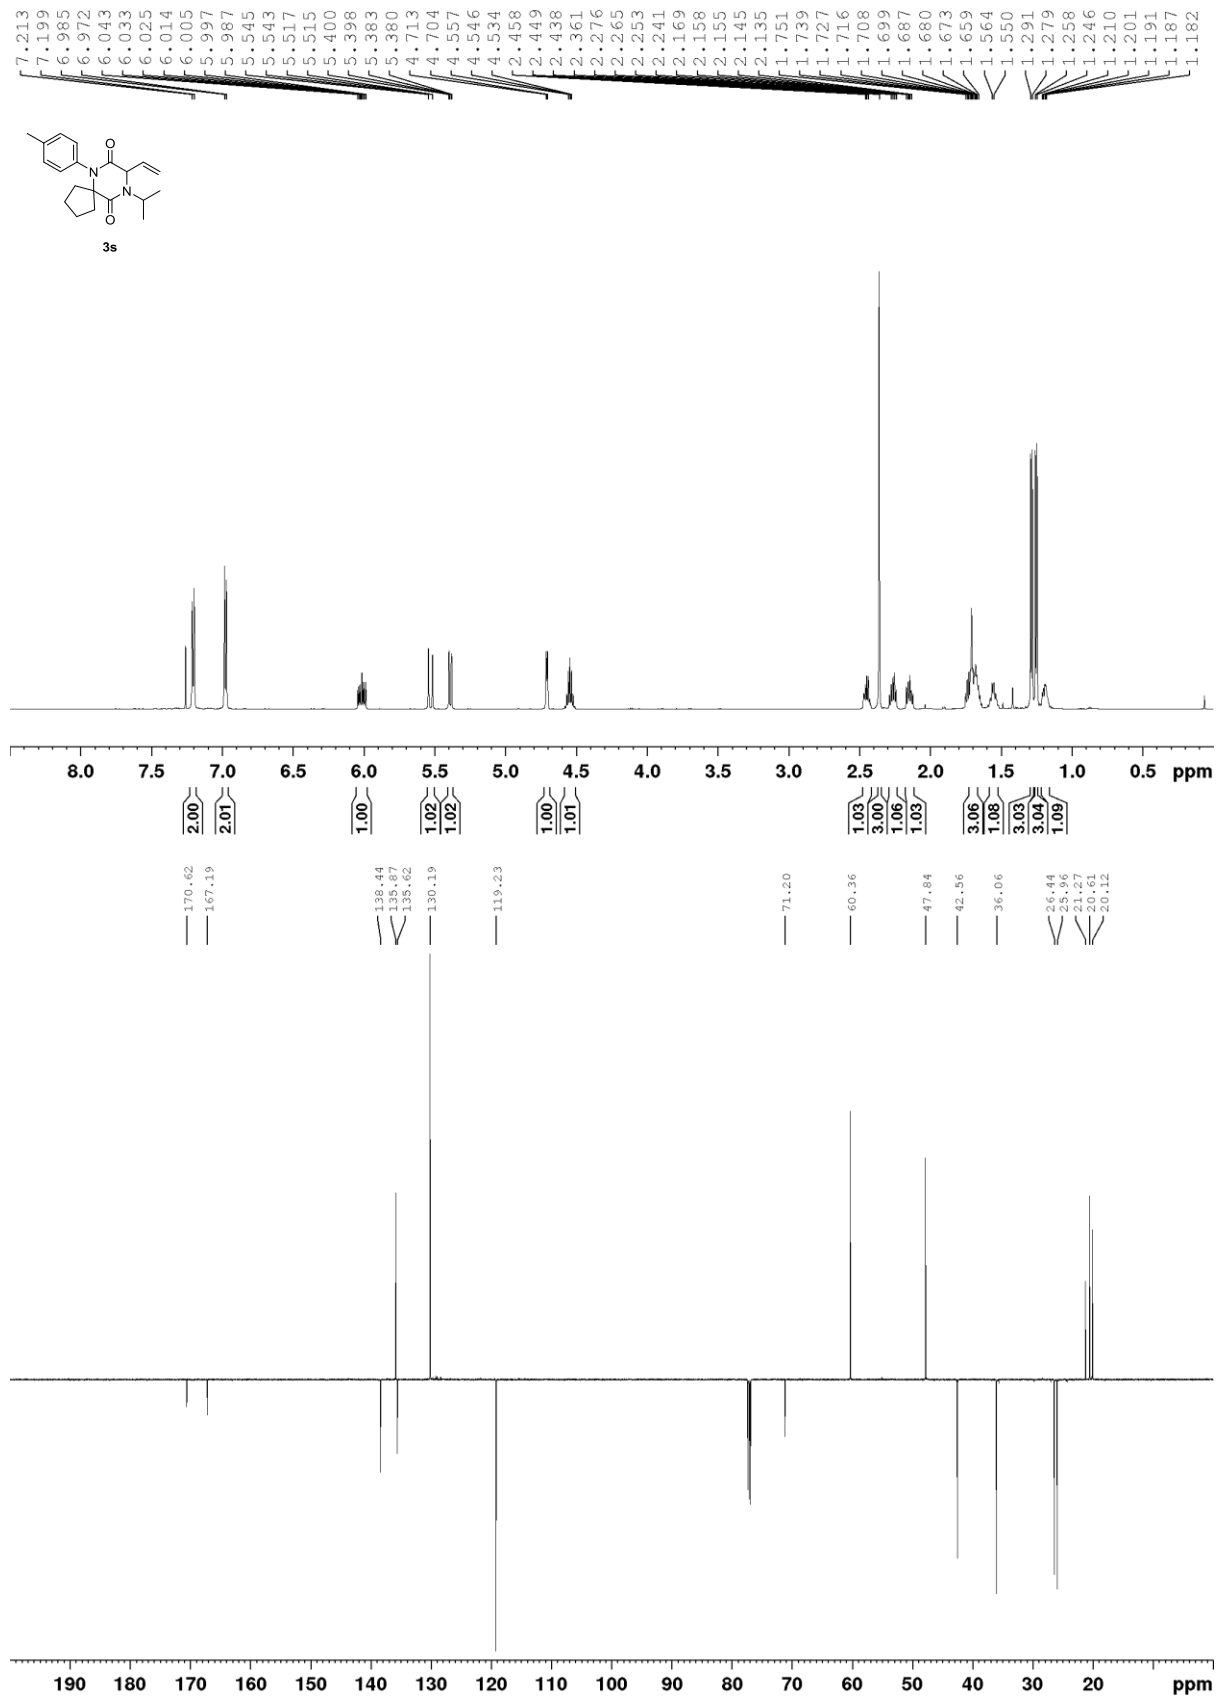

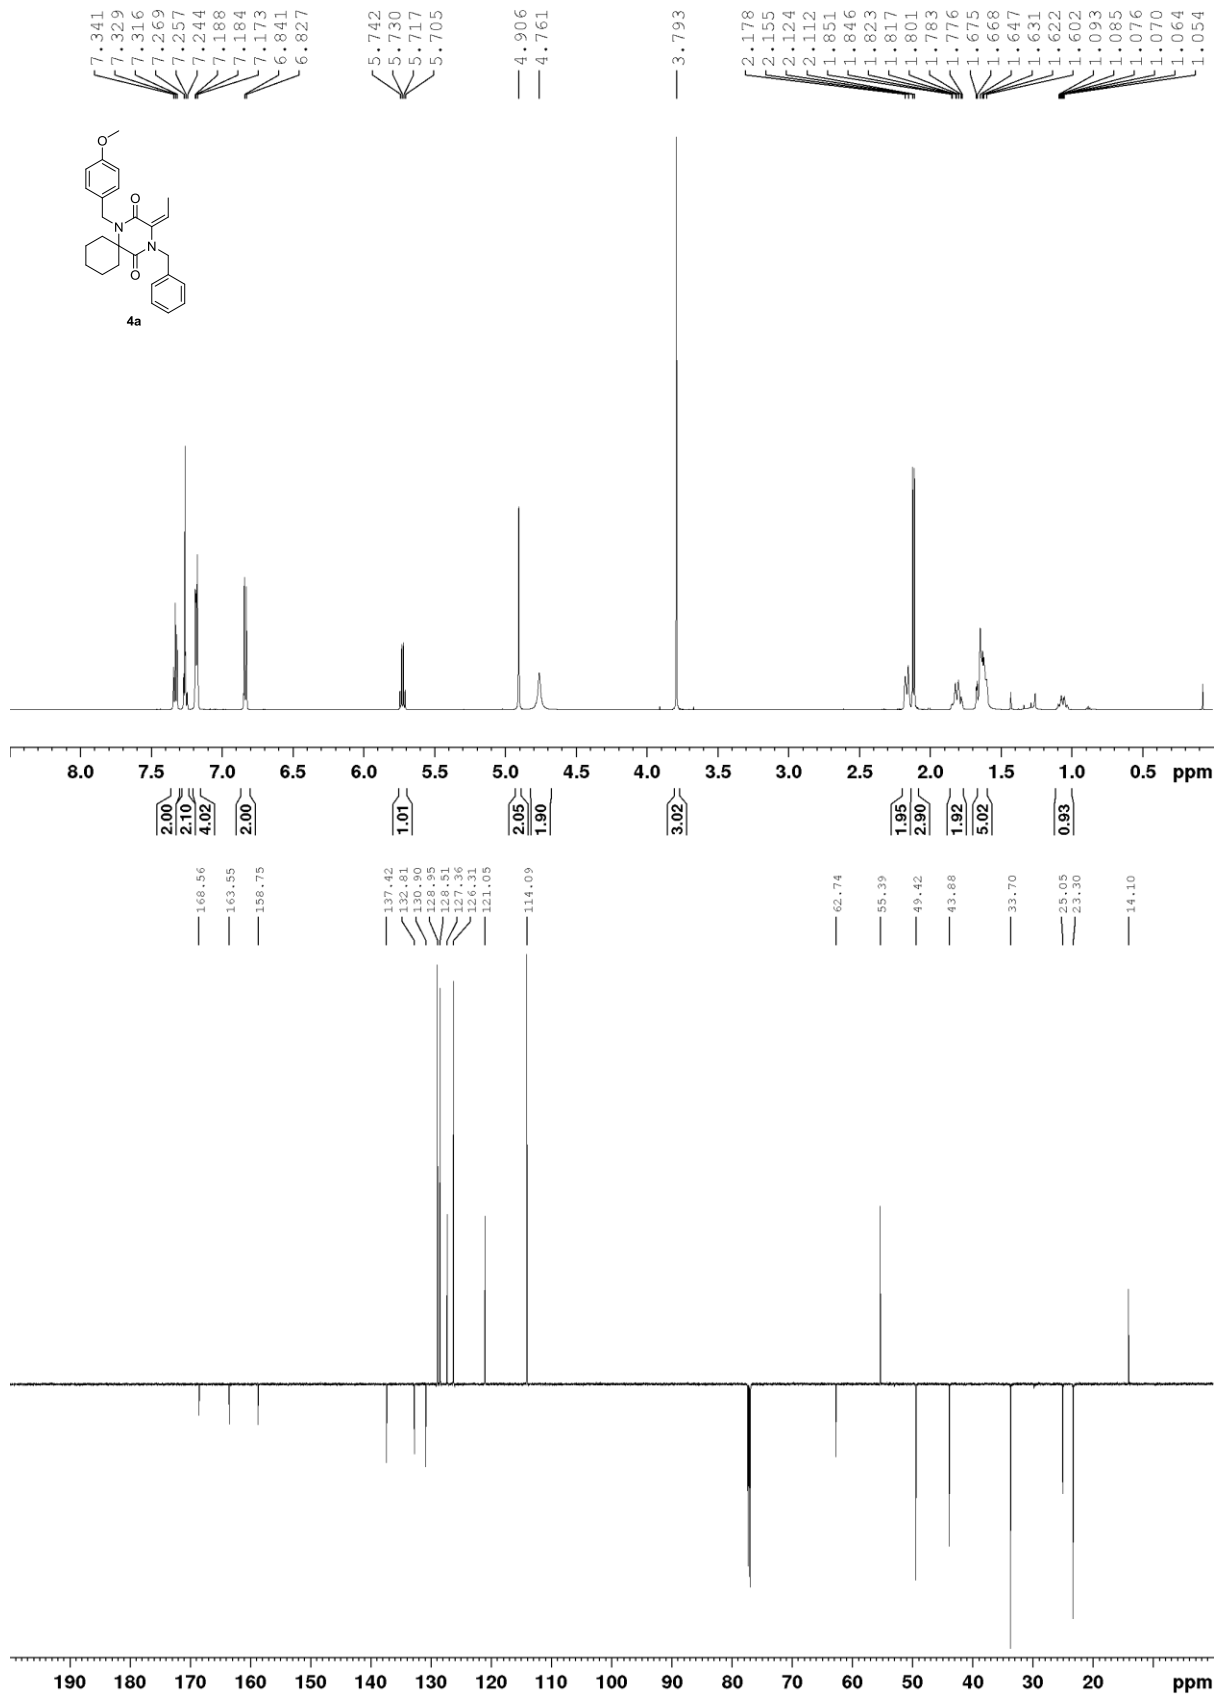

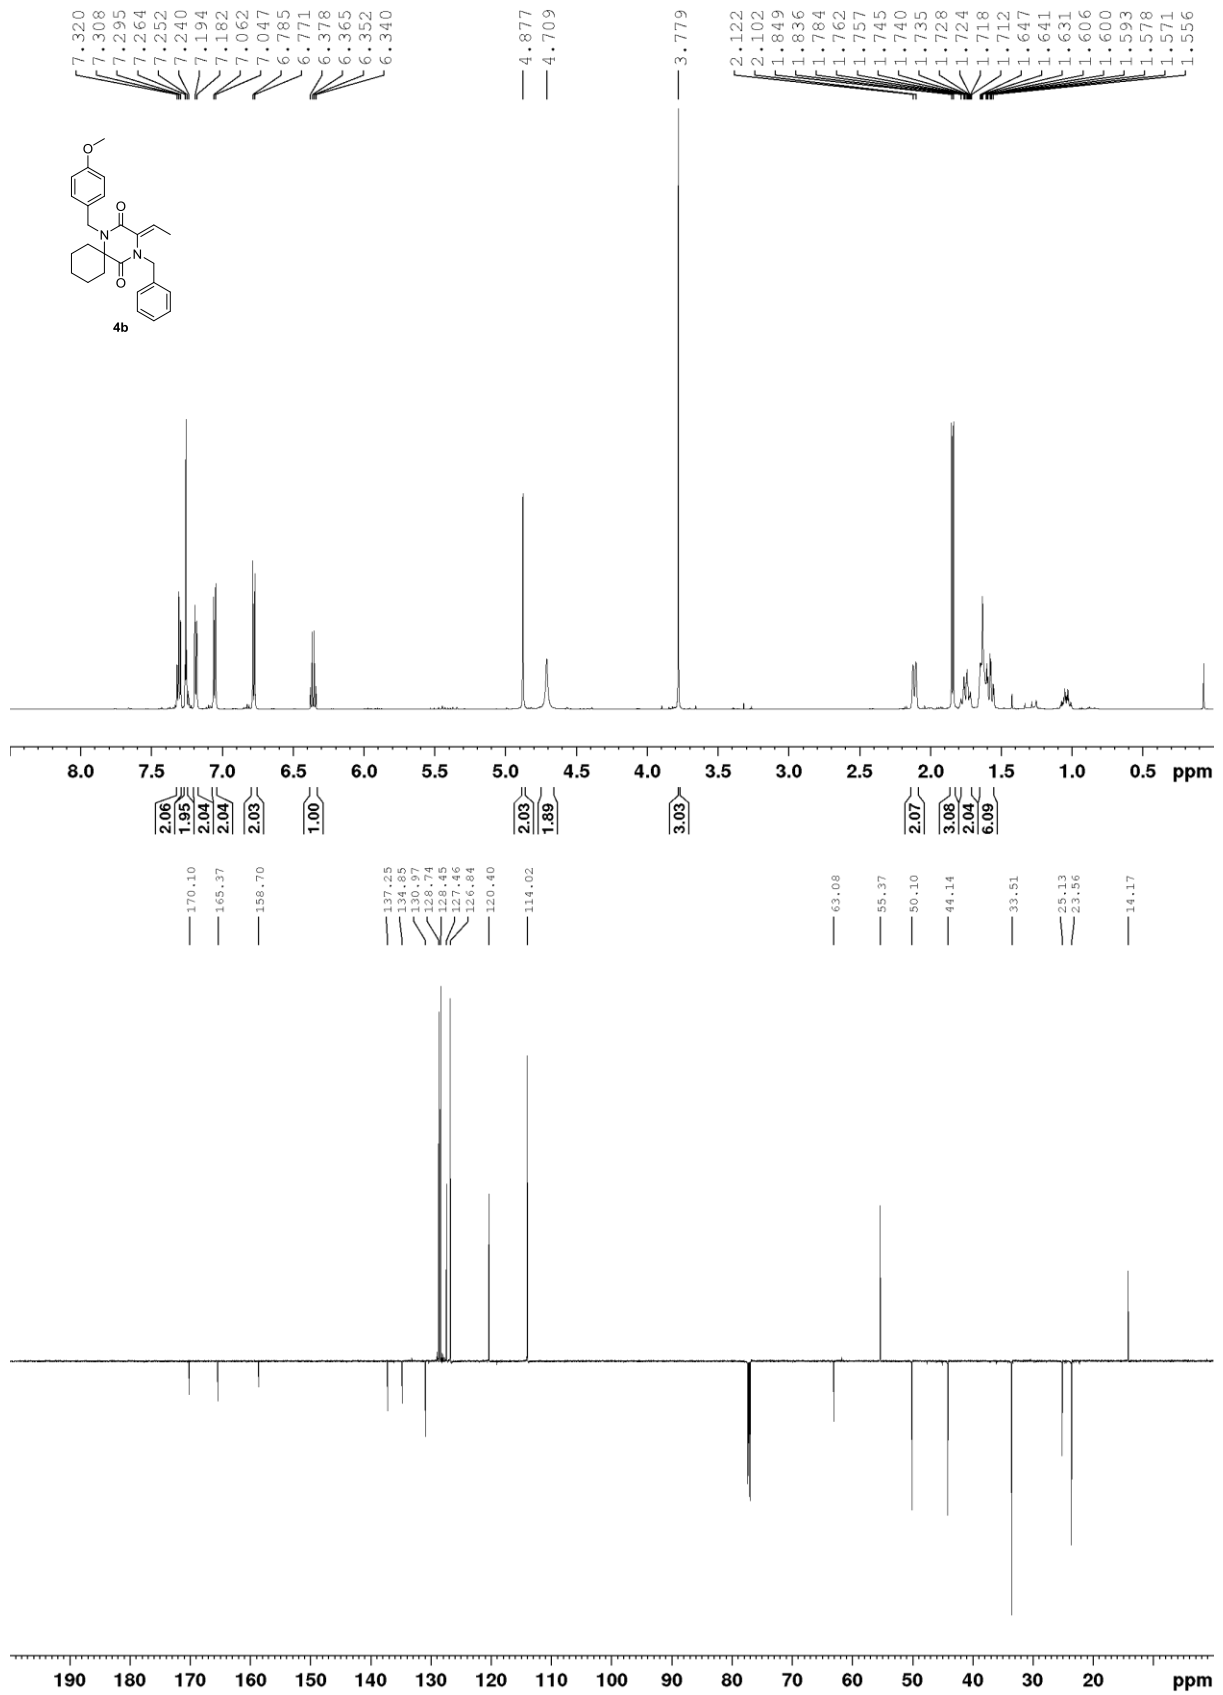

## NOESY analysis of 4a

All relevant correlations are indicated by a red outline.

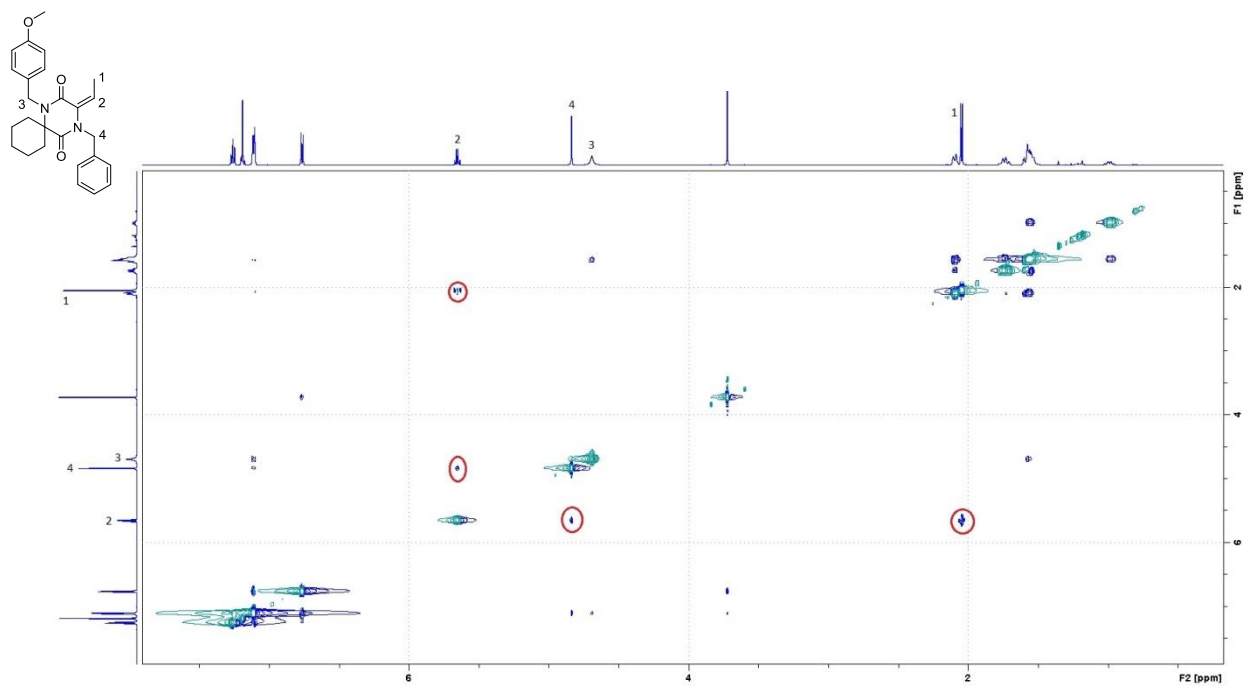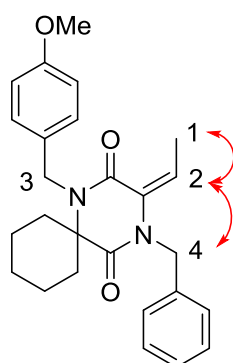

## NOESY analysis of 4b

All relevant correlations are indicated by a red outline.

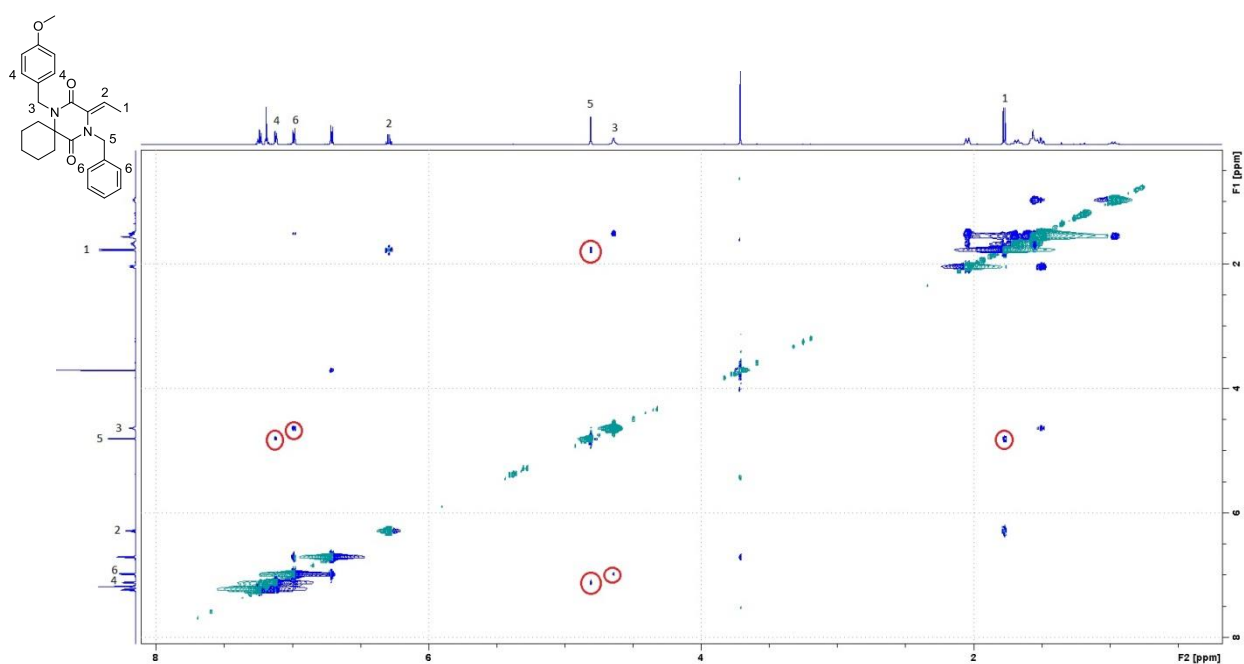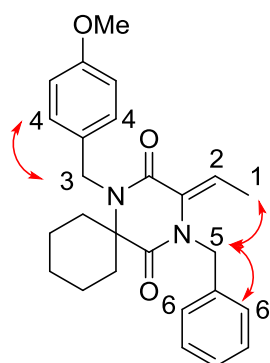

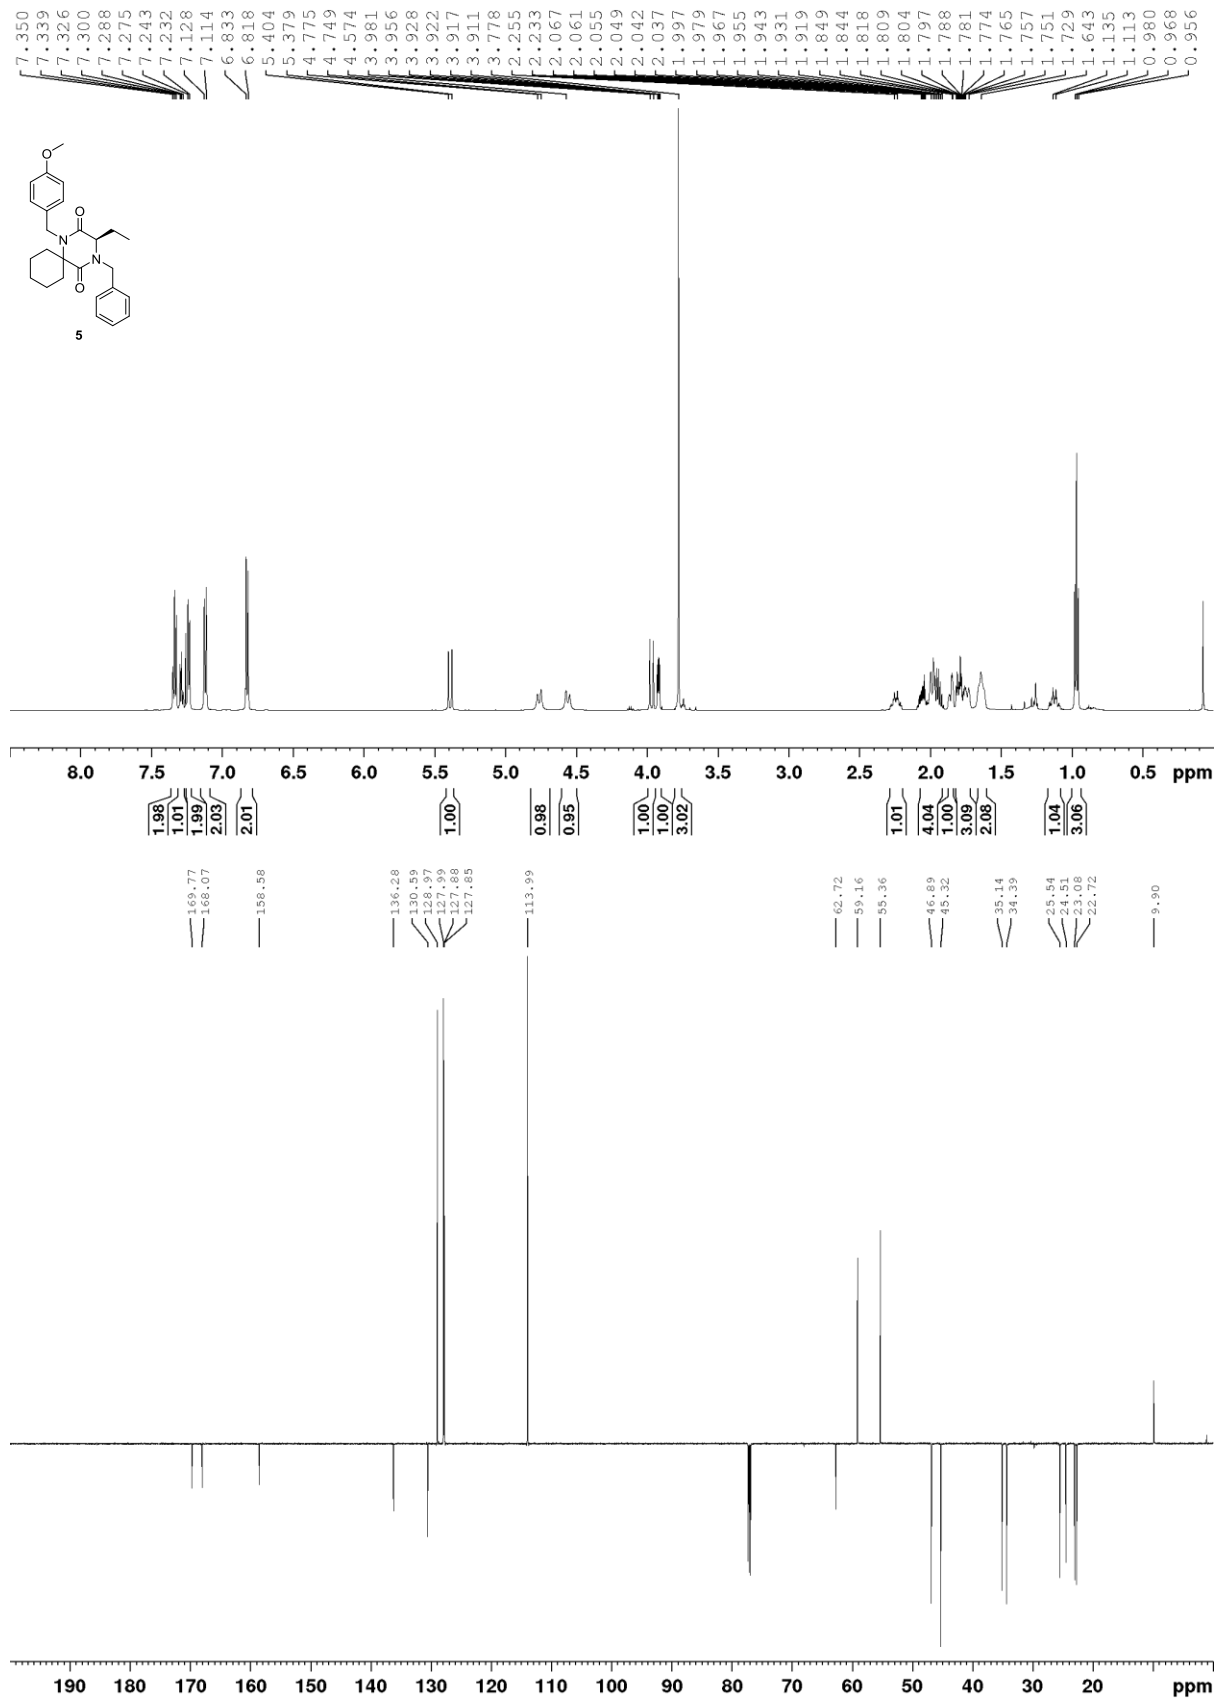

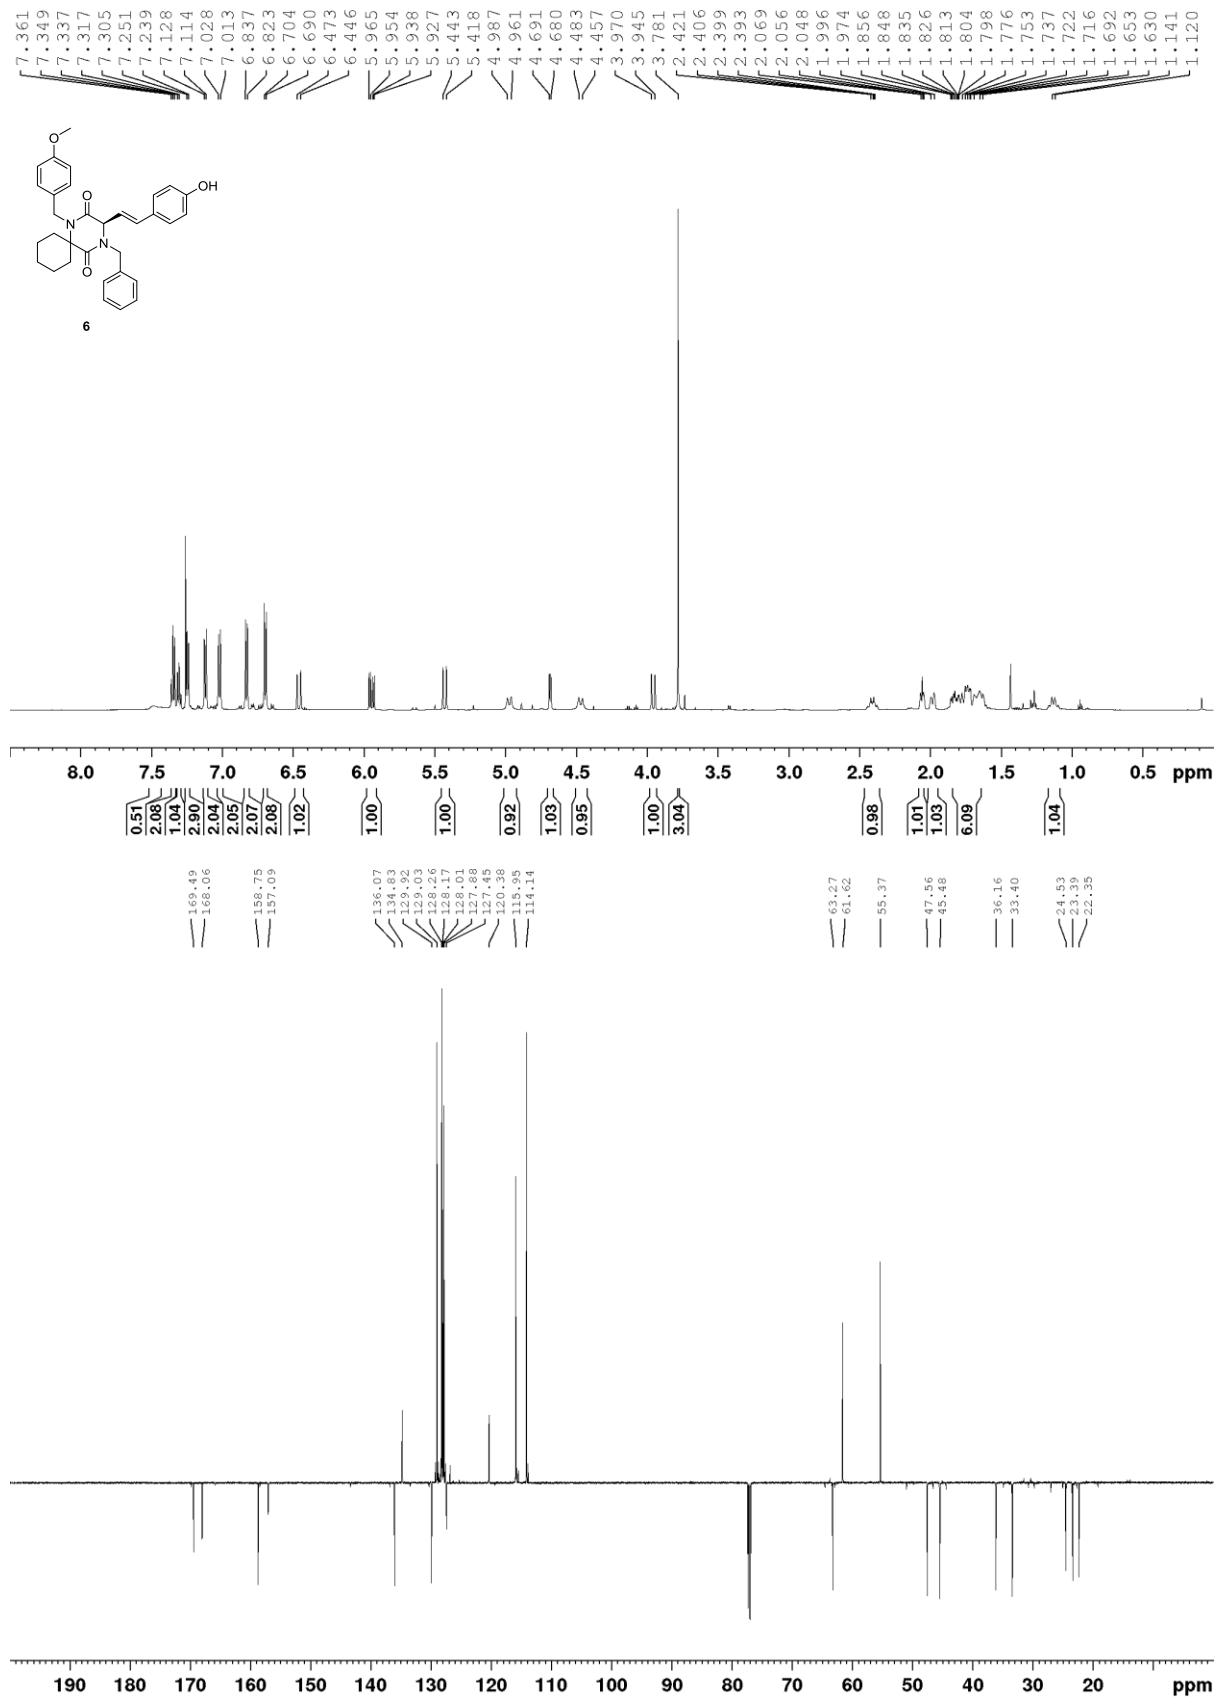



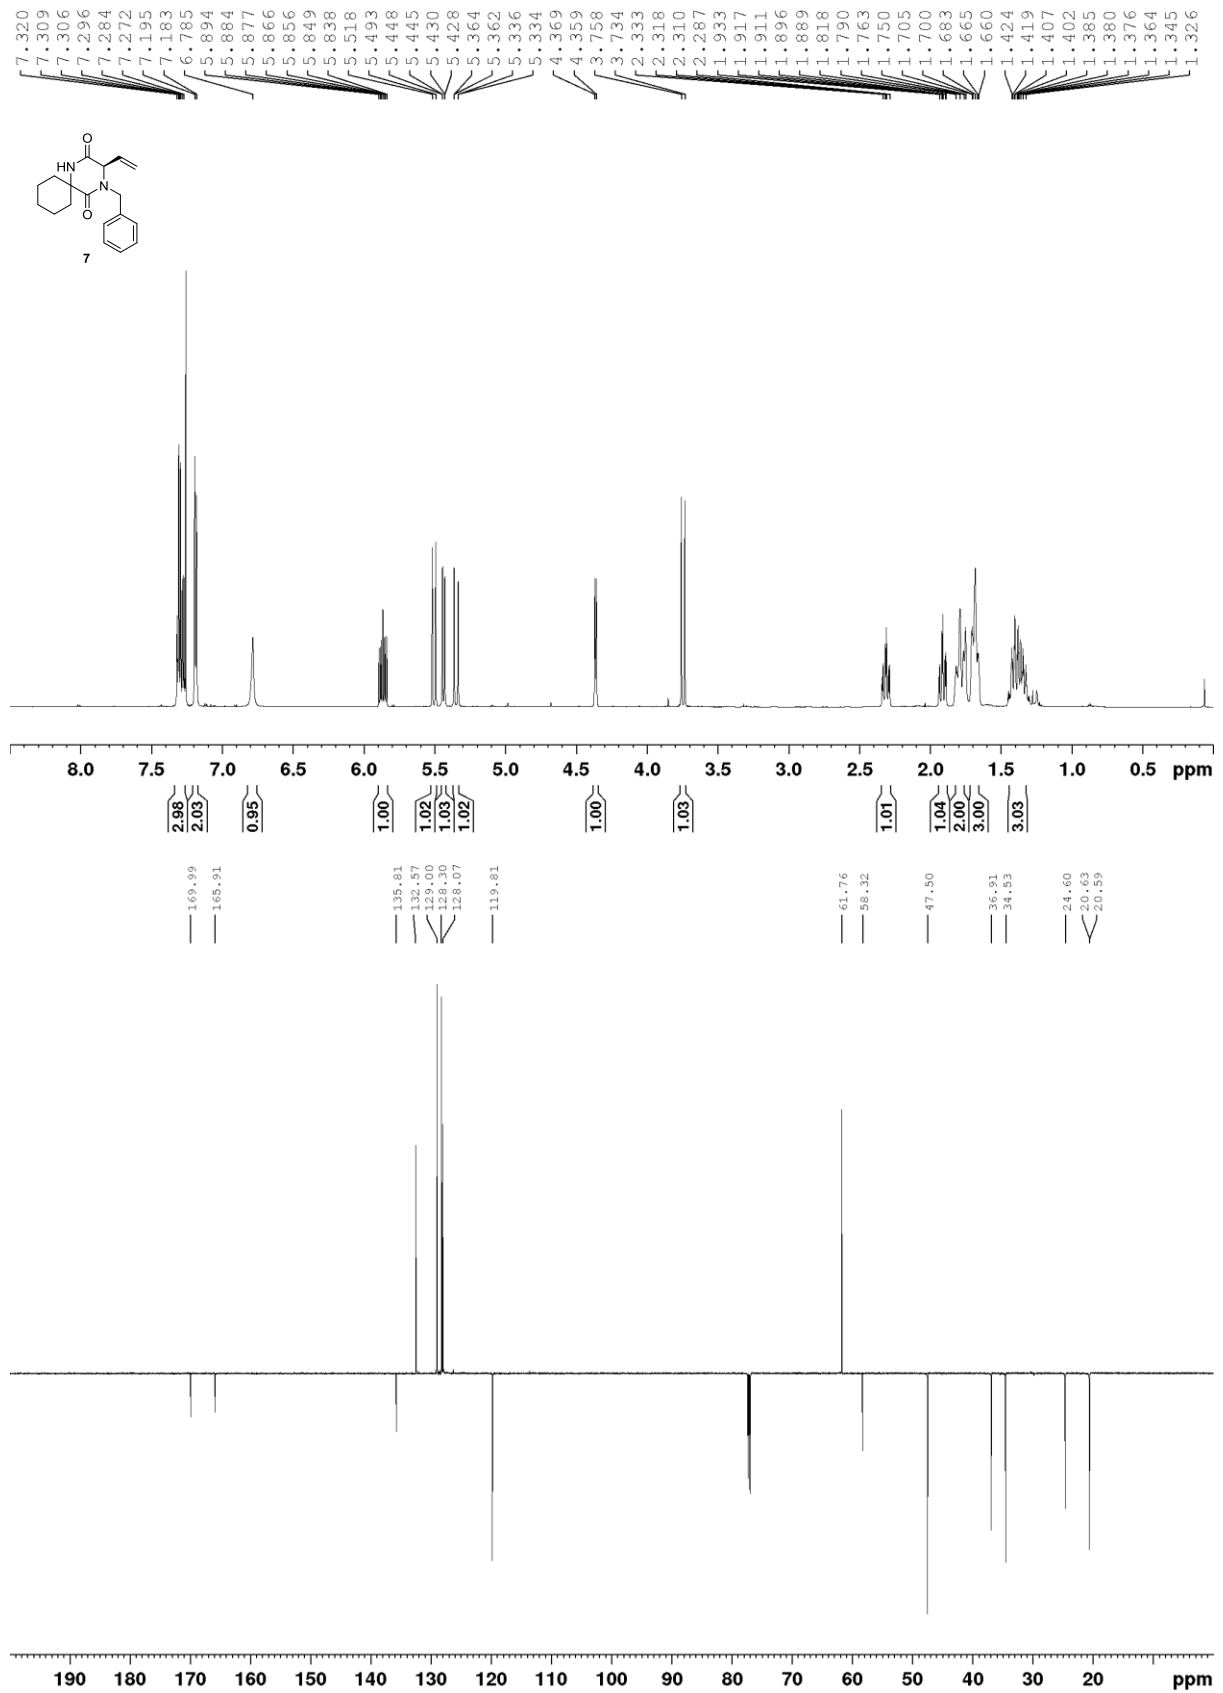

Supplement: jo9b01994_si_001.pdf [file jo9b01994_si_001.pdf]
